# Supplementary material for: Reprogramming of bone marrow myeloid progenitor cells in patients with severe coronary artery disease
Source: eLife journal article supplement (doi:10.7554/elife.60939), 2020-11-09
Supplement: figures [file elife-60939-figures-v2.pdf]

---

## Figures and figure supplements

Reprogramming of bone marrow myeloid progenitor cells in patients with severe coronary artery disease

**Marlies P Noz *et al***

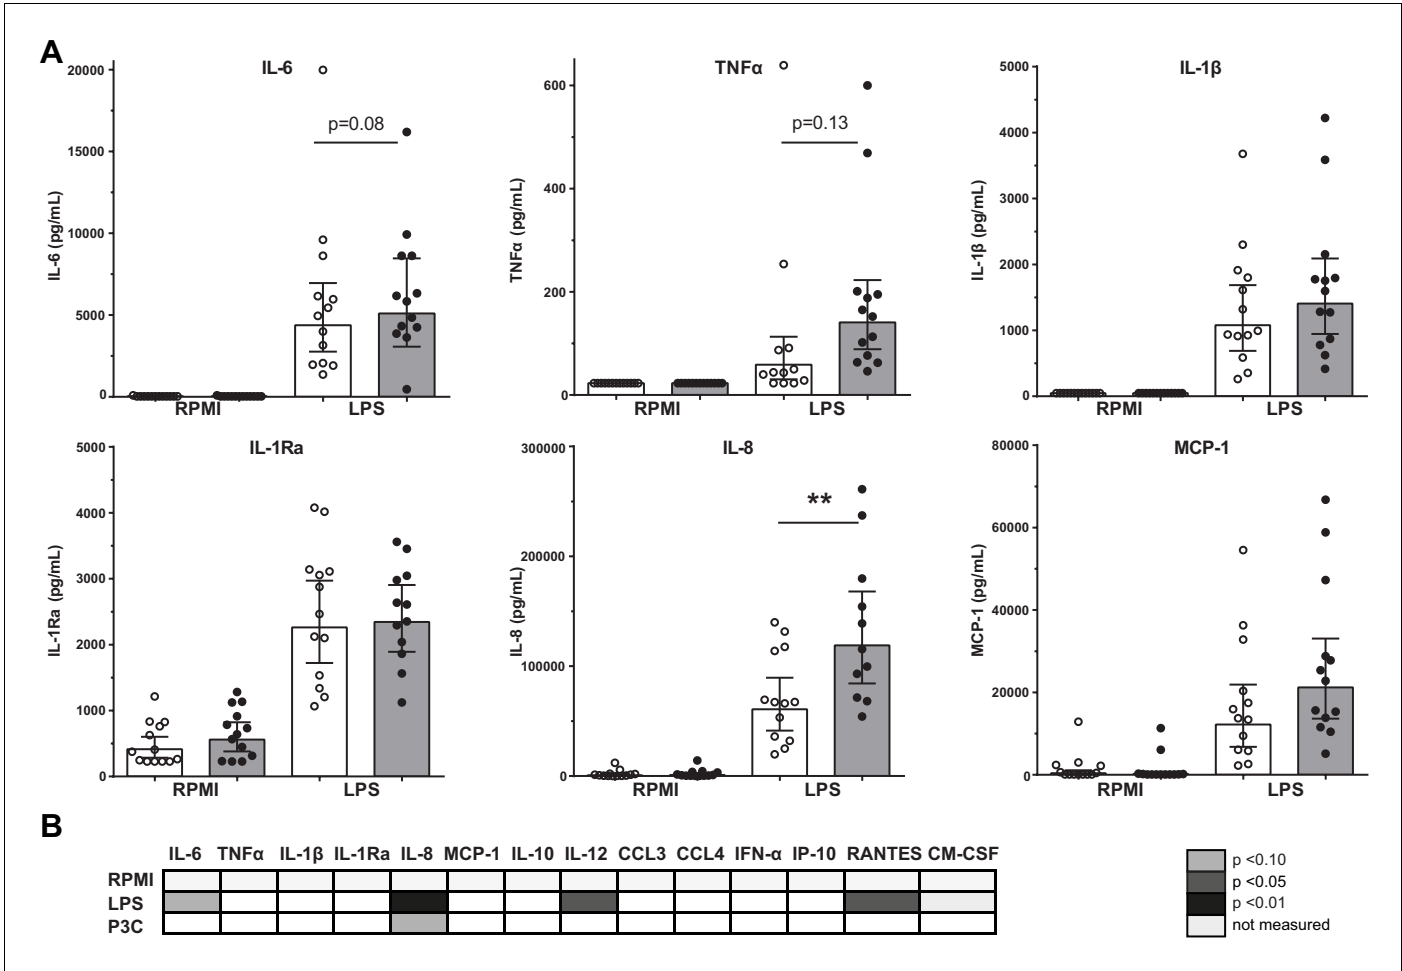

**Figure 1.** Cytokine production capacity of circulating PBMCs. **(A)** Cytokine production capacity of circulating PBMCs after LPS stimulation in control individuals (white bars, n = 13) and individuals with CAD (gray bars, n = 13). Geometric mean with 95% CI. **(B)** Table of cytokine/chemokine production (x-axis) after stimulation with LPS or P3C (y-axis) of PBMCs showing statistical differences between groups. The p-values are corrected for age and BMI with ANCOVA. Outliers were removed with an SD of >2.5 of Z-scores. \* indicates p<0.05, \*\*: p<0.01.

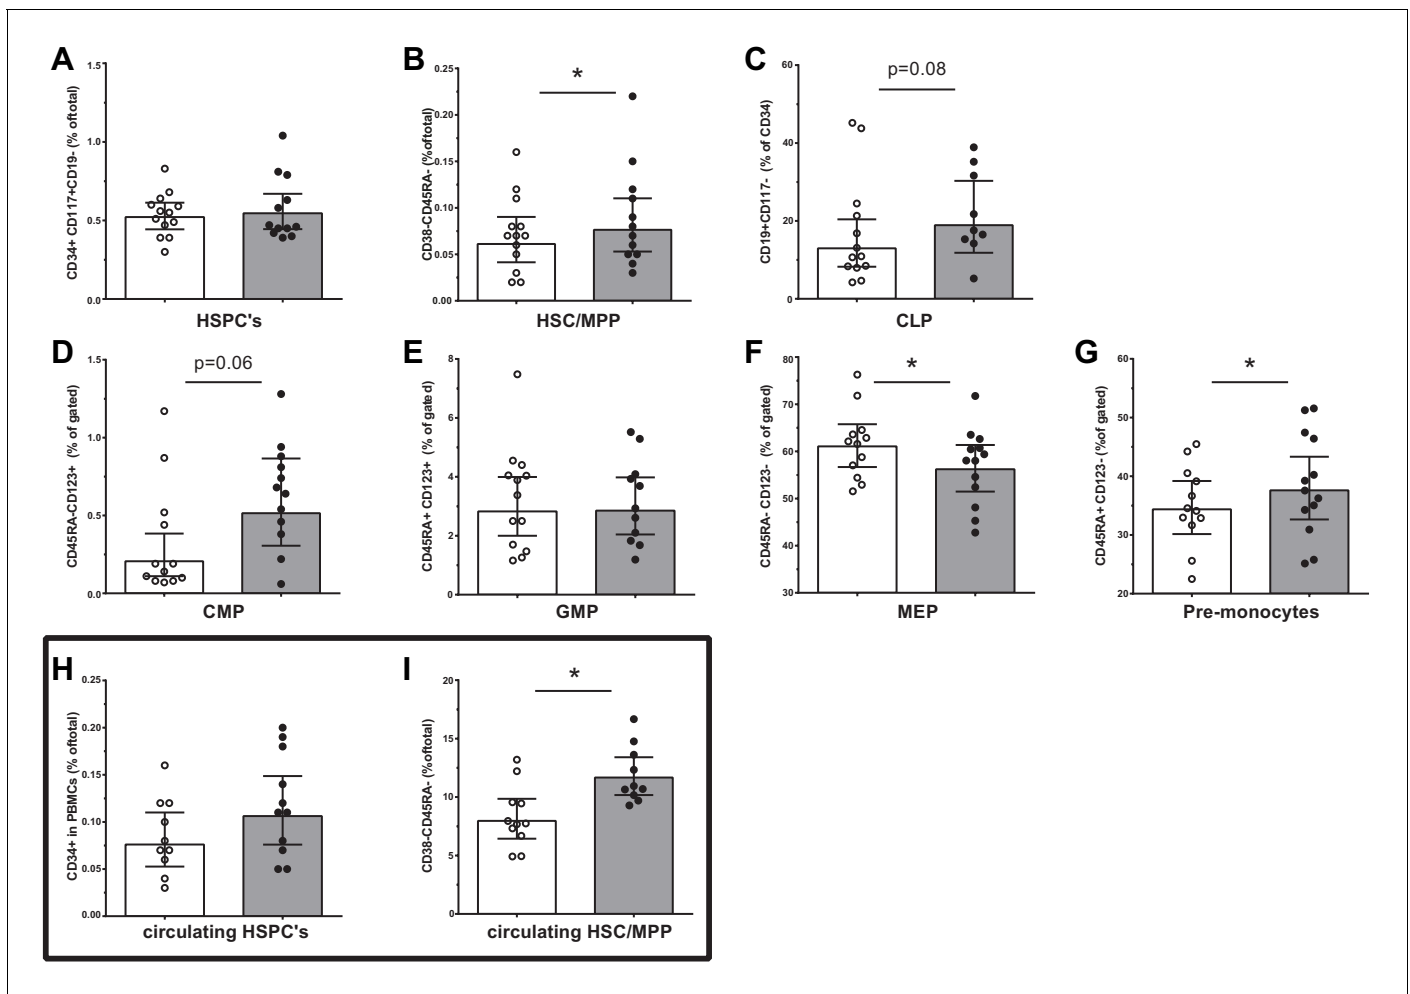

**Figure 2.** Progenitor cell populations in the bone marrow compartment (A–G) and in the circulation (H and I). Control individuals (white bars,  $n = 13$ ) and individuals with CAD (gray bars,  $n = 13$ ). HSC and MPP cell populations were combined as the CD90 expression marker was not available for  $n = 6$  in each study group. Geometric mean with 95% CI. The p-values are corrected for age and BMI with ANCOVA. \* indicates  $p < 0.05$ , \*\*:  $p < 0.01$ . In top-down order: HSC indicates hematopoietic stem cell, MPP: multipotent progenitor, CLP: common lymphoid progenitor, CMP: common myeloid progenitor, GMP: granulocyte-macrophage progenitor, MEP: megakaryocyte erythrocyte progenitor.

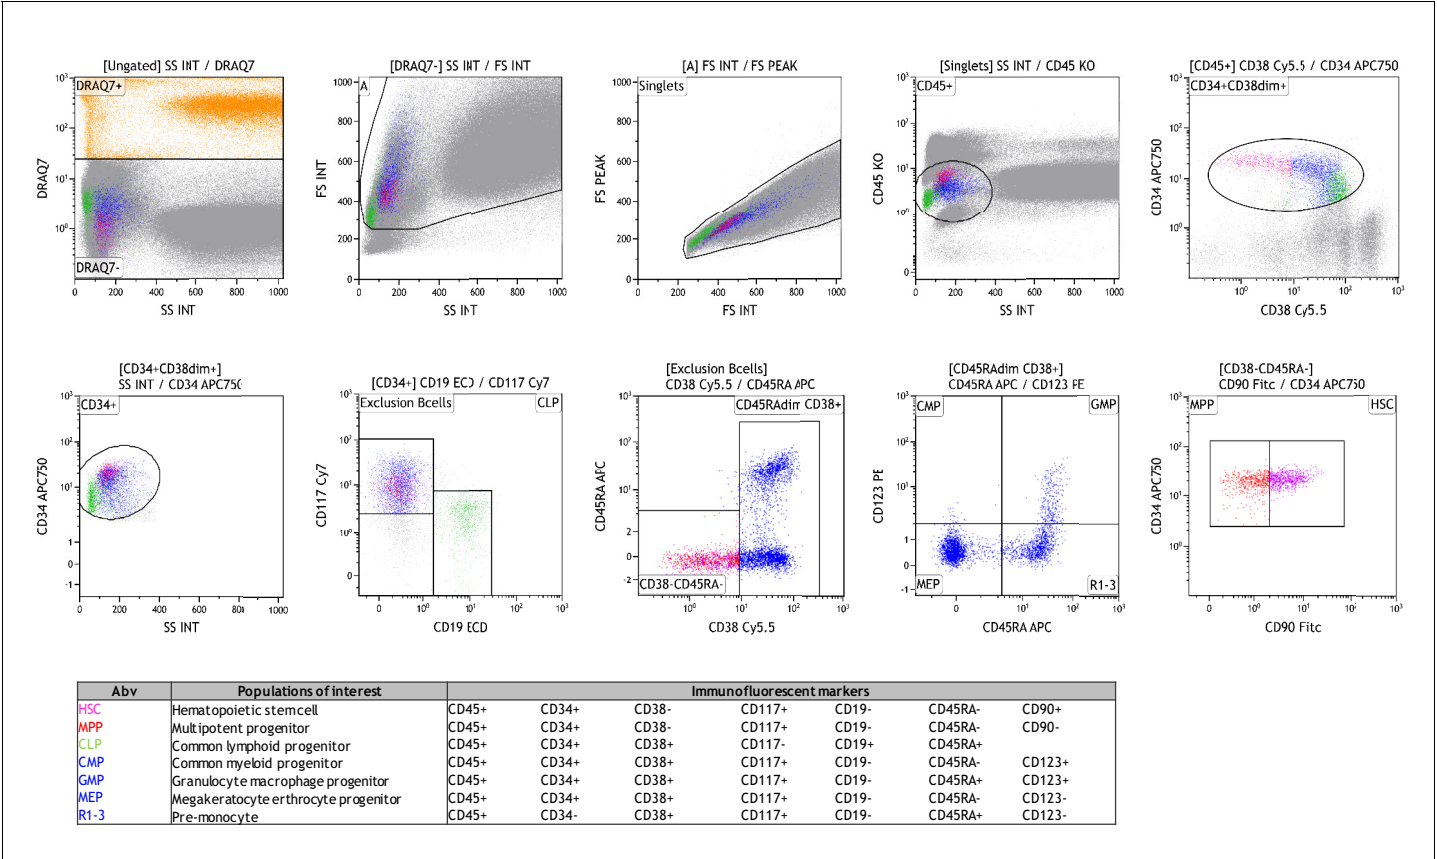

**Figure 2—figure supplement 1.** Gating strategy of hematopoietic stem and progenitor cells in the bone marrow. HSPCs were defined as CD45+CD34+CD38dim cells, after exclusion of dead cells and doublets. Next, the lymphoid lineage was excluded in CD19-CD117+ cells. In CD45RAdimCD38+ cells, CMP, GMP, MEP, and R1-3 progenitor populations were identified using CD123 and CD45RA expression, see Table for details. CD90 expression in CD38-CD45RA- cells determined MPP and HSC populations.

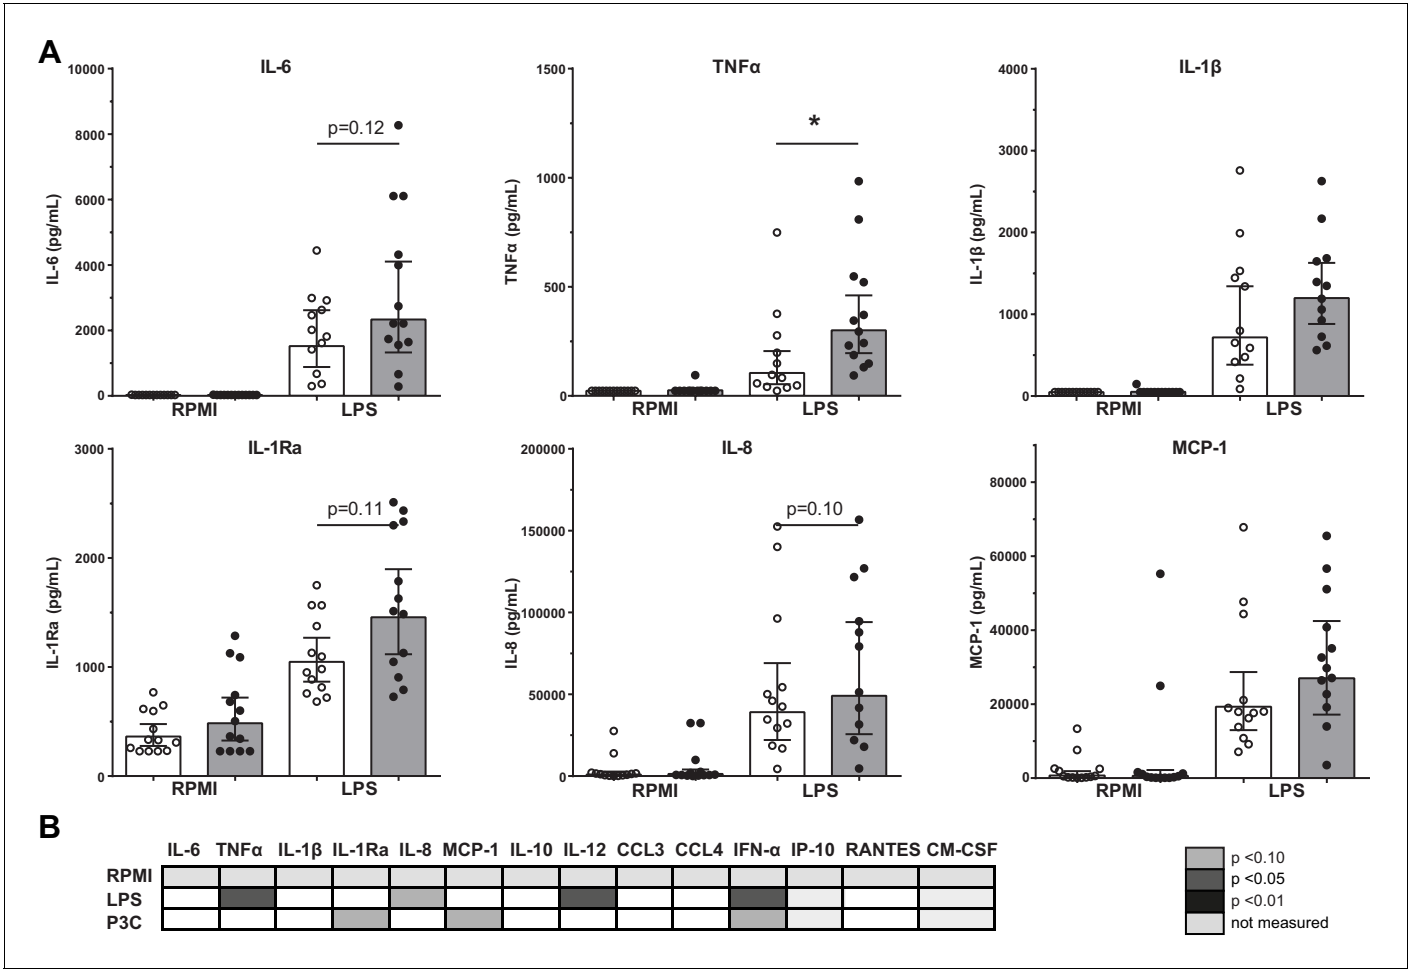

**Figure 3.** Cytokine production capacity of bone marrow MNCs. (A) Cytokine production capacity of BM-MNCs after LPS stimulation in control individuals (white bars, n = 13) and individuals with CAD (gray bars, n = 13). Geometric mean with 95% CI. (B) Table of cytokine/chemokine production (x-axis) after stimulation with LPS or P3C (y-axis) of BM-MNCs showing statistical differences between groups. The p-values are corrected for age and BMI with ANCOVA. Outliers were removed with an SD of >2.5 of Z-scores. \* indicates p<0.05, \*\*: p<0.01.

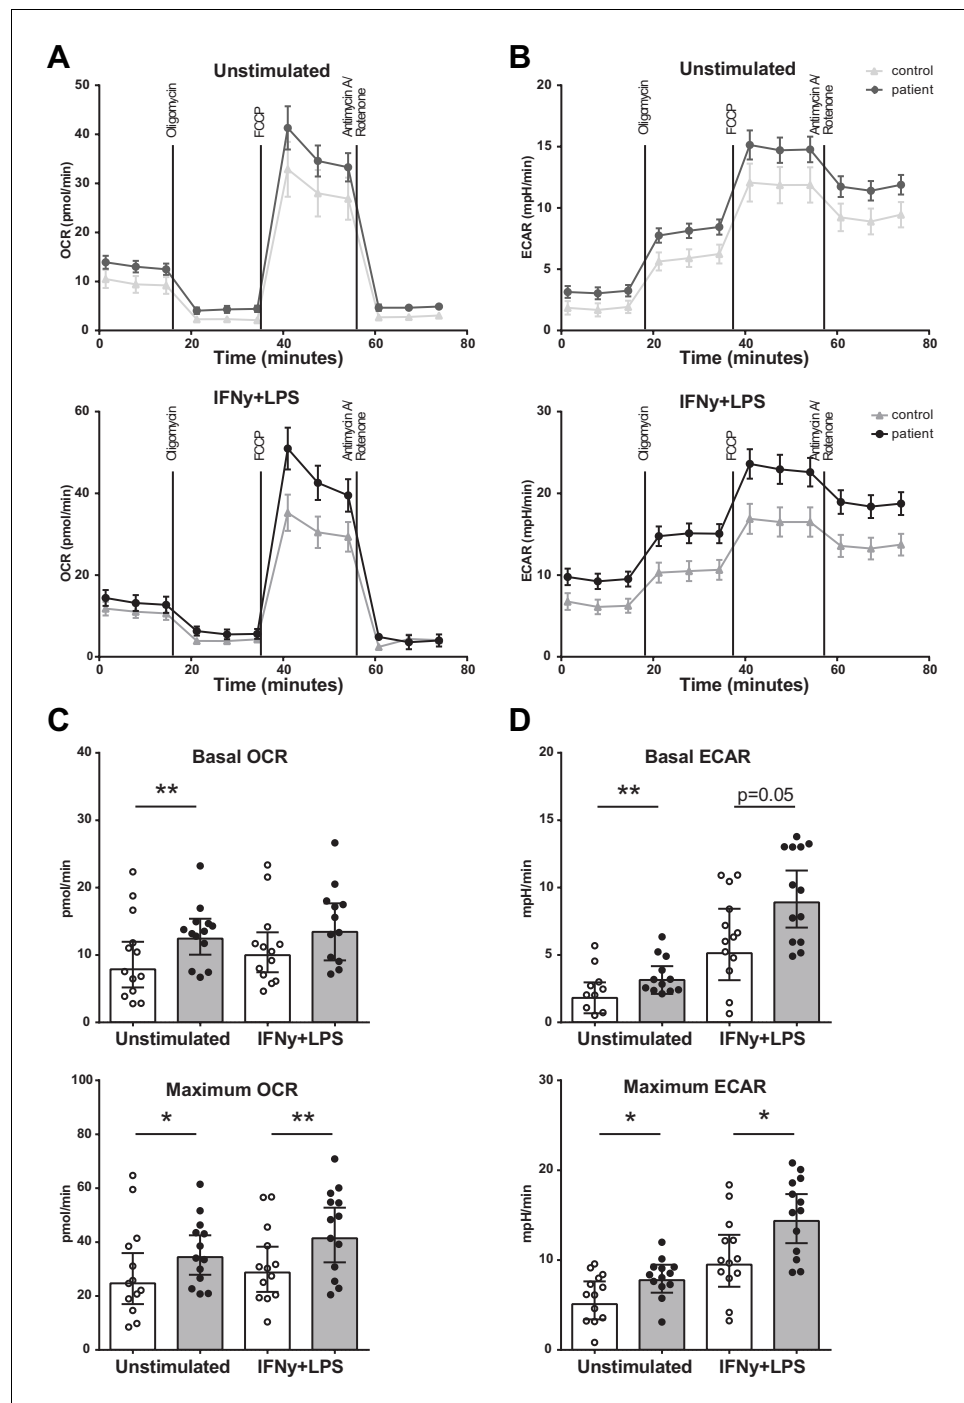

**Figure 4.** Metabolism of BM-MNCs assessed with Seahorse respirometry in unstimulated condition and 2 hours after IFN- $\gamma$ +LPS stimulation. (A, B) Oxygen consumption and extracellular acidification rates over time using treatment with Oligomycin, FCCP, and Rotenone/Antimycin A. (C, D) Bar graphs of control individuals (white bars, n = 13) and individuals with CAD (gray bars, n = 13). Geometric mean with 95% CI. The p-values are corrected for age and BMI with ANCOVA. \* indicates p<0.05, \*\*: p<0.01. IFN- $\gamma$ +LPS: 2 hr IFN- $\gamma$  and LPS stimulation.

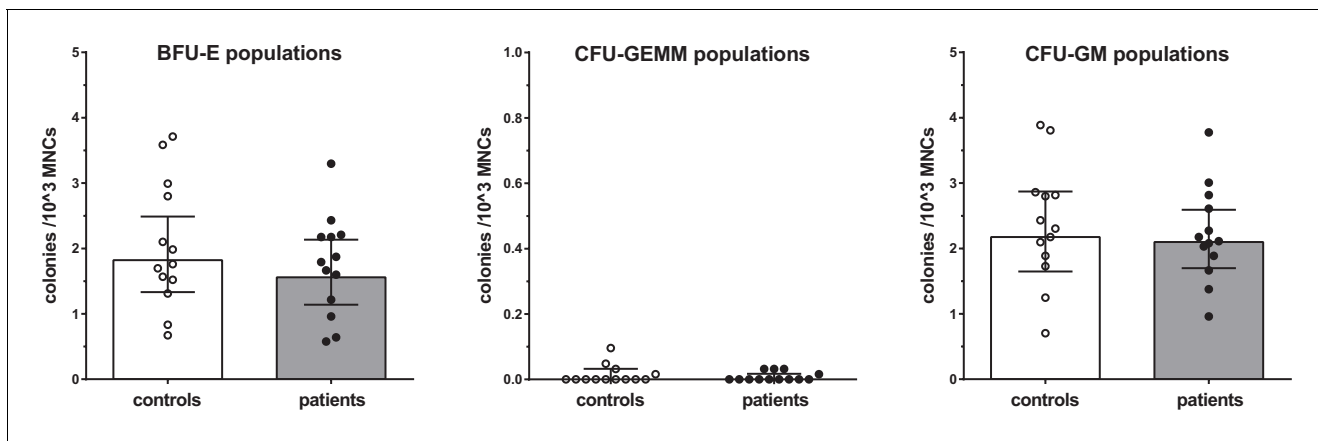

**Figure 5.** Proliferation capacity of bone marrow MNCs. Counted colonies per  $10^3$  cultured BM-MNCs of control individuals (white bars,  $n = 13$ ) and individuals with CAD (gray bars,  $n = 13$ ). Geometric mean with 95% CI. The p-values are corrected for age and BMI with ANCOVA. BFU-E indicates erythroid progenitor population, CFU-GEMM: myeloid progenitor population, CFU-GM: granulocyte-macrophage progenitor population.

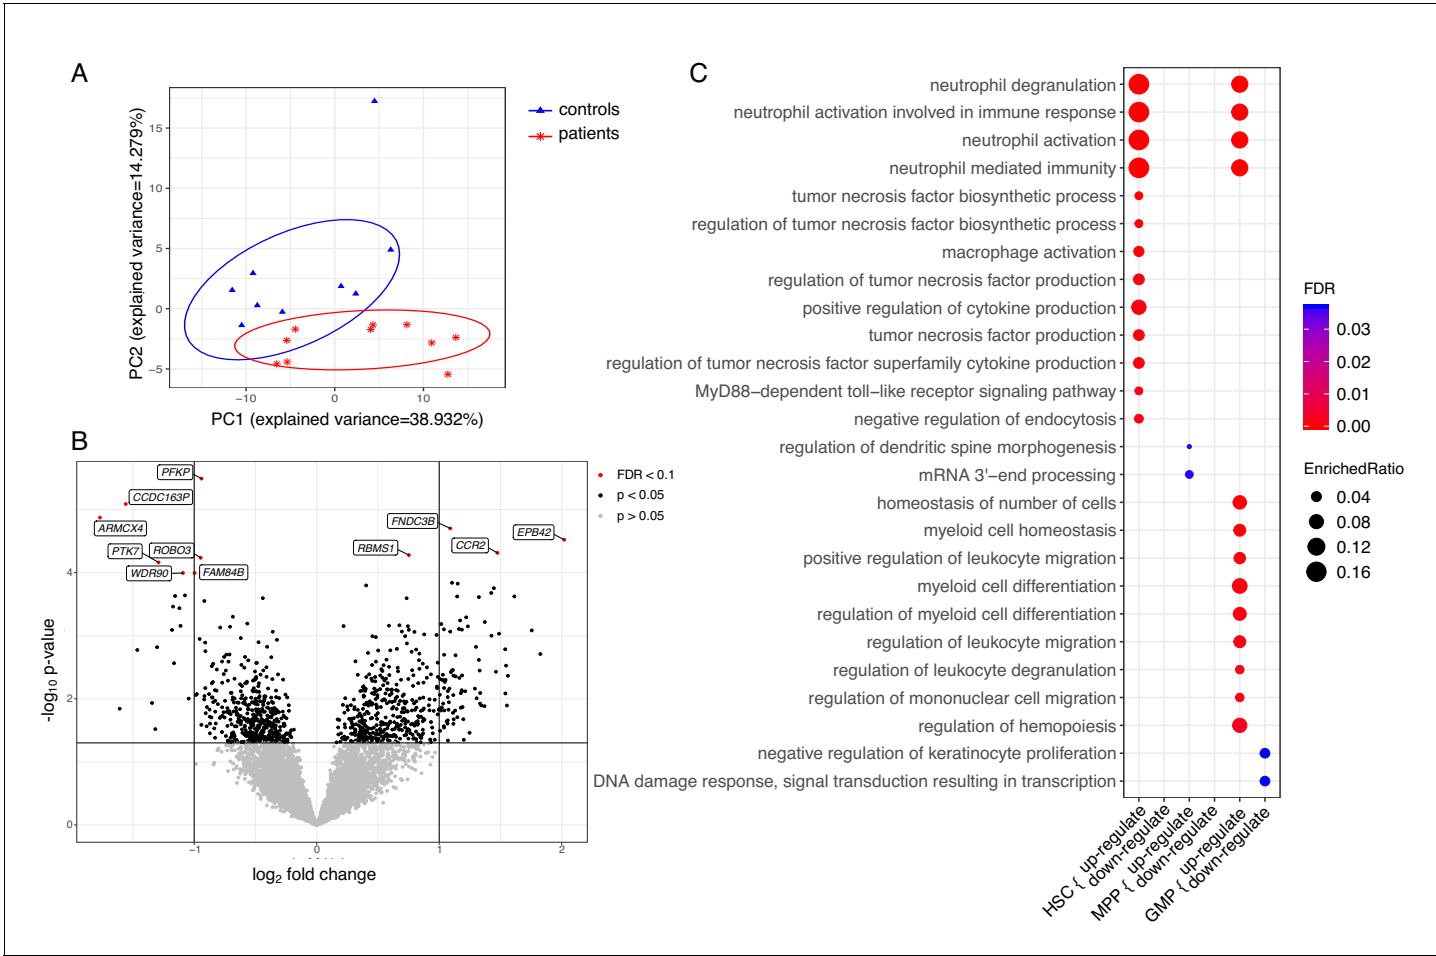

**Figure 6.** Transcriptome analyses of HSC, MPP, and GMP populations. Control individuals (n = 10) versus individuals with CAD (n = 10) for each cell population. (A) Principle component analysis (PCA) based on differentially expressed (DE) genes of the HSC population; (B) Volcano plot showing differential expressed genes between patients with CAD and individuals without atherosclerosis, controlled for age, in a combined analysis of HSC, MPP, and GMP population. Genes with an FDR < 0.1 are named; (C) Gene ontology enrichment analysis of DE genes from HSCs, MPPs, and GMPs, depicting the FDR and enrichment ratio.



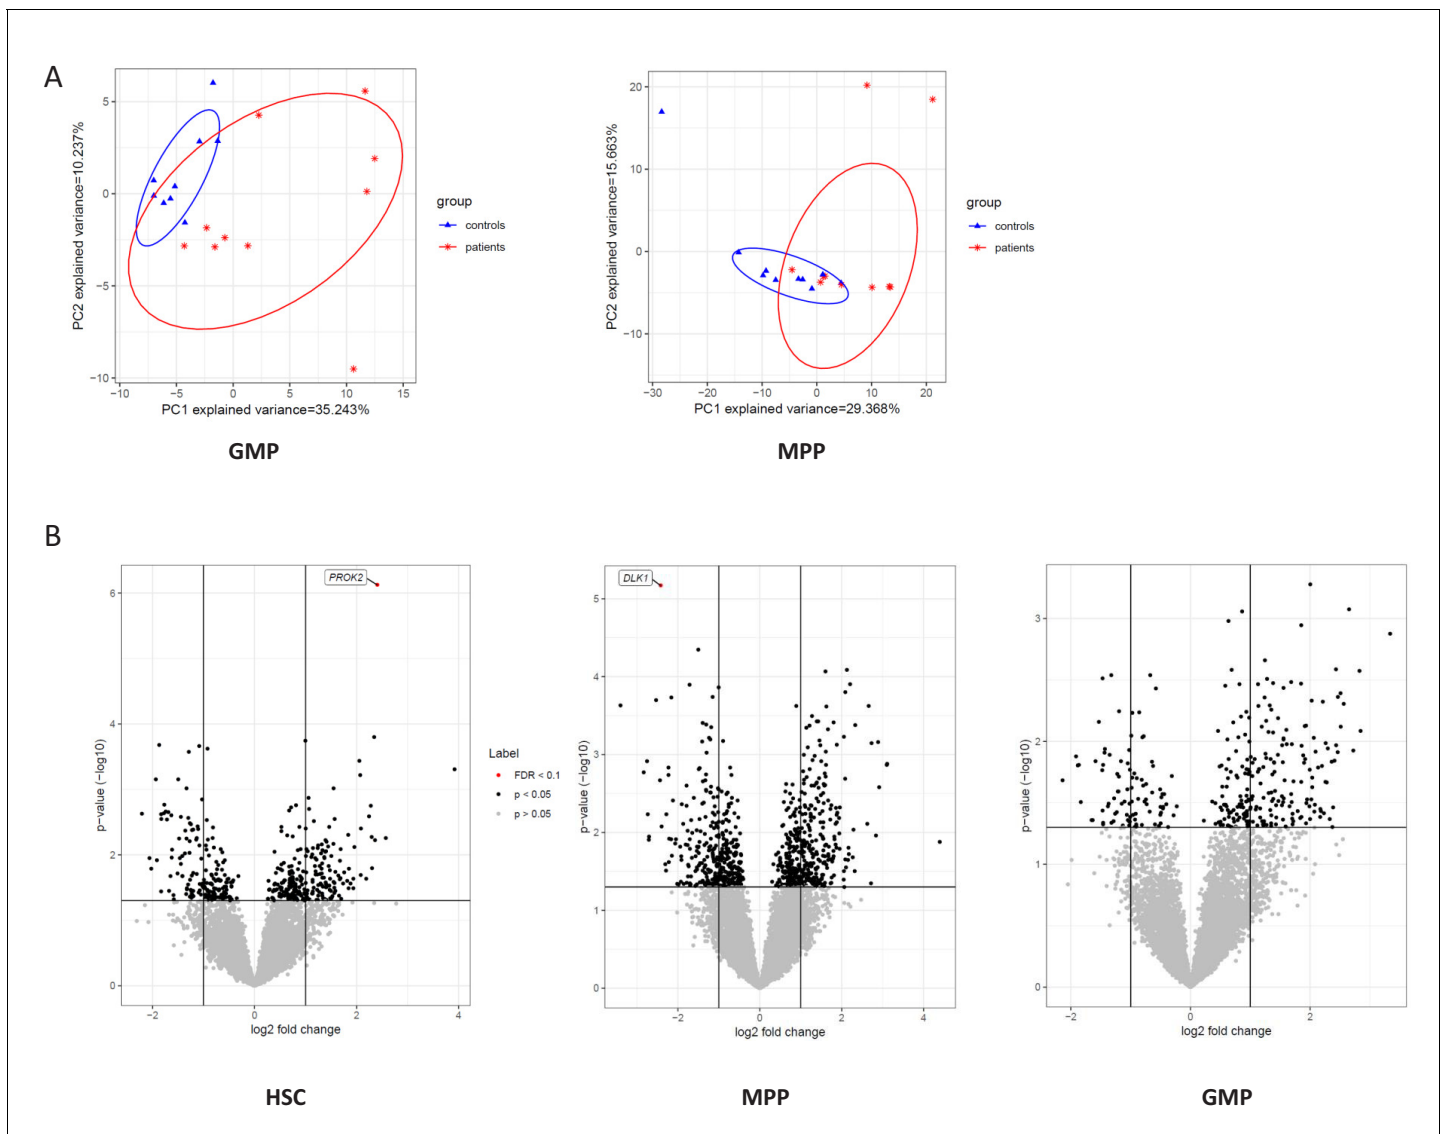

**Figure 6—figure supplement 1.** Transcriptome of HSC, MPP, and GMP populations. (A) PCA analysis based on DE genes of the GMP and MPP cell population; (B) Volcano plot showing differential expressed genes between CAD patients and controls, controlled for age, in the HSC, MPP, and GMP cell populations. Genes with an FDR < 0.1 are called out.

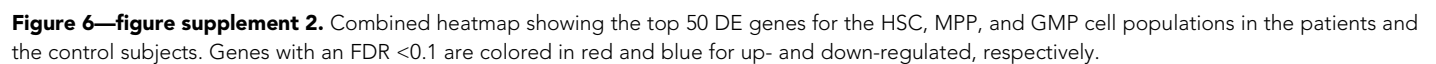

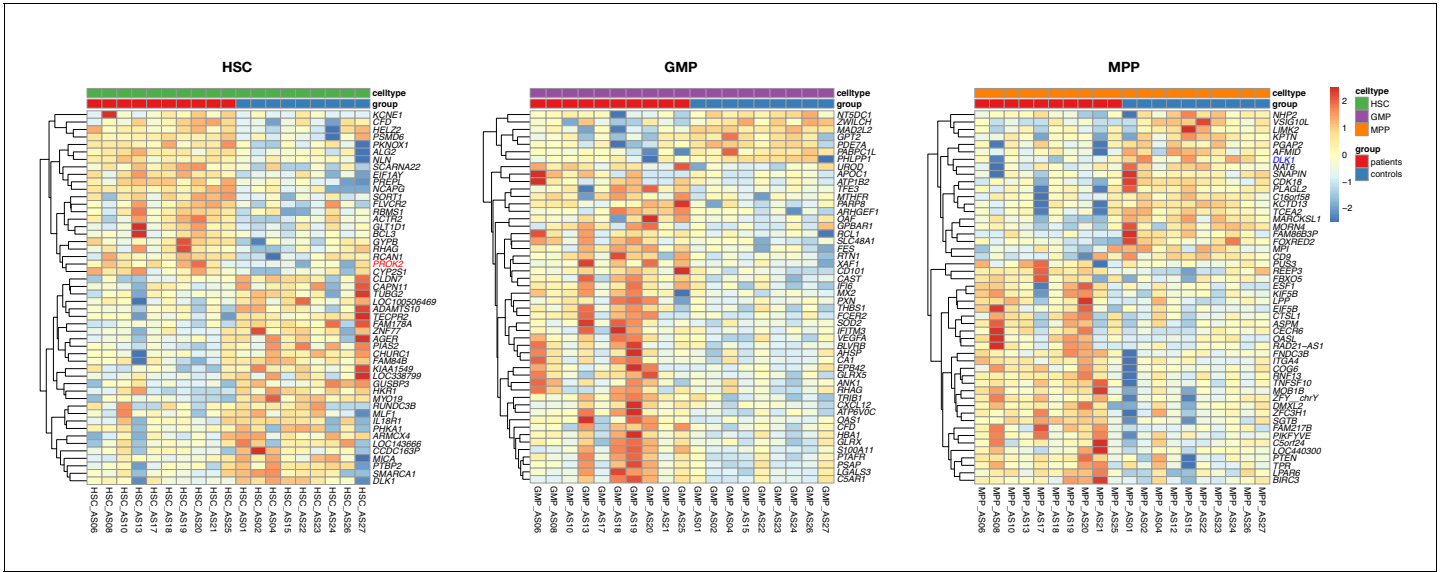

**Figure 6—figure supplement 3.** Separated heatmap showing the top 50 DE genes for each of the HSC, MPP, and GMP cell populations in the patients and the control subjects. Genes with an FDR <0.1 are colored in red and blue for up- and down-regulated, respectively.

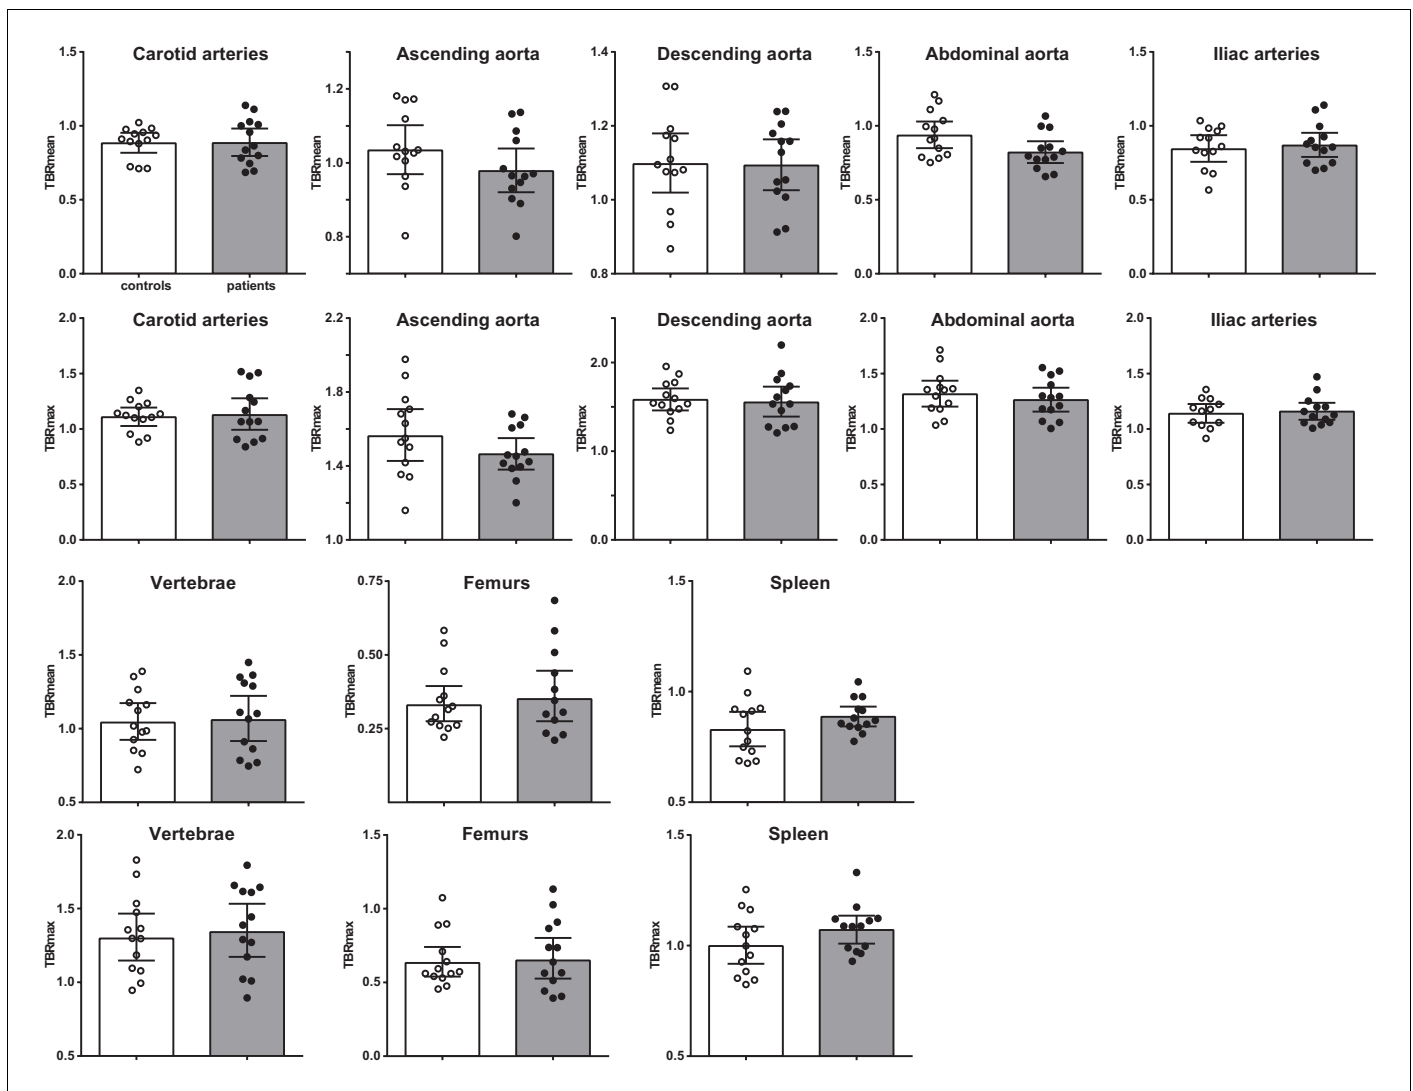

**Figure 7.** Vascular wall inflammation and hematopoietic tissue activation on  $[^{18}\text{F}]\text{FDG}$  PET/CT scan. Standard uptake value of each region in control individuals (white bars,  $n = 13$ ) and individuals with CAD (gray bars,  $n = 13$ ). Geometric mean with 95% CI. The p-values are corrected for age and BMI with ANCOVA. \* indicates  $p < 0.05$ , \*\* :  $p < 0.01$ . TBR: target SUV/mean blood pool SUV or mean liver SUV as background.

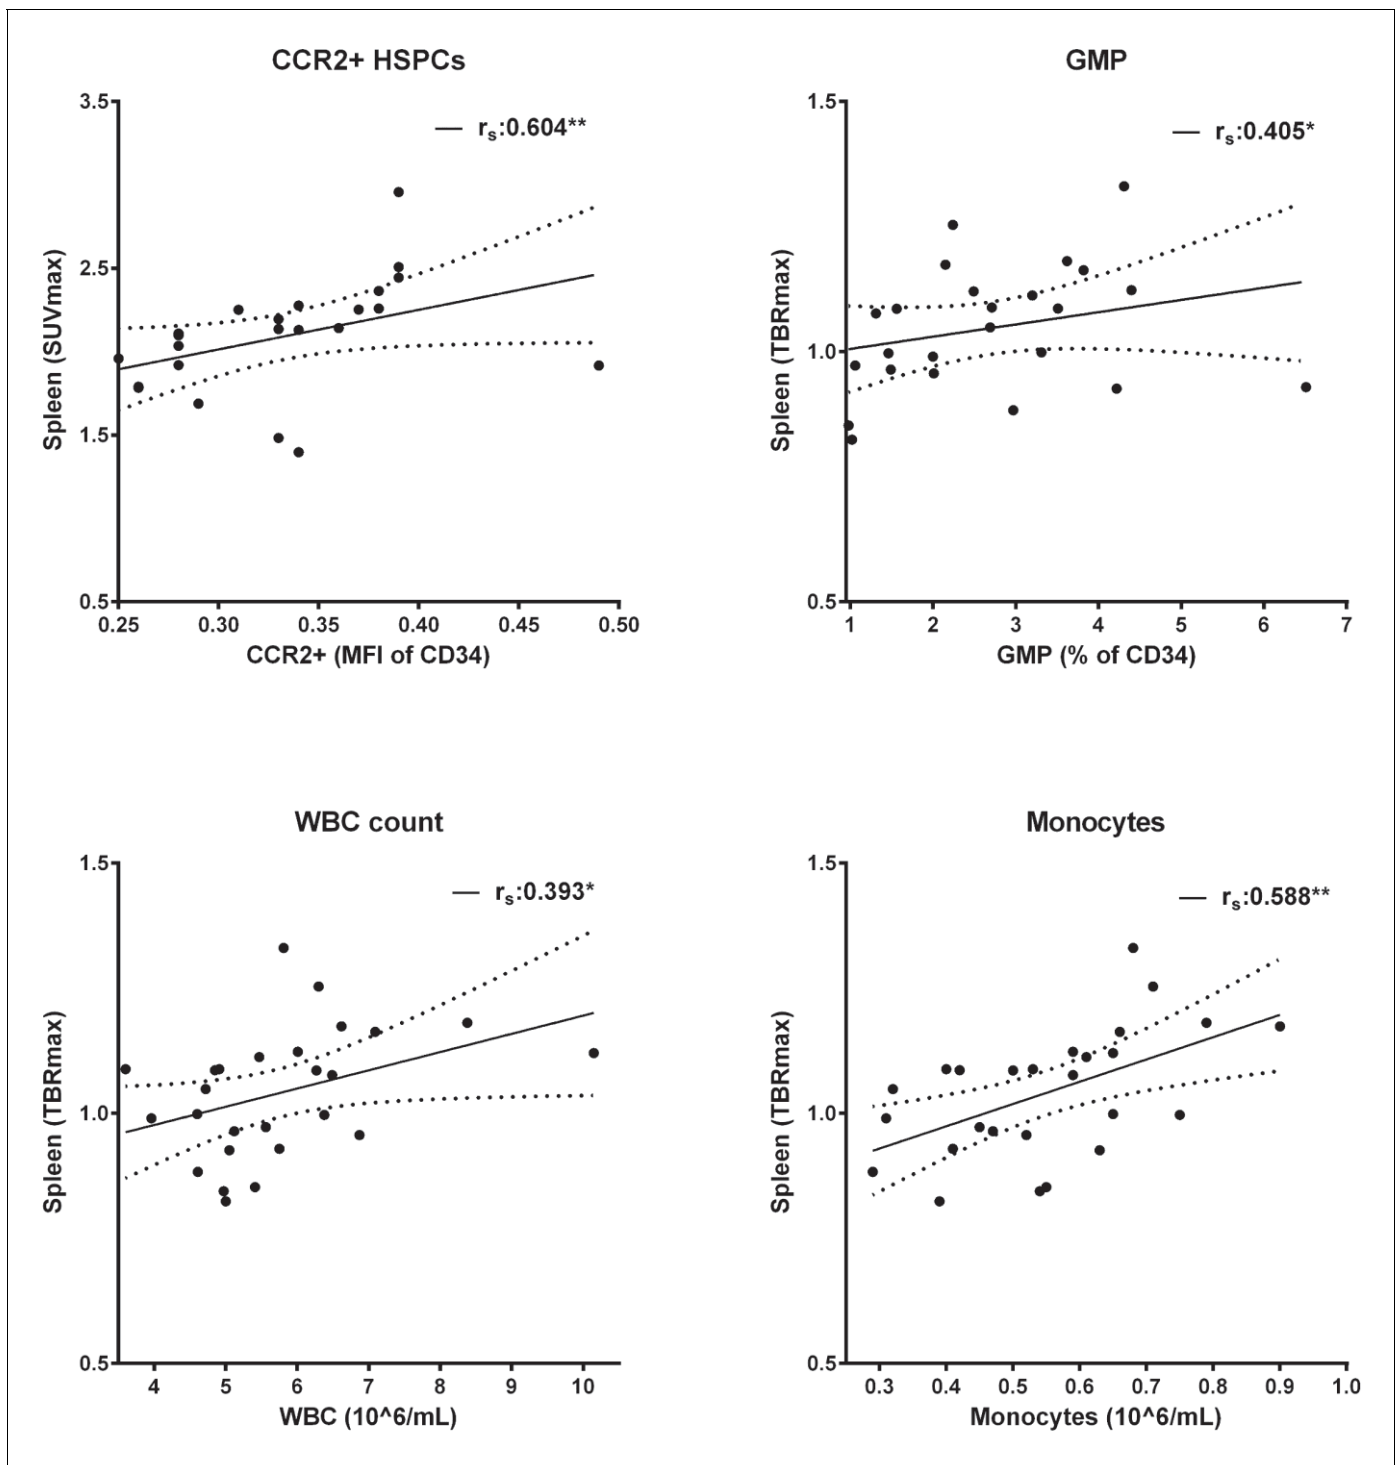

**Figure 7—figure supplement 1.** Splenic activity correlates with progenitor cells and circulating immune cells. Linear regression with 95% CI ( $n = 26$ ). Spearman correlation coefficient ( $r_s$ ). \* indicates  $p < 0.05$ , \*\*:  $p < 0.01$ . HSPCs: hematopoietic stem and progenitor cells, GMP: granulocyte macrophage progenitor cells, WBC: white blood cells.
