# Supplementary material for: Reprogramming of bone marrow myeloid progenitor cells in patients with severe coronary artery disease
Source: eLife journal article supplement (doi:10.7554/elife.60939), 2020-11-09
Supplement: supp [file elife-60939-supp-v1.zip]

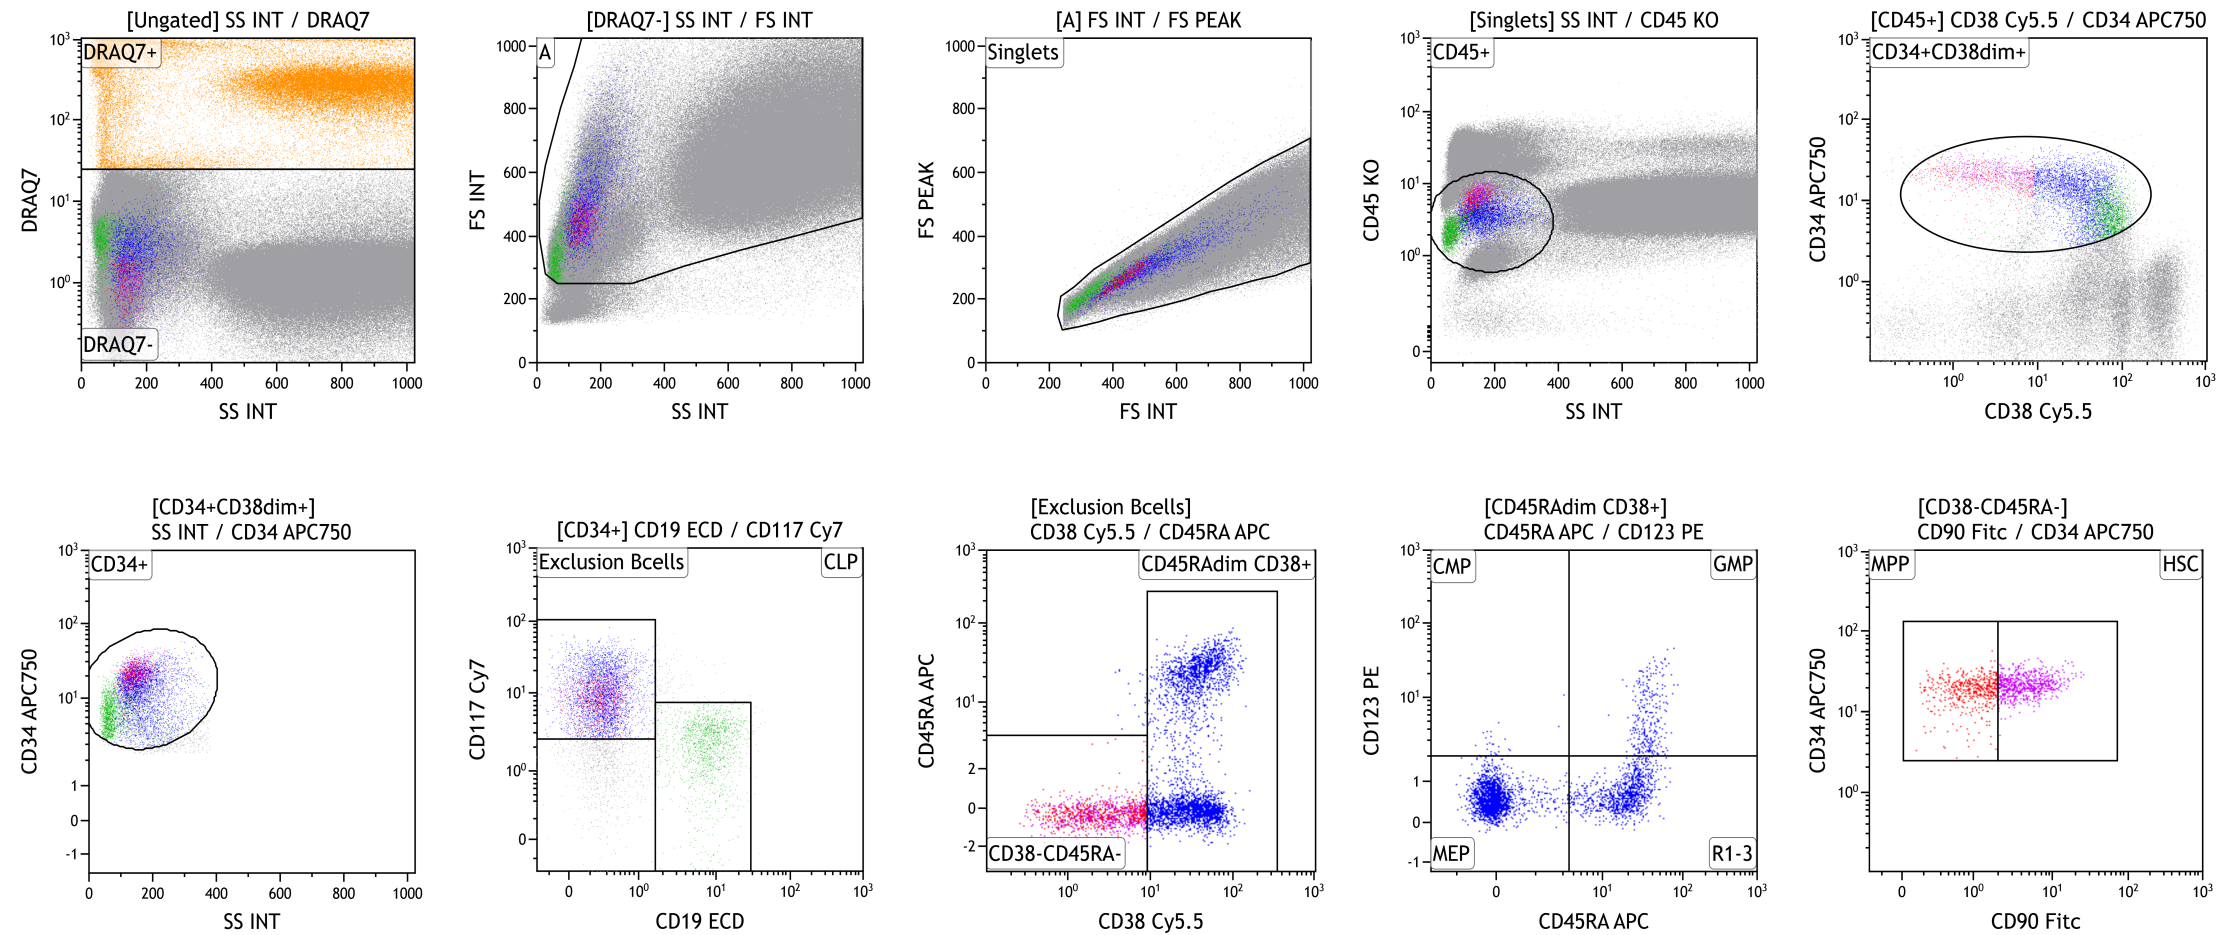

| Abv  | Populations of interest              | Immunofluorescent markers |       |       |        |       |         |        |
|------|--------------------------------------|---------------------------|-------|-------|--------|-------|---------|--------|
| HSC  | Hematopoietic stemcell               | CD45+                     | CD34+ | CD38- | CD117+ | CD19- | CD45RA- | CD90+  |
| MPP  | Multipotent progenitor               | CD45+                     | CD34+ | CD38- | CD117+ | CD19- | CD45RA- | CD90-  |
| CLP  | Common lymphoid progenitor           | CD45+                     | CD34+ | CD38+ | CD117- | CD19+ | CD45RA+ |        |
| CMP  | Common myeloid progenitor            | CD45+                     | CD34+ | CD38+ | CD117+ | CD19- | CD45RA+ | CD123+ |
| GMP  | Granulocyte macrophage progenitor    | CD45+                     | CD34+ | CD38+ | CD117+ | CD19- | CD45RA+ | CD123+ |
| MEP  | Megakaryocyte erythrocyte progenitor | CD45+                     | CD34+ | CD38+ | CD117+ | CD19- | CD45RA- | CD123- |
| R1-3 | Pre-monocyte                         | CD45+                     | CD34- | CD38+ | CD117+ | CD19- | CD45RA+ | CD123- |
