# Supplementary material for: Reprogramming of bone marrow myeloid progenitor cells in patients with severe coronary artery disease
Source: eLife journal article supplement (doi:10.7554/elife.60939), 2020-11-09
Supplement: supp [file elife-60939-supp-v1.zip]

Archive with 9 entries (9 files):
- elife_poa_e60939_Figure_2_figure_supplement_1.pdf
- elife_poa_e60939_Figure_2_figure_supplement_2.pdf
- elife_poa_e60939_Figure_6_figure_supplement_1.pdf
- elife_poa_e60939_Figure_6_figure_supplement_2.pdf
- elife_poa_e60939_Figure_6_figure_supplement_3.pdf
- elife_poa_e60939_Figure_7_figure_supplement_1.pdf
- elife_poa_e60939_Transparent_Reporting_File.docx
- elife_poa_e60939_Figure_6_source_data_1.xlsx
- elife_poa_e60939_Figure_6_source_data_2.xlsx
