# Supplementary material for: Reprogramming of bone marrow myeloid progenitor cells in patients with severe coronary artery disease
Source: eLife journal article supplement (doi:10.7554/elife.60939), 2020-11-09
Supplement: supp [file elife-60939-supp-v1.zip › elife_poa_e60939_Figure_2_figure_supplement_1.pdf]

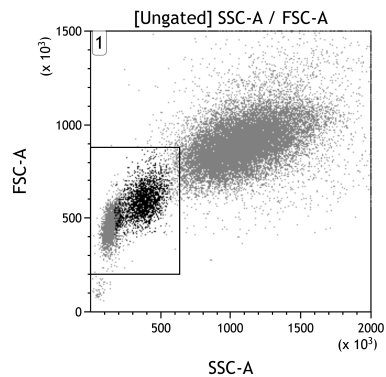

| Gate | Number | %Gated |
|------|--------|--------|
| All  | 26.859 | 100,00 |
| 1    | 5.614  | 20,90  |

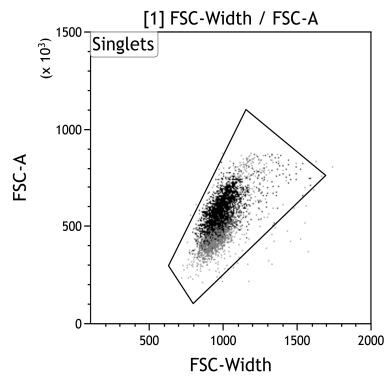

| Gate     | %Gated |
|----------|--------|
| All      | 100,00 |
| Singlets | 99,54  |

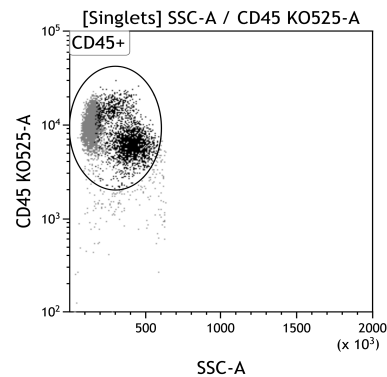

| Gate  | %Gated |
|-------|--------|
| All   | 100,00 |
| CD45+ | 96,66  |

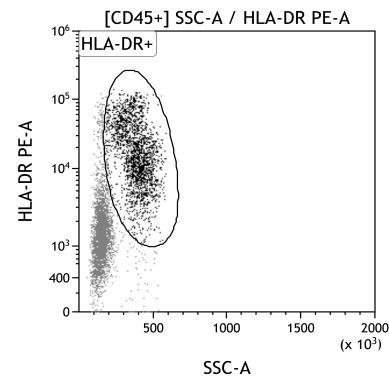

| Gate    | %Gated |
|---------|--------|
| All     | 100,00 |
| HLA-DR+ | 39,94  |

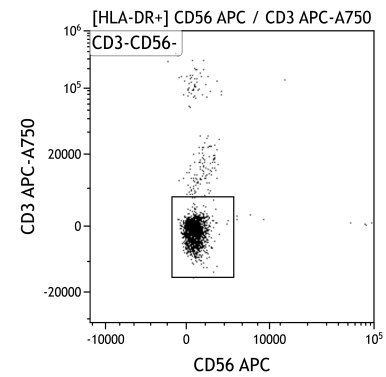

| Gate      | %Gated |
|-----------|--------|
| All       | 100,00 |
| CD3-CD56- | 91,32  |

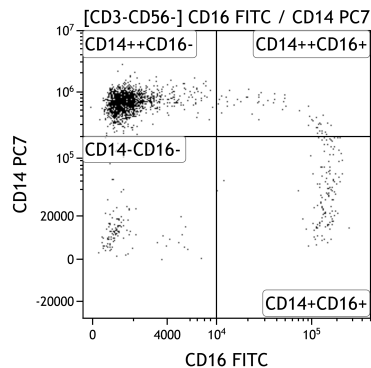

| Gate        | Number | %Gated |
|-------------|--------|--------|
| All         | 1.842  | 100,00 |
| CD14-CD16-  | 117    | 6,35   |
| CD14++CD16- | 1.545  | 83,88  |
| CD14++CD16+ | 53     | 2,88   |
| CD14-CD16+  | 127    | 6,89   |

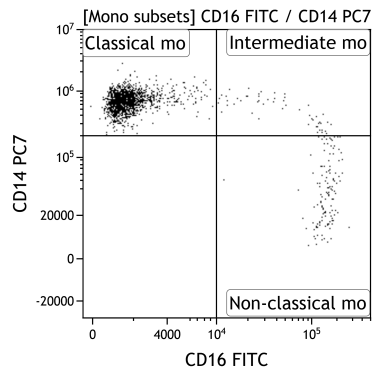

| Gate             | Number | %Gated |
|------------------|--------|--------|
| All              | 1.725  | 100,00 |
| Classical mo     | 1.545  | 89,57  |
| Intermediate mo  | 53     | 3,07   |
| J--              | 0      | 0,00   |
| Non-classical mo | 127    | 7,36   |

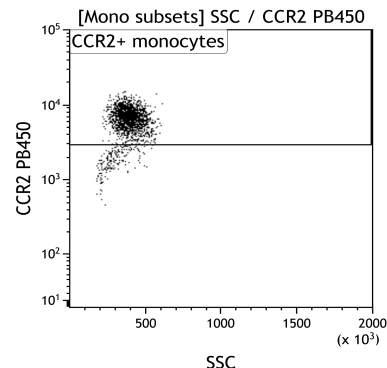

| Gate            | Number   | %Gated |
|-----------------|----------|--------|
| All             | 1.725    | 100,00 |
| CCR2+ monocytes | 1.541    | 89,33  |
| Gate            | Y-GMean  |        |
| All             | 5.644,22 |        |
| CCR2+ monocytes | 6.481,42 |        |

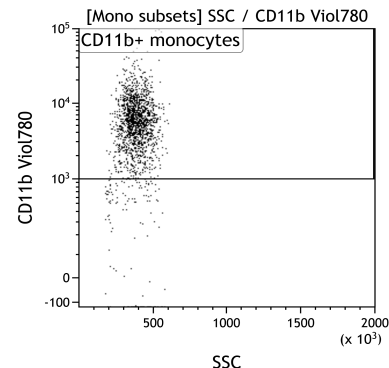

| Gate             | Number | %Gated |
|------------------|--------|--------|
| All              | 1.725  | 100,00 |
| CD11b+ monocytes | 1.595  | 92,46  |

  

| Gate             | Y-GMean  |
|------------------|----------|
| All              | 4.260,12 |
| CD11b+ monocytes | 5.536,82 |

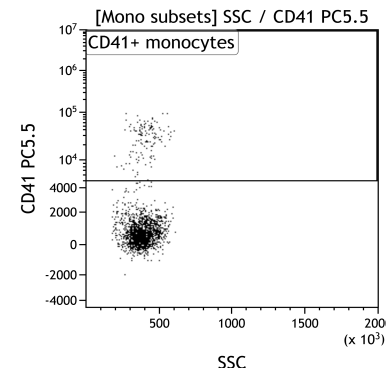

| Gate            | Number | %Gated |
|-----------------|--------|--------|
| All             | 1.725  | 100,00 |
| CD41+ monocytes | 131    | 7,59   |

  

| Gate            | Y-GMean   |
|-----------------|-----------|
| All             | 1.147,16  |
| CD41+ monocytes | 24.909,29 |
