# Supplementary material for: Reprogramming of bone marrow myeloid progenitor cells in patients with severe coronary artery disease
Source: eLife journal article supplement (doi:10.7554/elife.60939), 2020-11-09
Supplement: supp [file elife-60939-supp-v1.zip › elife_poa_e60939_Figure_6_source_data_1.xlsx]

## Sheet: Combined_3celltypes
gene	Log2_FoldChange	lfcSE	pvalue	adjusted_pvalue
PFKP	-0.940197	0.201942	3.22765e-06	0.0313728
CCDC163P	-1.55888	0.349463	8.16584e-06	0.039686
ARMCX4	-1.76948	0.406392	1.33601e-05	0.0432868
FNDC3B	1.09087	0.255708	1.98935e-05	0.0483413
EPB42	2.02006	0.484041	3.00196e-05	0.0583582
CCR2	1.47576	0.363266	4.85545e-05	0.0706468
RBMS1	0.75217	0.18601	5.26111e-05	0.0706468
ROBO3	-0.946922	0.23554	5.81455e-05	0.0706468
PTK7	-1.29092	0.324334	6.88465e-05	0.0743542
FAM84B	-0.996717	0.256407	0.000101388	0.0895905
WDR90	-1.09178	0.280837	0.000101233	0.0895905
ANK1	1.42547	0.384544	0.00020981	0.107485
BCL7B	-0.439703	0.120192	0.000253861	0.107485
FGL2	1.15119	0.303602	0.000149577	0.107485
GRASP	-1.15587	0.314211	0.000234471	0.107485
GRIK5	-1.0753	0.291878	0.000229547	0.107485
IL1RN	1.32445	0.361038	0.000244029	0.107485
LPAR6	1.44655	0.385673	0.00017633	0.107485
PROK2	1.61383	0.439202	0.000238357	0.107485
RIOK3	0.734219	0.200724	0.000254338	0.107485
SGTB	1.10504	0.2908	0.00014469	0.107485
SNAPC3	1.14713	0.312231	0.000238802	0.107485
ZMAT2	0.404215	0.107055	0.000159506	0.107485
MICA	-0.916736	0.252421	0.000281482	0.114
TUBG2	-1.17284	0.327704	0.000344947	0.134115
LOC100506469	-1.12066	0.31449	0.000366081	0.136858
CALM2	0.21974	0.0648541	0.000703483	0.169103
CAPN7	-0.684485	0.196638	0.00049965	0.169103
CD93	1.03878	0.309562	0.000791829	0.169103
CFD	1.18522	0.353553	0.000801374	0.169103
CHRAC1	-0.358509	0.107622	0.000864799	0.169103
CHURC1	-0.707302	0.209162	0.000720637	0.169103
FAM118A	1.17125	0.340064	0.000572754	0.169103
FBXO44	-1.18055	0.35245	0.000809416	0.169103
FKBP15	0.695144	0.208555	0.00085871	0.169103
HPS4	-0.566244	0.165912	0.000642716	0.169103
KCNE3	1.37248	0.400279	0.000606226	0.169103
KIF3B	0.744757	0.219873	0.000706073	0.169103
LFNG	1.23397	0.36451	0.000711066	0.169103
LGALS3	1.22057	0.351242	0.000510837	0.169103
LOC143666	-1.11176	0.327915	0.000697906	0.169103
LYST	1.16247	0.346045	0.000781386	0.169103
MAN2B1	0.589718	0.173834	0.000692775	0.169103
MT-TM	0.75204	0.224431	0.00080558	0.169103
P2RX1	-0.787429	0.233412	0.000742041	0.169103
RBM47	1.0902	0.32713	0.000860296	0.169103
RHAG	1.75583	0.524975	0.000824027	0.169103
RNF13	0.675663	0.19894	0.000683013	0.169103
SGPP1	0.798122	0.239709	0.000869872	0.169103
SLC16A3	1.01687	0.298322	0.000652851	0.169103
CA1	1.42715	0.433685	0.00099916	0.176913
CAMK1	1.48865	0.449568	0.000928627	0.176913
CECR1	0.878004	0.26573	0.000952756	0.176913
HAT1	0.455202	0.138563	0.00101925	0.176913
MICAL2	0.978756	0.296729	0.000972082	0.176913
N4BP1	0.722549	0.219887	0.00101623	0.176913
ABCB10	0.483546	0.147599	0.00105257	0.179491
NPM3	-0.619624	0.189697	0.00108927	0.182546
RHPN1	-0.955462	0.293351	0.00112574	0.18546
NDUFB6	-0.324331	0.0998418	0.00116037	0.18798
PABPC1L	-0.909938	0.282658	0.00128542	0.201521
PPP1R15A	-0.474408	0.147192	0.00126833	0.201521
TNFSF10	0.736433	0.229403	0.00132636	0.204639
ETS2	-0.404369	0.12734	0.00149574	0.224027
GYPB	1.30125	0.409916	0.00150135	0.224027
ZNF77	-1.30245	0.410788	0.00152117	0.224027
ASAP1	0.812207	0.258183	0.00165599	0.231539
DNTTIP2	0.601175	0.191609	0.00170393	0.231539
HLA-C	0.502146	0.160144	0.00171511	0.231539
LGALS2	1.53938	0.48886	0.00163873	0.231539
TNFSF13B	0.654518	0.207587	0.00161616	0.231539
WDR55	-1.46421	0.466136	0.00168281	0.231539
MZF1	-0.908201	0.290306	0.00175747	0.234008
CAST	0.774848	0.248225	0.00179897	0.236298
ACTR3	0.41943	0.134873	0.00187205	0.242618
ACER3	0.838779	0.27039	0.0019215	0.24347
BRAT1	-0.711503	0.230051	0.00198276	0.24347
HBA1	1.04091	0.3369	0.00200387	0.24347
NMU	1.82624	0.589563	0.00195082	0.24347
SPATA20	-0.736987	0.238429	0.00199475	0.24347
VNN2	1.1337	0.367607	0.00204232	0.245078
HPS1	-0.370359	0.12092	0.00219253	0.253707
LMAN2L	-0.584751	0.190719	0.00216914	0.253707
TCEA2	-0.75535	0.246353	0.00216855	0.253707
BAZ1A	0.569964	0.187733	0.00239719	0.271044
FAM89A	0.835434	0.275741	0.0024473	0.271044
PLA2G6	-0.558302	0.184321	0.0024539	0.271044
THBS1	1.32393	0.436389	0.0024147	0.271044
GTF2A2	0.316885	0.105011	0.00254757	0.272033
HN1	0.483651	0.160444	0.00257441	0.272033
LEPRE1	-0.719828	0.238796	0.0025748	0.272033
RFNG	-0.772428	0.256135	0.00256383	0.272033
MEGF9	0.866263	0.289537	0.00277256	0.275943
MSH6	-0.488664	0.162834	0.00269106	0.275943
PROSER1	-0.492657	0.164274	0.0027087	0.275943
RPH3AL	-1.16421	0.388511	0.00273005	0.275943
RTN2	-0.844659	0.282416	0.00278214	0.275943
SULF2	0.987372	0.328755	0.00267008	0.275943
INPP5B	-0.614105	0.206212	0.00290107	0.28204
MT-RNR1	0.452774	0.152102	0.00291296	0.28204
PREPL	0.546331	0.183646	0.00293066	0.28204
KCNH2	1.54588	0.520574	0.00298209	0.284176
CTU1	-0.856114	0.288787	0.00303153	0.286082
ABCA2	-0.590603	0.200424	0.00321117	0.289573
DCTD	-0.410032	0.138896	0.00315643	0.289573
MAP4K4	0.661509	0.224533	0.00321748	0.289573
WARS	0.591587	0.200084	0.00310962	0.289573
ZHX3	0.89976	0.304954	0.00317282	0.289573
ABCD3	0.528193	0.180263	0.00338827	0.297003
APOC1	1.33053	0.456584	0.00356724	0.297003
CCNB1IP1	-0.435252	0.149265	0.0035458	0.297003
CD9	-0.741786	0.254471	0.00355676	0.297003
CTSS	0.780331	0.267422	0.0035231	0.297003
LILRB1	1.11175	0.380718	0.00349878	0.297003
LINC00263	-0.81519	0.278548	0.00342725	0.297003
OSTM1	0.838796	0.285911	0.0033488	0.297003
SERPINA1	1.10282	0.378531	0.00357503	0.297003
REEP3	0.536551	0.184432	0.00362337	0.298467
KIAA2018	0.664051	0.228554	0.00366735	0.299112
SSBP3	-0.503865	0.173558	0.00369425	0.299112
TMCC2	1.46321	0.504436	0.00372352	0.299112
SECTM1	1.09614	0.378542	0.00378339	0.301431
AHSP	1.13428	0.398435	0.00441567	0.309372
AKR1C3	-0.493271	0.174561	0.00471662	0.309372
CALCOCO2	0.335483	0.117048	0.00415446	0.309372
CASP4	0.477657	0.168191	0.00451186	0.309372
EIF1AY	0.428933	0.149398	0.00409088	0.309372
EIF5B	0.565751	0.200502	0.00477732	0.309372
EPB41L3	0.789636	0.276103	0.00423726	0.309372
EPDR1	-0.507462	0.18054	0.00494193	0.309372
FAM222B	-0.670936	0.237941	0.00480604	0.309372
FXYD5	-0.273788	0.0974459	0.00495966	0.309372
GIMAP4	1.1873	0.415361	0.00425675	0.309372
GLRX5	0.40519	0.142678	0.00451284	0.309372
HBA2	1.0088	0.358302	0.00487034	0.309372
HBS1L	0.519848	0.181873	0.0042592	0.309372
HKR1	-0.758762	0.264074	0.00406218	0.309372
HMOX1	1.56145	0.547065	0.00431418	0.309372
KDM1B	0.537639	0.18995	0.00464872	0.309372
KHSRP	-0.36152	0.12842	0.00487565	0.309372
LMF2	-0.493929	0.173899	0.00450679	0.309372
43525	0.932894	0.325014	0.00410058	0.309372
MEF2D	-0.458295	0.159838	0.00414064	0.309372
MFF	-0.315554	0.109944	0.00410296	0.309372
MS4A3	1.03048	0.359557	0.00415741	0.309372
NCF2	1.04408	0.372136	0.00502178	0.309372
NEK1	0.898654	0.317449	0.00464231	0.309372
PPIL3	-0.409193	0.143993	0.0044865	0.309372
RHOU	1.02405	0.365058	0.00502889	0.309372
RTN1	1.05243	0.375112	0.00502162	0.309372
S100A11	0.748172	0.265633	0.0048541	0.309372
SH3BP1	0.593405	0.207313	0.00420501	0.309372
SLC15A3	1.11668	0.391093	0.00429976	0.309372
SLC22A15	0.988834	0.348058	0.0044972	0.309372
STX7	0.447214	0.15851	0.00478212	0.309372
TJAP1	-0.503109	0.17907	0.00496088	0.309372
TLR4	1.16517	0.411842	0.00466685	0.309372
UBE2D1	0.688545	0.24524	0.00499063	0.309372
RAB13	-0.724744	0.259127	0.00516012	0.31153
SNX10	0.553458	0.197672	0.00511206	0.31153
TRPT1	-0.519336	0.185622	0.00514502	0.31153
ALG2	0.454149	0.162522	0.00519987	0.311992
HSPH1	0.478331	0.171543	0.00529695	0.315867
ADPRH	-0.771043	0.27807	0.00555692	0.31737
C16orf58	-0.571504	0.206165	0.00557009	0.31737
CYBB	0.87212	0.31439	0.00553702	0.31737
DDIT4	-0.856181	0.309579	0.00568132	0.31737
FOXRED2	-0.569939	0.204656	0.00535494	0.31737
HBB	1.04587	0.37587	0.00539386	0.31737
IGF2R	0.829358	0.299678	0.00564891	0.31737
ITM2C	-0.471672	0.170521	0.00567382	0.31737
KCNA3	-0.847031	0.304601	0.00542264	0.31737
L3MBTL2	-0.582728	0.210626	0.00566358	0.31737
TFRC	0.578423	0.209009	0.00564958	0.31737
STARD3	-0.624606	0.22683	0.00589377	0.327357
SORT1	0.651917	0.237071	0.00596168	0.329248
GLRX	0.543418	0.198159	0.00610041	0.335006
HEG1	0.787002	0.287811	0.0062486	0.33958
NAT10	-0.476019	0.174255	0.00630021	0.33958
SLC17A9	-0.609215	0.222992	0.00629501	0.33958
UBE2Q2	0.382702	0.140157	0.00632346	0.33958
C5AR1	0.980785	0.359798	0.00641207	0.342447
MYD88	0.379161	0.139393	0.00652637	0.346647
ATP6AP2	0.376808	0.140651	0.00738349	0.347088
CIZ1	-0.39687	0.146809	0.00686517	0.347088
CLEC11A	-0.523764	0.195446	0.00736567	0.347088
CLEC7A	1.08365	0.401109	0.00690009	0.347088
DAAM1	0.574596	0.213372	0.00708257	0.347088
DYSF	1.29146	0.478006	0.00689733	0.347088
FAM120A	0.356796	0.133542	0.00754488	0.347088
FAM204A	0.400523	0.148387	0.00695106	0.347088
FBXO5	0.582453	0.216525	0.00714505	0.347088
FHOD1	-0.494481	0.185236	0.00759734	0.347088
ITGA4	0.518015	0.192143	0.00701807	0.347088
LILRB4	1.04019	0.384004	0.00675256	0.347088
LRRC37BP1	-0.513205	0.1896	0.00679396	0.347088
MAN2A1	0.648723	0.241648	0.00726226	0.347088
MAP2K1	0.470349	0.17401	0.00687179	0.347088
MPI	-0.619794	0.232173	0.00759561	0.347088
NPL	1.07067	0.400802	0.00755542	0.347088
PAPD5	0.611703	0.227967	0.00729004	0.347088
PSAP	0.661801	0.247341	0.00745825	0.347088
REC8	-0.51871	0.194455	0.00764165	0.347088
RLTPR	-0.830618	0.309628	0.00730445	0.347088
SAT1	0.613412	0.227922	0.00711701	0.347088
SCIMP	1.18373	0.441267	0.00730571	0.347088
SLC4A1	1.18422	0.443894	0.00763489	0.347088
SNHG1	-0.331866	0.123928	0.0074086	0.347088
TMEM167A	0.396111	0.148063	0.0074666	0.347088
TP73-AS1	-0.817263	0.305305	0.00743126	0.347088
TRMT10A	0.984311	0.36351	0.00677317	0.347088
TSHZ3	1.2128	0.454349	0.00760057	0.347088
VWA8	0.491875	0.18361	0.00738627	0.347088
ZNF350	-0.908807	0.335523	0.00675622	0.347088
DCAF8	-0.486452	0.182482	0.00768145	0.347273
ATP6V1B2	0.477619	0.179378	0.00775315	0.348105
MARCKSL1	-0.470353	0.176702	0.00777148	0.348105
FGD4	1.17674	0.444724	0.00814499	0.355519
HERC2P2	-0.695248	0.262337	0.00804426	0.355519
MINPP1	0.562137	0.212695	0.00821914	0.355519
MT-RNR2	0.465565	0.176103	0.00820041	0.355519
NAAA	0.611874	0.231683	0.00826619	0.355519
NYNRIN	-0.701416	0.264605	0.00803005	0.355519
SP140	1.3354	0.504312	0.0080976	0.355519
TMEM56	1.5408	0.583132	0.00823503	0.355519
YIPF4	0.452918	0.171199	0.00815539	0.355519
ACCS	-0.978396	0.371247	0.00840298	0.35708
NDRG2	-0.877985	0.333196	0.00841269	0.35708
SAR1B	0.467759	0.177464	0.00839403	0.35708
ATN1	-0.606904	0.231569	0.00877159	0.359746
BCL3	0.596136	0.227406	0.00875533	0.359746
IFIT3	0.711932	0.270609	0.00851716	0.359746
PTGES3L	-0.98655	0.375986	0.00869284	0.359746
QPCT	1.00529	0.382725	0.00862233	0.359746
SDCBP	0.496221	0.189332	0.00876968	0.359746
SGMS2	1.11536	0.425284	0.00872581	0.359746
ZFP36L2	-0.254712	0.0969416	0.00860212	0.359746
APOOL	-0.578597	0.224014	0.0097985	0.361357
C1orf112	-0.85002	0.327946	0.00954331	0.361357
CBLL1	0.387487	0.148483	0.00906387	0.361357
CSTA	0.841859	0.326255	0.00986939	0.361357
ECI2	-0.41865	0.160635	0.0091546	0.361357
FAM193A	-0.472127	0.182338	0.00961744	0.361357
FCGR3A	1.30594	0.505693	0.00980922	0.361357
FERMT3	0.383402	0.147362	0.00927459	0.361357
GTF2H2B	-0.915928	0.350902	0.00904859	0.361357
HBD	1.06963	0.411791	0.0093907	0.361357
HOXA5	-0.685132	0.264204	0.0095089	0.361357
IL18R1	-0.854812	0.329583	0.00949716	0.361357
JUN	-0.616117	0.238596	0.00981549	0.361357
MCM7	-0.30633	0.118488	0.00972872	0.361357
MT-TK	0.656157	0.252237	0.00928568	0.361357
OSBPL11	0.701827	0.268635	0.00898655	0.361357
PDE7A	-0.42604	0.163399	0.00912419	0.361357
RAB18	0.383062	0.14636	0.00886378	0.361357
RAP1B	0.233574	0.0904013	0.00977354	0.361357
RBMX	-0.239626	0.0923896	0.00949645	0.361357
RNF125	-0.534584	0.206394	0.00959452	0.361357
RPAIN	-0.371299	0.143309	0.00957275	0.361357
RPS5	-0.33031	0.127181	0.00939948	0.361357
SAMD10	-0.669869	0.259671	0.00988899	0.361357
SNX27	0.495664	0.191099	0.00949344	0.361357
TFDP2	-0.46594	0.178584	0.00907867	0.361357
TRIB1	0.87001	0.335739	0.00956071	0.361357
TRIM26	-0.426095	0.164896	0.00976549	0.361357
USP12	0.646669	0.25009	0.00971688	0.361357
LOC100507634	-1.04516	0.405368	0.00992895	0.361459
MICAL1	-0.498993	0.193702	0.00999247	0.362414
FLJ42627	-0.588026	0.228671	0.0101262	0.363984
KIF1C	0.921401	0.358596	0.0101855	0.363984
SEL1L	0.482224	0.187462	0.0101003	0.363984
SLC35A1	0.549485	0.213801	0.0101675	0.363984
GNAI3	0.303583	0.118294	0.0102775	0.36459
ZNF662	-0.91835	0.357709	0.0102491	0.36459
CCR1	0.963671	0.375874	0.0103529	0.365166
SHANK3	-0.686845	0.267956	0.0103689	0.365166
RBM38	0.780918	0.304944	0.0104414	0.365305
ZFY	0.557684	0.217791	0.010448	0.365305
AGFG1	0.5349	0.209418	0.0106423	0.366332
BPGM	0.637212	0.250078	0.0108327	0.366332
CHST15	1.07917	0.426185	0.011336	0.366332
FAM105A	0.595449	0.234444	0.0110904	0.366332
FAM193B	-0.636898	0.252263	0.0115784	0.366332
FAN1	-0.828186	0.324574	0.0107226	0.366332
FOSB	-0.437999	0.173289	0.0114855	0.366332
HYMAI	-1.3439	0.532721	0.0116457	0.366332
IFI30	0.813967	0.319963	0.0109609	0.366332
IFNGR2	0.408309	0.161588	0.0115089	0.366332
KIAA1598	0.68114	0.267242	0.0108103	0.366332
KLC4	-0.748158	0.293383	0.010769	0.366332
KLHL6	-0.52794	0.208624	0.0113876	0.366332
LINC00338	-0.646298	0.25548	0.0114147	0.366332
LUC7L	-0.588971	0.231727	0.0110328	0.366332
MGLL	-0.599304	0.237557	0.0116431	0.366332
MRPS36	0.440548	0.174568	0.0116145	0.366332
PARP8	0.732807	0.28884	0.0111786	0.366332
PBRM1	0.433937	0.17059	0.0109671	0.366332
RAD50	0.615559	0.242827	0.0112457	0.366332
RPRD2	-0.355312	0.140774	0.0116033	0.366332
SLC9A7	-0.46243	0.181719	0.0109353	0.366332
SPG7	-0.42728	0.167119	0.0105656	0.366332
SUPT6H	-0.366433	0.144409	0.0111661	0.366332
TMEM42	-0.523796	0.207033	0.011406	0.366332
TSC22D3	-0.492547	0.194021	0.0111289	0.366332
TSPYL5	-0.675164	0.267058	0.0114662	0.366332
ULK1	-0.49972	0.195634	0.0106383	0.366332
VPS51	-0.438258	0.172434	0.0110347	0.366332
ZBTB8OS	0.712144	0.280021	0.0109849	0.366332
ZFP3	-0.844108	0.333144	0.0112845	0.366332
CD55	0.57343	0.227694	0.011788	0.366429
CDKN1A	0.79509	0.315819	0.0118174	0.366429
CORO1B	-0.395841	0.157142	0.0117691	0.366429
EIF4E2	0.454558	0.180433	0.0117603	0.366429
MIR22HG	1.03278	0.410693	0.0119127	0.366429
MS4A1	1.33334	0.530123	0.0118983	0.366429
TAF3	0.72135	0.28667	0.011859	0.366429
AKIRIN2	0.412224	0.16401	0.0119572	0.366637
DYM	-0.502108	0.199899	0.0120114	0.36714
GEMIN8	-0.583222	0.232372	0.0120778	0.368012
DTWD2	-0.806491	0.321625	0.0121571	0.368332
IL4R	0.668554	0.266755	0.0122019	0.368332
PDLIM5	0.449757	0.179452	0.0122011	0.368332
C4orf27	0.449105	0.179636	0.0124163	0.369071
DCAF13	0.484512	0.193581	0.0123185	0.369071
POLE	-0.550988	0.220376	0.0124116	0.369071
STMN3	-0.481811	0.192504	0.0123194	0.369071
VAMP3	0.389089	0.155514	0.0123506	0.369071
EIF4EBP2	0.214037	0.0856675	0.0124734	0.36964
TMC8	-0.435954	0.174593	0.0125257	0.37006
ABLIM1	-0.565962	0.227352	0.012797	0.370899
ASGR1	0.915568	0.367271	0.0126707	0.370899
GYPA	1.55326	0.623808	0.0127756	0.370899
H2AFY	-0.22773	0.0913293	0.0126487	0.370899
IMMT	0.279688	0.112118	0.01261	0.370899
IPCEF1	1.34461	0.539924	0.0127613	0.370899
SNX4	0.421185	0.169239	0.0128212	0.370899
DPYD	0.491283	0.197937	0.0130642	0.376544
FCER2	1.36961	0.551992	0.0130938	0.376544
ARL6IP5	0.250276	0.100982	0.013196	0.378365
CNIH4	0.62662	0.253689	0.01351	0.382434
HBM	1.19074	0.482034	0.0135025	0.382434
MFI2-AS1	-0.896208	0.362836	0.0135111	0.382434
OAF	0.523712	0.212032	0.0135124	0.382434
PTEN	0.309586	0.12537	0.0135347	0.382434
C1QTNF3	-0.771021	0.312519	0.0136207	0.383749
AKR1A1	-0.33855	0.138583	0.0145679	0.38378
ALAS2	1.17646	0.47804	0.013855	0.38378
AP1S2	0.491611	0.200082	0.0140085	0.38378
BCL2A1	0.706847	0.288029	0.0141244	0.38378
CDK9	-0.65916	0.267702	0.0138054	0.38378
CHKA	-0.555861	0.227452	0.0145312	0.38378
CPEB2	0.703329	0.28708	0.014288	0.38378
DMXL2	0.814636	0.330879	0.013815	0.38378
FTSJ1	-0.390286	0.159094	0.0141603	0.38378
HLA-DRB5	-1.6081	0.656814	0.0143521	0.38378
HVCN1	0.716763	0.292123	0.014142	0.38378
IFI44L	0.874361	0.356789	0.0142603	0.38378
JHDM1D	1.0028	0.409503	0.0143321	0.38378
KCTD13	-0.624756	0.255911	0.0146344	0.38378
MRPL10	-0.404021	0.163983	0.0137471	0.38378
MRPL16	-0.362607	0.148018	0.0142955	0.38378
MT1X	0.615555	0.251348	0.0143248	0.38378
OAS1	0.652972	0.267003	0.0144626	0.38378
PI4KA	-0.495502	0.202995	0.0146484	0.38378
PITPNA	0.377875	0.154488	0.0144454	0.38378
PTP4A2	0.307599	0.126012	0.014645	0.38378
SNRNP70	-0.344397	0.140136	0.0139873	0.38378
TCL1A	1.02115	0.414343	0.0137208	0.38378
VPS52	-0.443783	0.181417	0.014437	0.38378
XRCC1	-0.561479	0.229875	0.0145841	0.38378
ZNF346	-0.728643	0.296694	0.0140544	0.38378
ALG8	-0.339428	0.139718	0.0151246	0.384123
ASB1	0.95531	0.394876	0.015552	0.384123
B3GNTL1	-0.678717	0.281305	0.0158328	0.384123
BIN1	-0.444471	0.183247	0.0152862	0.384123
CASK	-0.827919	0.343665	0.0159924	0.384123
CCDC106	-0.712846	0.295159	0.0157297	0.384123
DHX9	-0.226642	0.093663	0.0155309	0.384123
EPB49	1.01363	0.418121	0.0153396	0.384123
ERP44	0.335881	0.138068	0.0149859	0.384123
H1FX	-0.366171	0.15208	0.0160509	0.384123
HSD17B8	-0.656695	0.272541	0.0159732	0.384123
KCTD12	0.777261	0.320524	0.0153095	0.384123
KIF14	0.850612	0.351508	0.015525	0.384123
LBR	0.255097	0.10484	0.0149659	0.384123
LILRA5	1.13045	0.466382	0.0153558	0.384123
LSM7	-0.27673	0.114842	0.0159676	0.384123
LY96	0.803253	0.330015	0.0149335	0.384123
MAFB	1.04127	0.429375	0.0153049	0.384123
MAPK8IP3	-0.6566	0.271271	0.0155009	0.384123
MEFV	1.0761	0.441961	0.0148987	0.384123
MNDA	0.921243	0.379575	0.0152226	0.384123
NFX1	-0.376834	0.156438	0.0160035	0.384123
NLGN2	-0.874412	0.358956	0.0148511	0.384123
PLAGL1	-0.42342	0.175695	0.0159541	0.384123
PLXDC2	0.865603	0.35594	0.0150208	0.384123
RASSF4	0.997362	0.409685	0.0149139	0.384123
RPL22L1	-0.324059	0.133433	0.0151564	0.384123
SEC24D	0.411173	0.170672	0.0159899	0.384123
43714	-0.328506	0.136477	0.0160826	0.384123
SHQ1	-0.475151	0.194876	0.0147597	0.384123
STX11	0.741436	0.307311	0.0158367	0.384123
TESC	0.735388	0.304715	0.0158063	0.384123
TYMP	0.74201	0.307496	0.0158186	0.384123
UNC119B	-0.490772	0.203195	0.0157235	0.384123
WDR6	-0.526277	0.21672	0.0151667	0.384123
ZSCAN30	-0.732987	0.304523	0.0160842	0.384123
CHD8	-0.432911	0.179979	0.0161571	0.384357
REPIN1	-0.337253	0.140231	0.016173	0.384357
ABHD5	0.694064	0.288913	0.0162912	0.384573
C17orf76-AS1	-0.30787	0.128193	0.0163233	0.384573
RCBTB2	0.711424	0.296276	0.0163404	0.384573
ZKSCAN3	-0.759644	0.316304	0.0163223	0.384573
TMEM159	-0.464878	0.19401	0.0165682	0.388819
YWHAB	0.226597	0.0945957	0.0166008	0.388819
GLT1D1	1.11302	0.464951	0.0166728	0.389567
CPT1A	-0.368652	0.154068	0.0167206	0.389746
COQ7	-0.713867	0.298758	0.0168738	0.39059
DENND5A	-0.333368	0.139699	0.0170173	0.39059
GABPA	0.499329	0.208924	0.0168481	0.39059
LOC100130691	-0.905914	0.379308	0.0169249	0.39059
SNHG9	-0.565294	0.236859	0.0170038	0.39059
TIFA	-0.467092	0.195772	0.0170377	0.39059
USP25	0.423613	0.177549	0.0170381	0.39059
PSMD1	0.35087	0.14712	0.0170825	0.390687
TTPAL	-0.474443	0.199223	0.017244	0.392534
ZNF337	-0.648012	0.27202	0.0172084	0.392534
SLC39A13	-0.701661	0.295236	0.0174726	0.396807
OSBPL8	0.391643	0.164891	0.0175412	0.397437
NID1	0.987565	0.416259	0.0176693	0.399408
CLASRP	-0.516521	0.217809	0.0177191	0.399604
DIABLO	-0.357659	0.151003	0.0178578	0.401184
KAT2A	-0.519928	0.21954	0.0178717	0.401184
SIPA1L3	-0.653127	0.275993	0.0179589	0.402213
SERPINB9	0.356518	0.15091	0.0181548	0.405667
ASCC3	0.483748	0.204914	0.0182389	0.405679
IRAK1	-0.493479	0.209009	0.0182237	0.405679
USP9Y	-0.637137	0.269996	0.0182848	0.405773
B3GNT2	-0.40223	0.170612	0.0183947	0.405969
CASP1	0.625269	0.265272	0.0184189	0.405969
GALT	-0.456343	0.193511	0.0183627	0.405969
CIRBP	-0.27017	0.114678	0.0184784	0.406359
C4orf21	-0.769972	0.327168	0.0186004	0.408118
BRD9	-0.619983	0.263895	0.018806	0.410774
CARD16	0.82899	0.35275	0.0187696	0.410774
ANKS6	-0.783512	0.334827	0.0192812	0.413055
FTO	-0.381026	0.162813	0.0192702	0.413055
MT-ATP8	0.367552	0.157013	0.019237	0.413055
NCOA1	0.334328	0.142552	0.0190112	0.413055
RAB11B	-0.263862	0.11277	0.0192929	0.413055
SERPINB2	0.852406	0.364202	0.0192594	0.413055
SKAP2	0.336267	0.143462	0.0190814	0.413055
XAF1	0.681392	0.291067	0.0192314	0.413055
ZNF469	-0.872905	0.372855	0.0192251	0.413055
C16orf80	-0.378034	0.161796	0.019466	0.414494
DOM3Z	-0.505293	0.216351	0.0195158	0.414494
NOD2	0.834107	0.357182	0.0195307	0.414494
SLC36A4	0.659119	0.282191	0.0195056	0.414494
CD24	1.14868	0.49222	0.0196135	0.415344
GMPR2	-0.369812	0.158593	0.01971	0.415759
KIAA0922	0.563289	0.241673	0.0197642	0.415759
SLX4	-0.859424	0.368714	0.0197603	0.415759
SMURF1	-0.751993	0.322739	0.0198042	0.415759
BCAT2	-0.512007	0.220123	0.020018	0.419342
PEX7	-0.790977	0.340251	0.0200889	0.419923
PLEKHF2	0.451682	0.194383	0.0201431	0.420153
LSS	-0.595401	0.256355	0.0202027	0.420494
HSP90B1	0.303678	0.130826	0.0202737	0.42107
PRDX6	-0.246238	0.106143	0.0203485	0.421722
ANKRD39	-0.565519	0.245048	0.021011	0.422675
BTBD3	-0.637138	0.275226	0.0206149	0.422675
CD300E	1.11869	0.48531	0.0211612	0.422675
ESYT1	-0.287946	0.124259	0.0204874	0.422675
FAM219B	-0.521023	0.225204	0.0206919	0.422675
LDOC1L	-0.560735	0.243265	0.0211644	0.422675
MBIP	-0.403469	0.174794	0.0209851	0.422675
MTSS1	0.87173	0.376818	0.0207009	0.422675
MYO5A	0.493659	0.213639	0.0208488	0.422675
NCOA4	0.265795	0.114985	0.0208014	0.422675
PELP1	-0.451	0.195221	0.0208767	0.422675
RBM10	-0.487666	0.211161	0.0209185	0.422675
RHOA	0.171283	0.0743331	0.0212078	0.422675
SELENBP1	1.19725	0.519052	0.0210771	0.422675
SKA1	0.713425	0.308476	0.0207367	0.422675
SPTLC1	0.283958	0.12278	0.020737	0.422675
UCHL1	-0.586325	0.254478	0.0212207	0.422675
ZMPSTE24	0.441167	0.190433	0.020523	0.422675
ZNF317	-0.325893	0.141127	0.0209315	0.422675
ACAP1	-0.444991	0.193625	0.0215495	0.424053
CNTROB	-0.495666	0.215631	0.021523	0.424053
KIAA0226L	0.879214	0.382363	0.021481	0.424053
KIF18A	0.72183	0.313993	0.0215121	0.424053
LRRC8C	0.372694	0.162169	0.0215517	0.424053
PTBP2	-0.7038	0.306091	0.0214869	0.424053
HSPA8	0.184382	0.0802711	0.0216192	0.424523
FLT3	-0.502969	0.219201	0.0217586	0.426314
MAGED2	-0.443509	0.193346	0.0217981	0.426314
EXOC3	-0.498794	0.217608	0.0218958	0.426342
GLTSCR2	-0.34406	0.150379	0.0221403	0.426342
HAUS5	-0.537522	0.234679	0.0219949	0.426342
LATS1	-0.419345	0.183418	0.022238	0.426342
LTBP4	-0.510435	0.222909	0.0220285	0.426342
NAV1	-0.572449	0.250385	0.0222382	0.426342
RPL7L1	0.723864	0.316408	0.0221517	0.426342
TBC1D22A	-0.537777	0.234993	0.0221097	0.426342
TLR8	1.07	0.466922	0.021929	0.426342
ZNF621	-0.624382	0.273026	0.0222018	0.426342
MOB3A	0.394769	0.17278	0.022324	0.426545
MT-TV	0.698321	0.305665	0.0223366	0.426545
BCL2L11	0.745354	0.327663	0.0229205	0.426817
CES1	1.06126	0.466264	0.0228401	0.426817
KPTN	-0.554719	0.24371	0.0228373	0.426817
LHPP	0.60013	0.263824	0.0229217	0.426817
LOC100129250	-0.470468	0.206735	0.0228634	0.426817
LTBP3	-0.565965	0.248498	0.022754	0.426817
MECP2	-0.323217	0.141927	0.022766	0.426817
MKRN1	0.283604	0.124401	0.0226225	0.426817
NSMAF	-0.401983	0.176229	0.0225473	0.426817
PTPN6	0.349456	0.153516	0.0228251	0.426817
S100A9	0.86677	0.380614	0.0227687	0.426817
TM7SF2	-0.616436	0.270812	0.022831	0.426817
TMEM156	0.825181	0.361895	0.0225977	0.426817
CHIC2	-0.5172	0.228245	0.0234524	0.427351
DENND1C	-0.446686	0.196763	0.0231969	0.427351
FAM73B	-0.382248	0.168711	0.0234696	0.427351
KIAA1551	0.633666	0.279694	0.023478	0.427351
LOC254128	-0.565068	0.248737	0.0231014	0.427351
MS4A6A	0.813218	0.358478	0.0232971	0.427351
NLRP2	0.933528	0.411706	0.0233619	0.427351
ORMDL2	0.526975	0.23246	0.0233936	0.427351
SERPINF1	0.725865	0.319398	0.0230502	0.427351
SLC7A1	-0.310797	0.136757	0.0230495	0.427351
WDR67	-0.645101	0.284057	0.0231455	0.427351
ZER1	-0.454272	0.200165	0.0232388	0.427351
ARID4A	0.538398	0.238184	0.0237943	0.432301
CXCR4	-0.35157	0.155921	0.0241463	0.434634
PAK1IP1	0.597596	0.264969	0.0241121	0.434634
TCTA	-0.43206	0.191563	0.024105	0.434634
TRIP12	0.371244	0.164589	0.0240968	0.434634
ZFPL1	-0.538462	0.238538	0.0239868	0.434634
ATP6V0A2	-0.397304	0.177013	0.0248008	0.435949
CA2	1.11612	0.497819	0.0249597	0.435949
CD68	0.656412	0.292763	0.0249532	0.435949
CPM	1.06861	0.475929	0.0247485	0.435949
CROCC	-0.871057	0.38795	0.0247503	0.435949
FOCAD	-0.621495	0.276548	0.024619	0.435949
FUS	-0.266152	0.118658	0.0248955	0.435949
IRF2BP2	-0.269771	0.12019	0.0247974	0.435949
MARCKS	0.724045	0.322636	0.0248226	0.435949
MDC1	-0.45591	0.203316	0.0249373	0.435949
PAG1	0.539803	0.240645	0.0248873	0.435949
RAB10	0.288228	0.128179	0.0245355	0.435949
S100A8	0.827805	0.369278	0.0249819	0.435949
SPPL3	-0.368613	0.164039	0.0246335	0.435949
TIAM1	0.781411	0.348206	0.0248256	0.435949
TWF1	0.556093	0.248015	0.0249503	0.435949
ZC2HC1A	-0.823733	0.366542	0.0246204	0.435949
ANO6	0.388481	0.173588	0.0252246	0.436762
BLOC1S1	0.32098	0.14357	0.025371	0.436762
CD86	0.810009	0.361664	0.0251123	0.436762
FBXL17	0.544059	0.243213	0.0252888	0.436762
FYB	0.770994	0.344977	0.0254231	0.436762
KBTBD11	0.572368	0.255601	0.0251361	0.436762
MTHFD1L	-0.619611	0.27726	0.0254329	0.436762
PSMA4	0.228639	0.102268	0.0253729	0.436762
TUT1	-0.694649	0.31057	0.0253068	0.436762
ACADVL	-0.353061	0.158374	0.0257947	0.438154
CYTIP	0.5257	0.236059	0.0259482	0.438154
EMD	-0.397233	0.178284	0.0258748	0.438154
KBTBD3	0.686207	0.308167	0.0259647	0.438154
KIAA0125	-0.417673	0.18757	0.0259637	0.438154
NARS	0.297812	0.133644	0.0258542	0.438154
PCYT1A	0.822033	0.368771	0.0258061	0.438154
RGS1	-0.940913	0.422382	0.0259047	0.438154
TSPAN33	-0.533842	0.239218	0.0256407	0.438154
ZNF263	-0.526636	0.236121	0.0257235	0.438154
SCARB1	-0.517336	0.232477	0.02606	0.439
RASSF3	0.489375	0.220024	0.0261359	0.439517
ARL5A	0.343441	0.154702	0.0264175	0.441199
ARL6IP4	-0.261568	0.117765	0.0263444	0.441199
BMPR2	0.583001	0.262503	0.0263558	0.441199
LPCAT4	-0.477688	0.215135	0.0263905	0.441199
AGAP2	-0.586014	0.264322	0.0266201	0.442406
DPH5	-0.333933	0.150548	0.0265473	0.442406
SLC31A2	0.79841	0.36018	0.0266439	0.442406
ZBTB7B	0.667749	0.301292	0.0266718	0.442406
ALG12	-0.521459	0.235513	0.0268192	0.444093
LRRC42	-0.728273	0.329086	0.0268962	0.444611
ELMO1	-0.373391	0.16891	0.0270642	0.44509
ERI3	-0.363864	0.16484	0.0272872	0.44509
HLA-DOB	1.03842	0.470299	0.0272447	0.44509
LYAR	0.402409	0.182226	0.0272236	0.44509
MAP4K2	-0.466617	0.211298	0.0272211	0.44509
NCKIPSD	-0.668393	0.302807	0.0272916	0.44509
PCNP	-0.267745	0.121099	0.027038	0.44509
ZNF135	-0.898094	0.406816	0.0272709	0.44509
CMTM4	-0.653987	0.296419	0.0273636	0.445518
BIRC3	0.661273	0.300149	0.0275843	0.446866
C19orf70	-0.412917	0.187358	0.027532	0.446866
RAB31	0.65118	0.295533	0.0275657	0.446866
ABCF1	0.354436	0.16096	0.0276642	0.447414
EIF3G	-0.297347	0.135274	0.0279413	0.450397
GPR137B	-0.587899	0.26742	0.02792	0.450397
SPG21	0.289285	0.131665	0.0280115	0.450782
ANKRD46	-0.535102	0.244396	0.0285616	0.451069
BCL11B	1.03888	0.47469	0.0286304	0.451069
IRF2	0.373216	0.170527	0.0286255	0.451069
KLF5	0.722864	0.330079	0.0285261	0.451069
MAP3K3	0.466848	0.213259	0.0285887	0.451069
MON1B	0.943203	0.430747	0.0285465	0.451069
MRPS35	0.292722	0.133545	0.028384	0.451069
NIPA2	0.232348	0.106047	0.0284531	0.451069
NT5DC1	-0.407279	0.186099	0.0286327	0.451069
PHC1	-0.486252	0.222004	0.0285041	0.451069
PSD4	-0.430241	0.196122	0.0282542	0.451069
RAB7A	0.175473	0.0800832	0.0284422	0.451069
SNAPIN	-0.340567	0.155546	0.0285607	0.451069
C14orf119	0.277247	0.12672	0.0286794	0.451074
CLDN15	-0.545806	0.249933	0.0289763	0.455008
LAIR1	-0.339281	0.155433	0.0290494	0.455419
UNC13D	-0.344578	0.157912	0.0291033	0.455529
SGSM2	-0.473366	0.217064	0.0292005	0.456317
MFSD5	0.424701	0.194843	0.0292793	0.456653
PECAM1	0.360301	0.165383	0.029363	0.456653
ROCK2	0.577059	0.264832	0.0293346	0.456653
CCT6P3	-0.835807	0.384026	0.0295227	0.458403
PLAGL2	-0.430601	0.197948	0.0296059	0.458962
SETD7	0.447801	0.205992	0.0297146	0.459914
TBC1D20	0.36623	0.168615	0.0298561	0.461369
RELL1	0.515625	0.237541	0.0299552	0.462166
CPEB4	0.636659	0.29349	0.0300622	0.462525
ERMP1	-0.501805	0.23134	0.0300737	0.462525
GPR155	0.746335	0.344487	0.0302724	0.463665
KLRC3	-1.31725	0.607893	0.0302421	0.463665
TARBP1	-0.429396	0.19822	0.0302909	0.463665
FRS2	0.519085	0.239698	0.0303436	0.463742
GBP1	0.678843	0.313624	0.0304251	0.464257
COX6C	-0.186244	0.0862529	0.0308285	0.464722
DNLZ	0.866406	0.401324	0.0308603	0.464722
GPCPD1	0.415825	0.19254	0.0307973	0.464722
HNMT	0.673425	0.311963	0.0308758	0.464722
IDH1	0.387667	0.179597	0.0308859	0.464722
KIF5B	0.358375	0.165661	0.0305175	0.464722
POR	0.617309	0.285869	0.0308183	0.464722
SRGN	0.315079	0.145737	0.030621	0.464722
TIE1	-0.610376	0.282267	0.0305868	0.464722
DENND1A	0.555063	0.257249	0.0309522	0.465
CHST12	-0.369802	0.171623	0.0311828	0.467141
UFD1L	0.378086	0.175476	0.0311908	0.467141
ARHGAP18	0.75695	0.351704	0.0313784	0.468165
SERAC1	0.696405	0.323512	0.0313469	0.468165
TRIP6	-0.579774	0.269422	0.0314037	0.468165
RPS15	-0.207464	0.0964579	0.0314897	0.468729
TRIM58	0.522847	0.243343	0.0316662	0.470635
ANGEL2	-0.443433	0.206446	0.0317186	0.470694
BIVM	-0.488874	0.22782	0.031883	0.470977
HLA-F	0.491162	0.228773	0.0317976	0.470977
ST6GAL1	-0.299098	0.139362	0.0318569	0.470977
TNRC18	-0.438836	0.204673	0.0320264	0.472377
ADAP2	1.00796	0.470471	0.0321568	0.473456
ATP6V1D	0.38785	0.181073	0.032197	0.473456
QKI	0.316616	0.147995	0.0324056	0.475804
MTA2	-0.328262	0.153527	0.032506	0.476558
FOXK1	-0.490839	0.229682	0.0325949	0.477142
NFATC2	-0.336495	0.157657	0.0328135	0.47962
C14orf93	-0.539981	0.253326	0.0330426	0.480988
CD79B	0.735701	0.345225	0.0330825	0.480988
FCN1	0.810613	0.380426	0.033105	0.480988
ISCA1	-0.384707	0.180502	0.0330627	0.480988
CPPED1	0.411936	0.193751	0.0334941	0.483263
MED12	-0.433285	0.203811	0.0335102	0.483263
MNF1	-0.369619	0.173806	0.0334512	0.483263
STK17A	0.54156	0.254732	0.0335032	0.483263
STOML2	-0.326671	0.153489	0.0333122	0.483263
LIMK2	-0.772851	0.363875	0.0336749	0.484202
SNX2	0.35439	0.166848	0.0336676	0.484202
STAT1	0.313447	0.147681	0.0337986	0.485262
PAXBP1	-0.452655	0.213518	0.034007	0.487534
ASAH1	0.459812	0.217587	0.0345804	0.48754
CASP2	-0.320345	0.151453	0.0344172	0.48754
CEP95	-0.521923	0.246931	0.0345461	0.48754
CHUK	0.407705	0.192513	0.0341913	0.48754
COQ6	-0.522115	0.24702	0.0345449	0.48754
DDAH2	-0.681143	0.321407	0.0340688	0.48754
MYO19	-0.578031	0.273139	0.0343236	0.48754
PTPRC	0.401746	0.189948	0.0344276	0.48754
RAD21-AS1	1.24821	0.590859	0.0346411	0.48754
RMND1	-0.554763	0.262273	0.0344116	0.48754
SLC25A29	-0.605741	0.286766	0.0346595	0.48754
SS18L1	-0.537003	0.253658	0.0342571	0.48754
USP8	0.52094	0.246492	0.034565	0.48754
NUP37	0.377262	0.178732	0.0347921	0.488698
F13A1	0.947822	0.450132	0.0352344	0.489728
FLJ20021	-0.693189	0.329536	0.0354196	0.489728
GIMAP8	0.868853	0.412936	0.0353709	0.489728
GNB2L1	-0.221535	0.105079	0.0350075	0.489728
LRBA	-0.359645	0.170581	0.0350007	0.489728
PRPF8	-0.244072	0.115867	0.0351623	0.489728
TCEA1	0.198531	0.0943357	0.0353335	0.489728
TFDP1	-0.219607	0.104327	0.0352937	0.489728
TLR2	0.764747	0.362978	0.0351287	0.489728
UNKL	-0.57277	0.272023	0.0352398	0.489728
ZNF160	-0.871979	0.414225	0.0352839	0.489728
EMB	0.374692	0.178194	0.0354905	0.490011
FAM172A	-0.493858	0.235152	0.0357147	0.491709
UTP11L	0.281552	0.134054	0.0357034	0.491709
ADAM28	-0.45988	0.220135	0.0367002	0.491845
ADCK4	-0.585861	0.280185	0.03653	0.491845
APC	0.628913	0.301814	0.0371805	0.491845
ARHGAP31	0.49334	0.23539	0.0360962	0.491845
BTN3A2	0.571322	0.272748	0.0361987	0.491845
C6orf120	0.392565	0.187475	0.0362635	0.491845
C7orf31	-0.587119	0.281632	0.0370965	0.491845
EIF4G2	0.177413	0.084971	0.0368052	0.491845
FAM41C	-0.692832	0.332161	0.036994	0.491845
GET4	-0.593914	0.283308	0.036051	0.491845
HGS	-0.447058	0.21467	0.0372932	0.491845
MAPKBP1	-0.675935	0.323187	0.0364864	0.491845
MBOAT7	-0.386933	0.185771	0.0372651	0.491845
MIB1	0.434402	0.206942	0.035804	0.491845
MMADHC	-0.237356	0.113147	0.0359262	0.491845
NHP2	-0.305704	0.146504	0.0369194	0.491845
NPDC1	-0.555382	0.266493	0.0371569	0.491845
POLR2G	-0.251751	0.120201	0.0362224	0.491845
PPT1	0.290211	0.138374	0.0359669	0.491845
PRRC2A	-0.357434	0.171251	0.0368703	0.491845
RNF144B	0.479539	0.229044	0.0362911	0.491845
RP2	0.361534	0.172388	0.0359747	0.491845
S100A12	0.783165	0.375932	0.0372275	0.491845
SGK1	0.730702	0.350715	0.0372088	0.491845
SLAMF7	0.830749	0.39753	0.036638	0.491845
SLC25A13	-0.450859	0.216275	0.0371008	0.491845
TBC1D10B	0.336645	0.161575	0.037203	0.491845
TSEN15	-0.333295	0.159199	0.0362981	0.491845
TTLL5	-0.565946	0.271013	0.0367744	0.491845
UHRF1BP1	0.568379	0.271772	0.036494	0.491845
USP28	0.511742	0.245161	0.0368548	0.491845
C12orf52	-0.459224	0.220673	0.0374324	0.492526
NAT6	-0.681825	0.327745	0.0374931	0.492526
ZNF174	-0.685103	0.329327	0.0374969	0.492526
GNA15	-0.527308	0.253645	0.0376246	0.492918
NUMB	0.315094	0.151569	0.0376281	0.492918
ANKRD9	0.639638	0.308134	0.0379088	0.493139
GTPBP3	-0.50966	0.245369	0.0377907	0.493139
LOC100505761	-0.543417	0.261705	0.0378524	0.493139
MPEG1	0.717535	0.345824	0.0380001	0.493139
RRN3	-0.388018	0.186993	0.0379829	0.493139
VCAN	0.858093	0.413124	0.0377938	0.493139
ZBTB39	-0.549827	0.264943	0.0379616	0.493139
FAM69B	-0.545583	0.263118	0.0381229	0.494072
EHBP1L1	0.593886	0.286731	0.0383371	0.495231
FBXO34	0.371803	0.179542	0.0383731	0.495231
MECR	-0.538779	0.26028	0.0384521	0.495231
PHTF2	0.581859	0.280905	0.0383237	0.495231
SERPINB6	-0.262919	0.127054	0.0385135	0.495231
TLR1	0.555974	0.268677	0.0385179	0.495231
TYROBP	0.576333	0.278778	0.0387009	0.496926
FRS3	-0.740947	0.358818	0.0389262	0.497863
PARP6	-0.495586	0.239969	0.0389032	0.497863
PIKFYVE	0.604038	0.292519	0.0389275	0.497863
CHMP1B	-0.215107	0.104257	0.039091	0.498178
EPHB4	-0.538077	0.261018	0.0392597	0.498178
FAM189B	-0.573767	0.278258	0.0392077	0.498178
PHF19	-0.329113	0.159568	0.0391578	0.498178
PTP4A3	-0.669551	0.324714	0.0392106	0.498178
ZCCHC6	0.620626	0.30095	0.0391864	0.498178
PDHA1	-0.281428	0.13659	0.0393616	0.498581
UFM1	0.349981	0.16989	0.0393941	0.498581
ALKBH3	-0.428401	0.209037	0.0404231	0.499125
ANP32B	-0.206637	0.100911	0.0405892	0.499125
B2M	0.224924	0.109386	0.0397584	0.499125
BLVRB	0.571304	0.277552	0.0395549	0.499125
C21orf91	-0.425605	0.207842	0.0405863	0.499125
CAPZA1	0.226493	0.110566	0.0405124	0.499125
CD300LF	0.445776	0.217445	0.0403588	0.499125
CDK7	-0.474239	0.230891	0.0399802	0.499125
DAZAP1	-0.267331	0.130331	0.0402494	0.499125
EHD4	0.534117	0.259845	0.0398284	0.499125
FAM175B	-0.38414	0.186816	0.0397587	0.499125
GCN1L1	-0.414943	0.202667	0.0406181	0.499125
IDS	-0.330138	0.161115	0.0404536	0.499125
JMJD8	-0.356795	0.17413	0.0404614	0.499125
KLF3	0.409462	0.199778	0.0404054	0.499125
LACTB	0.648252	0.315531	0.0399296	0.499125
LRRK2	0.846499	0.413016	0.0404081	0.499125
MOCS2	-0.535663	0.261487	0.0405084	0.499125
MTMR3	0.43448	0.211804	0.0402351	0.499125
RBM4	-0.479439	0.233189	0.0397815	0.499125
TRAF3IP2	-0.44584	0.217073	0.039988	0.499125
WDR37	-0.521118	0.254012	0.0402137	0.499125
ZNF674-AS1	-0.692344	0.33677	0.0397983	0.499125
POU2F2	0.438653	0.214323	0.0406886	0.499359
C11orf30	-0.515077	0.252032	0.0409836	0.502346
ATF6	0.251213	0.123214	0.0414667	0.502963
BLVRA	0.426407	0.209445	0.0417616	0.502963
C9orf72	0.48472	0.238264	0.0419135	0.502963
CCDC57	-0.703135	0.345091	0.0415963	0.502963
EFR3A	0.452462	0.22182	0.0413729	0.502963
ELP6	-0.463975	0.227735	0.0416159	0.502963
FPR1	0.853557	0.419526	0.041894	0.502963
GOLPH3L	-0.41449	0.203688	0.0418587	0.502963
MT-CO3	0.3848	0.188559	0.041277	0.502963
NFATC2IP	0.371112	0.181852	0.0412774	0.502963
PRKAB2	-0.540288	0.265427	0.0417965	0.502963
SIRPA	0.466384	0.229233	0.0418967	0.502963
SRM	-0.304315	0.14943	0.0417002	0.502963
SSR1	0.207969	0.102161	0.0417807	0.502963
UBL3	0.347893	0.170553	0.0413711	0.502963
WDR43	0.373497	0.183483	0.0417904	0.502963
ZNF37BP	-0.829756	0.407081	0.0415193	0.502963
TMCO6	-0.505691	0.248699	0.0420176	0.50359
DOK2	0.795873	0.39167	0.0421536	0.504598
PYGL	0.413995	0.203879	0.0422957	0.505676
ACTR2	0.220096	0.10896	0.0433873	0.507108
C9orf91	-0.435357	0.215069	0.0429427	0.507108
CALCOCO1	-0.312567	0.154554	0.0431377	0.507108
CCDC58	0.505963	0.250474	0.0433811	0.507108
DHX40	-0.319679	0.157966	0.042999	0.507108
INPP5E	-0.484566	0.239388	0.0429505	0.507108
LYRM5	-0.379268	0.187715	0.0433374	0.507108
MS4A7	0.680385	0.335892	0.0428051	0.507108
NEDD1	0.501247	0.247663	0.0429797	0.507108
NIPBL	0.409742	0.202865	0.0434067	0.507108
PPA1	-0.268925	0.133131	0.0433839	0.507108
RABGEF1	0.748868	0.369692	0.0428001	0.507108
RBM43	0.789298	0.389953	0.0429615	0.507108
RGS2	0.546128	0.270148	0.0432186	0.507108
SMCHD1	0.398468	0.197184	0.0433006	0.507108
SPPL2B	-0.518995	0.256231	0.0428167	0.507108
SPRY2	-0.545596	0.269066	0.0425868	0.507108
SRSF9	-0.301725	0.14882	0.042617	0.507108
USP22	-0.266493	0.131735	0.0430785	0.507108
FHL1	-0.408646	0.202532	0.0436235	0.508939
WDPCP	-0.671144	0.332701	0.0436682	0.508939
MED15	-0.363908	0.180469	0.0437516	0.509301
CD14	0.812703	0.40317	0.0438224	0.509514
DCAF16	-0.395308	0.196243	0.0439699	0.510618
LOC440300	0.926871	0.46055	0.0441641	0.511978
MPV17	-0.237751	0.118151	0.0441923	0.511978
CD8B	0.963992	0.479765	0.0445052	0.513558
CXCL12	1.20141	0.598479	0.0447026	0.513558
ETF1	0.235775	0.117288	0.0444081	0.513558
MNT	-0.408762	0.203495	0.0445687	0.513558
MSL3	0.3791	0.188823	0.0446751	0.513558
PCNXL4	-0.460126	0.22913	0.0446282	0.513558
SPTBN1	-0.32781	0.163121	0.0444727	0.513558
TMEM246	-0.653608	0.325667	0.0447514	0.513558
IL6ST	0.450658	0.224666	0.0448669	0.514276
GCC2	0.580705	0.289793	0.0450844	0.516161
SMIM15	0.331002	0.165362	0.0453191	0.518238
CUL7	-0.46906	0.234464	0.04544	0.51901
RPS6KA1	0.3469	0.173492	0.045552	0.519678
AQP9	1.07165	0.536754	0.0458749	0.519869
GPR107	-0.471304	0.236076	0.0458897	0.519869
PIGK	0.318524	0.159506	0.0458317	0.519869
TMEM144	-0.501961	0.251165	0.0456591	0.519869
TOP2A	0.396797	0.198752	0.0458859	0.519869
USP3	0.491449	0.245974	0.0457201	0.519869
SMARCD2	-0.525679	0.263449	0.0460018	0.520532
LOC550112	-0.726059	0.364056	0.0461125	0.520574
PGPEP1	-0.357288	0.179145	0.0461073	0.520574
EIF3J	0.279675	0.140352	0.0462973	0.521448
HCK	0.596556	0.299361	0.0462871	0.521448
AP1G2	-0.269047	0.13519	0.0465753	0.522159
CSNK1E	-0.359541	0.180604	0.0465065	0.522159
PAIP1	-0.35068	0.176147	0.0464985	0.522159
SEC22C	-0.351198	0.176469	0.0465752	0.522159
CRISPLD1	-0.563629	0.283486	0.0467884	0.523341
ISYNA1	-0.551268	0.277266	0.0467866	0.523341
ABHD16A	-0.258159	0.129887	0.0468598	0.523352
KDM3A	-0.420808	0.211808	0.046951	0.523352
SCAF1	-0.356812	0.179581	0.0469321	0.523352
ITGAM	0.644001	0.324427	0.0471403	0.524811
JPX	-0.716457	0.361098	0.0472438	0.524811
SLC9B2	-0.461258	0.232451	0.04722	0.524811
ARHGAP22	-0.650292	0.328009	0.0474188	0.525527
CEBPB	0.495032	0.249754	0.0474704	0.525527
WDR89	0.535084	0.269891	0.0474132	0.525527
ATP2A3	-0.344824	0.174077	0.0476061	0.525643
C10orf76	-0.535911	0.270721	0.0477513	0.525643
C16orf72	0.307027	0.155056	0.0476913	0.525643
SREK1IP1	0.346692	0.1751	0.0477073	0.525643
STT3B	0.529347	0.267291	0.0476571	0.525643
HSBP1	0.193834	0.0979494	0.0478252	0.525861
FAM122C	-0.606297	0.306667	0.0480359	0.526088
MAPK6	0.383003	0.193635	0.0479333	0.526088
PTBP1	-0.237981	0.120386	0.0480623	0.526088
SMG7	-0.300495	0.151993	0.0480389	0.526088
LAMC1	-0.688144	0.348195	0.0481187	0.526112
ARF6	0.162306	0.0824852	0.0491027	0.526653
C20orf111	-0.323537	0.16439	0.0490558	0.526653
CCL4	0.848239	0.430685	0.0488947	0.526653
CD4	0.418229	0.212781	0.0493517	0.526653
CDC42SE1	0.45137	0.229533	0.0492441	0.526653
CLYBL	-0.706178	0.3585	0.0488599	0.526653
ECD	-0.587966	0.299193	0.0493943	0.526653
EGR1	-0.595111	0.301506	0.0484054	0.526653
GAB2	-0.388053	0.197378	0.0492934	0.526653
HNRNPL	-0.265176	0.13495	0.0494143	0.526653
HUWE1	-0.286238	0.14526	0.0487779	0.526653
LOC387723	-0.615308	0.311839	0.0484779	0.526653
MYOM2	0.93182	0.472431	0.0485645	0.526653
PRDM10	-0.685735	0.347966	0.0487588	0.526653
PRNP	0.290826	0.147343	0.0484037	0.526653
RABEP1	0.40325	0.20497	0.0491413	0.526653
RASSF1	-0.600052	0.304981	0.0491249	0.526653
RMI2	-0.510735	0.259309	0.0488844	0.526653
S100A6	0.391893	0.198496	0.0483468	0.526653
VTI1A	0.649045	0.329948	0.0491699	0.526653
WDR17	-0.720932	0.365193	0.0483688	0.526653
YEATS4	-0.346234	0.175986	0.0491377	0.526653
ZMYM6NB	-0.296155	0.150133	0.0485387	0.526653
CTSH	0.653845	0.333021	0.0496028	0.527112
FBXL5	0.380873	0.194004	0.0496201	0.527112
LY9	0.816716	0.415963	0.0495958	0.527112
ASL	0.664099	0.33866	0.0498833	0.528979
CDCA7L	-0.499919	0.25502	0.0499591	0.528979
ST8SIA4	0.399612	0.203825	0.0499293	0.528979

## Sheet: HSC
gene	Log2_FoldChange	lfcSE	pvalue	padj
PROK2	2.40596	0.486364	7.54287e-07	0.0082436
FAM178A	-0.922371	0.250894	0.0002366	0.417133
GLT1D1	2.34404	0.620428	0.000158035	0.417133
HKR1	-1.08399	0.293007	0.000215994	0.417133
MYO19	-1.28666	0.352971	0.000267173	0.417133
PREPL	0.995475	0.265782	0.000180063	0.417133
SMARCA1	-1.86635	0.503299	0.000208717	0.417133
GYPB	2.05256	0.575707	0.000363465	0.496539
KCNE1	3.92004	1.12429	0.000489068	0.593891
CLDN7	-1.93311	0.570404	0.00070143	0.638828
CYP2S1	2.07232	0.603903	0.00060016	0.638828
DLK1	-1.49598	0.441387	0.00070081	0.638828
PTBP2	-1.33216	0.403396	0.000958729	0.755236
RCAN1	1.54877	0.46935	0.000967454	0.755236
ADAMTS10	-1.76852	0.564425	0.00172844	0.914238
AGER	-1.74081	0.568559	0.00220019	0.914238
ALG2	0.813783	0.26019	0.00176213	0.914238
ARMCX4	-1.71713	0.575883	0.00286623	0.914238
CAPN11	-1.6303	0.538852	0.0024821	0.914238
CCDC163P	-1.82519	0.611211	0.00282473	0.914238
CFD	1.57113	0.526702	0.00285481	0.914238
CHURC1	-1.02863	0.322355	0.00141797	0.914238
EIF1AY	0.679794	0.220869	0.00208526	0.914238
FAM84B	-0.934513	0.314099	0.00292784	0.914238
FLVCR2	2.24375	0.74496	0.00259613	0.914238
GUSBP3	-1.82902	0.602145	0.00238539	0.914238
IL18R1	-1.44206	0.479581	0.00263912	0.914238
LOC143666	-1.68884	0.552517	0.00223845	0.914238
NLN	0.717371	0.230716	0.00187514	0.914238
PHKA1	-1.29801	0.432784	0.00270685	0.914238
PKNOX1	1.06766	0.345099	0.00197622	0.914238
RBMS1	1.05736	0.329747	0.00134324	0.914238
RHAG	2.27973	0.729338	0.00177347	0.914238
RUNDC3B	-2.20683	0.725803	0.00236162	0.914238
ZNF77	-1.77513	0.582268	0.00229878	0.914238
HELZ2	1.1617	0.392328	0.00306611	0.930821
ACTR2	0.525411	0.184067	0.00431096	0.942289
BCL3	1.00509	0.348545	0.0039306	0.942289
KIAA1549	-1.24528	0.425381	0.00341762	0.942289
LOC100506469	-1.22473	0.427525	0.00417417	0.942289
LOC338799	-1.1135	0.383397	0.00368083	0.942289
MICA	-1.10417	0.384305	0.004064	0.942289
MLF1	-1.35667	0.474776	0.00427001	0.942289
NCAPG	1.46353	0.50503	0.0037565	0.942289
PIAS2	-0.814227	0.281555	0.00382931	0.942289
PSMD6	0.52602	0.181553	0.00376343	0.942289
SCARNA22	2.08531	0.723266	0.00393668	0.942289
SORT1	0.878242	0.303212	0.00377393	0.942289
TECPR2	-1.19987	0.418367	0.00413088	0.942289
TUBG2	-1.266	0.430594	0.0032809	0.942289

## Sheet: MPP
gene	Log2_FoldChange	lfcSE	pvalue	padj
DLK1	-2.4202	0.537758	6.77846e-06	0.0746038
C16orf58	-1.15279	0.3079	0.000181087	0.17733
CDK18	-2.15916	0.577741	0.000186051	0.17733
CTSL1	2.65798	0.723406	0.000238547	0.17733
FAM86B3P	-3.39904	0.924129	0.000234981	0.17733
FNDC3B	1.62419	0.442449	0.000241681	0.17733
LIMK2	-2.53204	0.680593	0.000198949	0.17733
LPAR6	2.08831	0.552857	0.000158533	0.17733
MARCKSL1	-1.00544	0.263777	0.000138014	0.17733
MOB1B	2.12954	0.540535	8.15845e-05	0.17733
NAT6	-1.71184	0.446462	0.000125957	0.17733
PIKFYVE	2.20549	0.575073	0.000125489	0.17733
PLAGL2	-1.50144	0.367863	4.47403e-05	0.17733
PTEN	0.889313	0.241854	0.000235931	0.17733
ZFY	1.60475	0.408734	8.63119e-05	0.17733
ASPM	2.33342	0.661661	0.000420913	0.200452
ITGA4	1.27621	0.354853	0.000322576	0.200452
KCTD13	-1.30581	0.369766	0.00041329	0.200452
KPTN	-1.3924	0.392807	0.000393007	0.200452
LPP	1.13913	0.324932	0.000455324	0.200452
MPI	-1.18657	0.337913	0.000445615	0.200452
REEP3	1.21468	0.344834	0.000427499	0.200452
RNF13	1.39279	0.391468	0.000373887	0.200452
TNFSF10	1.42763	0.401438	0.000376144	0.200452
ZFC3H1	1.80471	0.508374	0.000385269	0.200452
FBXO5	1.66483	0.476393	0.000474677	0.200935
C5orf24	1.47767	0.438582	0.000753892	0.230481
CD9	-1.40547	0.413659	0.000679678	0.230481
CECR6	2.73088	0.806961	0.000713969	0.230481
DMXL2	2.05343	0.597922	0.000594127	0.230481
EIF5B	1.45769	0.427784	0.000655523	0.230481
ESF1	1.88186	0.558001	0.000744884	0.230481
FOXRED2	-1.20664	0.353476	0.000641017	0.230481
LOC440300	2.89161	0.852603	0.000695106	0.230481
SNAPIN	-0.895529	0.263268	0.00066995	0.230481
TCEA2	-1.23817	0.361333	0.000611037	0.230481
FAM217B	1.17327	0.350049	0.000803076	0.238883
BIRC3	1.61239	0.486397	0.000916542	0.265459
PGAP2	-1.29913	0.392873	0.000943853	0.26636
KIF5B	1.07641	0.327388	0.0010095	0.277764
PUS3	1.34101	0.408968	0.00104176	0.27965
COG6	1.2901	0.397539	0.00117366	0.30373
SGTB	1.50108	0.463878	0.00121247	0.30373
VSIG10L	-2.75159	0.850434	0.00121426	0.30373
OASL	3.10246	0.969035	0.00136668	0.320037
RAD21-AS1	3.1112	0.968515	0.00131657	0.320037
TPR	1.61702	0.50494	0.00136291	0.320037
AFMID	-1.46871	0.462172	0.00148378	0.326609
MORN4	-2.22982	0.70055	0.00145777	0.326609
NHP2	-0.721971	0.227122	0.00147892	0.326609
KRAS	1.21905	0.385035	0.0015451	0.327573
QPRT	-1.48742	0.469873	0.00154768	0.327573
MKLN1	1.0604	0.336581	0.0016299	0.338466
WDR55	-2.83647	0.903727	0.00169734	0.345944
MIER3	1.58571	0.506488	0.00174328	0.348845
BCL7B	-0.692328	0.222233	0.00183743	0.350048
NMB	-2.22712	0.715159	0.0018447	0.350048
ROBO3	-1.31149	0.420018	0.0017935	0.350048
NAAA	1.14738	0.370251	0.0019422	0.356264
ROCK2	1.60849	0.518542	0.00192253	0.356264
ABCD3	1.08091	0.351654	0.00211358	0.360108
ACER3	1.59668	0.527556	0.0024736	0.360108
ANKRD44	1.3933	0.456305	0.00226236	0.360108
CASP4	0.800286	0.263769	0.00241306	0.360108
HEG1	1.32911	0.439445	0.00249021	0.360108
KIAA1033	1.44775	0.468632	0.00200624	0.360108
KIAA2018	1.26189	0.417707	0.00251938	0.360108
LIMS1	1.07585	0.353469	0.002337	0.360108
LOX	-2.43491	0.793093	0.00213953	0.360108
MAN2A1	1.5793	0.522514	0.00250687	0.360108
MECR	-1.32786	0.432437	0.00213599	0.360108
PALM	-1.78915	0.592168	0.00251648	0.360108
PAPOLG	1.56079	0.51389	0.0023879	0.360108
RPF1	0.645575	0.212694	0.00240348	0.360108
RTN2	-1.38811	0.453315	0.0021976	0.360108
UBASH3B	2.08698	0.677046	0.00205283	0.360108
ZNF267	1.37899	0.453264	0.00234745	0.360108
L3MBTL2	-1.18982	0.39477	0.00257872	0.363865
MIR143HG	2.91483	0.969169	0.00263362	0.365718
TNFSF8	1.43483	0.477526	0.00265831	0.365718
MUTYH	-1.02349	0.341127	0.00269696	0.366454
CCDC106	-1.20872	0.408068	0.00305594	0.374281
CLK2	-0.785517	0.265336	0.00307175	0.374281
ETF1	0.624782	0.210466	0.00299201	0.374281
FAM207A	-1.30947	0.438934	0.00285152	0.374281
HSP90AA1	0.740709	0.251212	0.00319271	0.374281
KAT8	-0.815629	0.276656	0.00319666	0.374281
LINC00338	-1.30792	0.439651	0.00293071	0.374281
LRRC41	-1.00223	0.33524	0.0027934	0.374281
POLE	-1.201	0.405976	0.00309332	0.374281
TJAP1	-0.930361	0.313019	0.00295656	0.374281
TWF1	1.54736	0.523804	0.0031361	0.374281
TWISTNB	1.09911	0.37246	0.00316815	0.374281
ZMAT3	1.01961	0.343768	0.00301713	0.374281
ANKRD13C	1.49239	0.508554	0.00334008	0.386957
DNAJC30	-1.02887	0.352333	0.00349862	0.398391
TTLL1	-1.13117	0.387516	0.00351117	0.398391
CCDC163P	-1.61192	0.553808	0.00360716	0.398556
EPB41L3	1.38699	0.477238	0.00365747	0.398556
TMEM167A	0.813405	0.279795	0.00364738	0.398556
UNC13D	-0.678315	0.233101	0.00361476	0.398556
CDC5L	0.972331	0.336406	0.00384812	0.410534
CEACAM4	-2.11951	0.734516	0.0039069	0.410534
CSRP1	-0.541038	0.187429	0.00389391	0.410534
ZNF334	1.6682	0.578273	0.0039166	0.410534
ATP7B	-1.90215	0.66649	0.00431752	0.417782
ECI2	-0.756286	0.265061	0.00432738	0.417782
FAM135A	1.56002	0.544701	0.00418344	0.417782
KLHL8	1.43312	0.498309	0.00402797	0.417782
SLC39A13	-1.36879	0.477708	0.00416591	0.417782
TCEA1	0.588161	0.204718	0.00406556	0.417782
VKORC1	-0.69667	0.243582	0.00423499	0.417782
WDR33	0.76498	0.267033	0.0041735	0.417782
WDR46	-1.40184	0.490513	0.00426442	0.417782
HIVEP3	1.24419	0.437769	0.00448142	0.421404
HSPH1	0.980861	0.347826	0.00480276	0.421404
KHSRP	-0.758404	0.268271	0.00469857	0.421404
LOC100128822	-1.09808	0.387853	0.0046376	0.421404
PAPD5	1.35573	0.482708	0.00497593	0.421404
PCNXL3	1.10996	0.392863	0.00472368	0.421404
RABEP1	1.09763	0.386067	0.00446752	0.421404
RBM47	1.72511	0.614066	0.00496458	0.421404
RIOK3	1.19913	0.426842	0.00496475	0.421404
RPS6KA3	0.884853	0.315064	0.00497751	0.421404
SLC37A2	1.95682	0.693982	0.00480701	0.421404
TAOK1	1.26463	0.445904	0.0045666	0.421404
UTP11L	0.700733	0.248894	0.00487183	0.421404
VAMP1	1.8607	0.660005	0.00481396	0.421404
ZKSCAN5	-1.78699	0.629368	0.00452077	0.421404
ZNF568	1.74815	0.615507	0.0045089	0.421404
GTF2A2	0.650581	0.23261	0.00516003	0.433521
ACSS1	-0.869771	0.315749	0.00587588	0.438019
ALDH18A1	-0.81927	0.296334	0.00569779	0.438019
ANKH	-0.794536	0.285315	0.00535663	0.438019
C3orf62	1.53019	0.548915	0.00530893	0.438019
C4orf27	1.04095	0.37774	0.00585594	0.438019
CAPN7	-1.14651	0.413938	0.00560966	0.438019
COL4A3BP	1.46657	0.531419	0.00578489	0.438019
DDHD1	1.89457	0.683768	0.00559225	0.438019
DZANK1	-2.28138	0.827563	0.00583803	0.438019
EFR3A	1.24303	0.449793	0.00571763	0.438019
HAT1	0.811559	0.294901	0.00592384	0.438019
INPP5B	-1.09809	0.399262	0.0059543	0.438019
KIF3B	1.24783	0.454207	0.00600952	0.438019
LOC100287015	1.87672	0.682802	0.00598573	0.438019
LRRC8C	0.977077	0.352205	0.00553424	0.438019
MIB1	1.11401	0.403337	0.00574527	0.438019
PFKM	-1.01524	0.365738	0.00550537	0.438019
PRPF8	-0.621391	0.224558	0.00565451	0.438019
SMARCA5	0.847772	0.305487	0.0055177	0.438019
SYN1	-2.73468	0.992772	0.00587656	0.438019
USP1	0.85498	0.312202	0.00617121	0.446844
PTER	1.24076	0.454181	0.00629755	0.450071
ZSCAN30	-1.32515	0.485064	0.00629699	0.450071
EIF2AK1	-0.523899	0.192294	0.00644047	0.45149
NUMB	0.743761	0.272645	0.00637293	0.45149
UHRF2	1.32494	0.485976	0.00640388	0.45149
ASB1	1.93732	0.712361	0.00653645	0.455317
GBP3	1.72349	0.637182	0.00683325	0.467123
PNKD	-0.816691	0.301759	0.00680092	0.467123
TUBG2	-1.46987	0.542809	0.00677115	0.467123
DECR2	-1.67379	0.619745	0.00691777	0.469981
BMPR2	1.24755	0.462711	0.0070139	0.473589
ADK	-0.903311	0.337698	0.00747503	0.47555
EPDR1	-0.899861	0.335319	0.00728349	0.47555
FGL2	1.48358	0.554344	0.00744436	0.47555
FKBP15	1.09901	0.408638	0.00715701	0.47555
FTO	-0.75396	0.280292	0.00714704	0.47555
LOC100131289	-1.15154	0.429819	0.00738159	0.47555
RHOU	1.88008	0.701948	0.00739802	0.47555
SEC11C	0.889704	0.332246	0.00740967	0.47555
ZCCHC2	1.55328	0.580416	0.00744746	0.47555
ZFPL1	-0.999325	0.372351	0.00727842	0.47555
DNM1	-1.87082	0.702458	0.00773897	0.481215
P2RX1	-1.06623	0.399996	0.00768508	0.481215
TTN	2.62674	0.986133	0.00772908	0.481215
ZMYM1	1.85263	0.695194	0.00770078	0.481215
ZNF143	1.18245	0.445643	0.00796973	0.49278
SUB1	0.575193	0.216944	0.00801728	0.492951
ALG12	-1.05789	0.400869	0.00831521	0.503034
CA11	-2.39696	0.908969	0.00836409	0.503034
TIAL1	0.548604	0.207823	0.00829627	0.503034
VPS33B	-1.19582	0.453165	0.00831965	0.503034
PML	-0.590334	0.224271	0.00848267	0.507392
CCSAP	1.54431	0.587806	0.00860775	0.51183
GRB10	-1.01981	0.388584	0.00867969	0.51183
IDE	1.02756	0.392083	0.00877283	0.51183
NUP50	0.942037	0.359537	0.00878938	0.51183
ZCCHC7	1.21287	0.462286	0.00869953	0.51183
DHX32	-1.11746	0.426912	0.0088564	0.513019
FBXO33	0.85766	0.32841	0.00901326	0.519371
ADM	2.28637	0.878562	0.00925741	0.530543
CHD1L	-0.817545	0.314998	0.00944815	0.530543
MT-TK	1.22353	0.470906	0.00937002	0.530543
PBRM1	0.860901	0.33104	0.00930616	0.530543
SYDE1	-1.53912	0.592945	0.00943905	0.530543
HPS6	-1.4448	0.557971	0.00961466	0.532505
TMEM194B	-1.75934	0.678762	0.00954229	0.532505
TMEM245	0.880338	0.34027	0.00967664	0.532505
USP25	0.89048	0.343979	0.00963217	0.532505
TMEM138	0.978475	0.378641	0.00976132	0.534493
GINS3	-1.64802	0.641415	0.0101889	0.542325
LMAN2L	-0.907074	0.353088	0.0102	0.542325
NAT10	-0.717911	0.279426	0.0101922	0.542325
PSMA3	0.747599	0.290262	0.0100066	0.542325
SLC35A1	1.0935	0.424796	0.010048	0.542325
SUPT20H	0.96137	0.373805	0.0101158	0.542325
AGGF1	0.782463	0.306315	0.010636	0.543342
CTR9	0.645011	0.252595	0.0106634	0.543342
LAPTM4A	-0.478898	0.186764	0.0103416	0.543342
LYRM7	0.906901	0.353827	0.0103736	0.543342
NEK1	1.48492	0.580896	0.0105804	0.543342
RBMS1	0.906382	0.354283	0.0105168	0.543342
SND1-IT1	1.94009	0.756168	0.0102974	0.543342
TMUB1	-1.34248	0.524481	0.010478	0.543342
ZYG11B	0.769312	0.301069	0.0106104	0.543342
NXT1	-0.895715	0.351452	0.0108153	0.546023
UBE2W	0.931295	0.365395	0.0108114	0.546023
TRAPPC4	-0.999396	0.392424	0.0108739	0.546473
ARID4A	1.22493	0.481759	0.0110026	0.547171
CD200R1	2.8391	1.11609	0.0109655	0.547171
FAM204A	0.835163	0.328606	0.0110369	0.547171
APPL2	-1.05406	0.415419	0.0111697	0.550307
CLUHP3	-2.70255	1.06599	0.0112369	0.550307
COBLL1	1.81999	0.717994	0.0112502	0.550307
LFNG	1.53065	0.604736	0.0113704	0.553729
ZNF580	-0.999509	0.39521	0.0114368	0.554509
ABI1	0.694772	0.277464	0.0122795	0.560419
ACTR3	0.723276	0.288132	0.0120655	0.560419
ARMCX3	0.869229	0.346158	0.0120365	0.560419
ATF1	0.974148	0.390071	0.0125121	0.560419
BAZ1A	0.997432	0.399688	0.0125771	0.560419
C12orf68	-2.21104	0.88067	0.0120514	0.560419
CHUK	0.930725	0.369307	0.011729	0.560419
KCNJ12	-2.70904	1.08311	0.0123784	0.560419
LOC100506190	-2.16225	0.862995	0.0122272	0.560419
LRRC20	-1.70937	0.682116	0.0122111	0.560419
MICA	-1.19526	0.475542	0.0119553	0.560419
REL	1.55193	0.61829	0.0120719	0.560419
SCRN3	1.3761	0.551332	0.0125617	0.560419
SRF	-0.881948	0.351504	0.0121049	0.560419
SRM	-0.572235	0.229009	0.0124632	0.560419
SRRM1	0.683051	0.270714	0.011631	0.560419
STOML2	-0.638755	0.255384	0.0123789	0.560419
TRIM46	-2.04782	0.817808	0.0122785	0.560419
TRNT1	1.54557	0.615061	0.0119755	0.560419
USP32	1.82503	0.728046	0.0121848	0.560419
ARFIP1	1.07635	0.431746	0.0126664	0.561415
STARD3	-0.808672	0.324503	0.0127015	0.561415
TRIP12	0.902598	0.362629	0.012809	0.563901
ALKBH1	-1.49185	0.614237	0.0151494	0.565798
ARMC5	-1.29846	0.526348	0.0136278	0.565798
BCS1L	-0.81903	0.33504	0.0145023	0.565798
C19orf70	-0.796833	0.32354	0.0137833	0.565798
CALCOCO2	0.553228	0.228069	0.0152788	0.565798
CCBL2	0.748271	0.302335	0.0133246	0.565798
CRYGD	-1.06981	0.43872	0.0147491	0.565798
CUL5	1.10424	0.454377	0.0150896	0.565798
DHCR24	-1.47294	0.595131	0.0133242	0.565798
DNAJC13	1.09369	0.44347	0.0136548	0.565798
EMR1	1.62195	0.661482	0.0142069	0.565798
FAM127A	-0.558954	0.228089	0.0142622	0.565798
FBXL17	1.04297	0.428975	0.0150448	0.565798
FOXK1	-0.888531	0.363487	0.0145066	0.565798
IL6ST	1.04633	0.421633	0.0130788	0.565798
KIAA1143	0.719913	0.294768	0.0145938	0.565798
KRR1	1.215	0.497339	0.0145653	0.565798
LOC284023	-1.34938	0.552329	0.0145626	0.565798
LOC284578	4.39492	1.77529	0.013301	0.565798
LOC550112	-1.53162	0.630777	0.0151761	0.565798
LOC729732	-1.94216	0.799417	0.015121	0.565798
MFF	-0.542628	0.22275	0.0148488	0.565798
MOSPD3	-0.675863	0.273409	0.0134367	0.565798
MRPL45	-0.567343	0.232556	0.0147034	0.565798
NPM3	-0.703232	0.285437	0.0137509	0.565798
NXF1	-0.634469	0.261317	0.0151836	0.565798
OSBPL8	0.912751	0.376316	0.0152876	0.565798
OSTM1	1.1036	0.445822	0.0133075	0.565798
PIGK	0.821395	0.338856	0.0153495	0.565798
PLK3	-1.81093	0.739471	0.0143274	0.565798
RAD50	1.27663	0.514181	0.0130337	0.565798
RBL2	1.15937	0.469444	0.0135242	0.565798
RBM43	1.85129	0.755283	0.0142415	0.565798
RNF114	-0.533371	0.218367	0.0145843	0.565798
RPH3AL	-1.50017	0.619004	0.015371	0.565798
SEMA3C	1.68678	0.69538	0.015279	0.565798
SHF	-1.75984	0.719759	0.0144835	0.565798
SLC38A2	0.659083	0.267601	0.0137807	0.565798
SLC4A1	1.59309	0.653556	0.0147865	0.565798
SLX4	-2.06611	0.839975	0.0139042	0.565798
TACC3	-0.569604	0.234957	0.015338	0.565798
TMEM87B	0.907006	0.373675	0.0152135	0.565798
TOPBP1	1.02641	0.420124	0.0145612	0.565798
TRAF3IP2	-0.852559	0.34832	0.0143799	0.565798
UBE2K	0.75829	0.312185	0.0151415	0.565798
WDR18	-0.820547	0.332819	0.0136844	0.565798
XRN1	1.10769	0.452121	0.0142859	0.565798
ZNF652	1.06675	0.431283	0.013382	0.565798
ZSWIM4	-1.20357	0.494491	0.0149351	0.565798
ACAD9	-1.10297	0.457564	0.0159292	0.566574
ALYREF	-0.574411	0.237553	0.0156045	0.566574
ASAP1	1.29733	0.539989	0.0162831	0.566574
DBF4	0.856043	0.356431	0.0163187	0.566574
EFNA3	-1.11504	0.464006	0.0162575	0.566574
FEM1C	1.02519	0.423806	0.0155626	0.566574
FICD	2.16894	0.897903	0.0157109	0.566574
GIPC3	-1.70488	0.708618	0.016132	0.566574
GTPBP2	-0.811735	0.337201	0.0160722	0.566574
KLC4	-1.23495	0.510227	0.0155035	0.566574
MAL	1.95048	0.810497	0.016105	0.566574
NCAPD3	-0.764784	0.31815	0.0162236	0.566574
NEDD1	1.20094	0.496156	0.0155001	0.566574
PRPF40A	0.720414	0.299223	0.0160572	0.566574
PWWP2A	0.892338	0.36977	0.015812	0.566574
SIPA1L1	1.19848	0.497765	0.0160521	0.566574
TIAM1	1.87438	0.776242	0.0157487	0.566574
ZNF219	-0.918449	0.381717	0.016124	0.566574
RRP15	0.861961	0.359875	0.0166127	0.574965
PTK7	-1.22466	0.511563	0.0166677	0.575063
LINC00339	-1.14387	0.478099	0.0167327	0.575501
FAM118A	1.5518	0.650173	0.0169978	0.580578
HMGCR	0.861746	0.361063	0.0170008	0.580578
LOC389641	-1.24007	0.519756	0.0170386	0.580578
USP28	1.03253	0.433015	0.0171018	0.580934
BLNK	1.79777	0.754782	0.0172261	0.583303
DYRK2	1.23678	0.519986	0.0173835	0.583303
GOLPH3L	-0.793802	0.333693	0.0173673	0.583303
PEAR1	-1.53627	0.64584	0.0173727	0.583303
SREK1IP1	0.818308	0.344242	0.017448	0.583686
CLIC2	-0.952995	0.402928	0.0180216	0.585346
DCTD	-0.577116	0.24405	0.0180423	0.585346
FAH	-0.867711	0.367064	0.0180827	0.585346
FTSJ3	0.967482	0.408113	0.0177581	0.585346
GPCPD1	0.950905	0.401249	0.0177947	0.585346
MPL	-0.915965	0.386465	0.0177826	0.585346
MTA2	-0.589517	0.249174	0.0179872	0.585346
MTPAP	1.08026	0.456202	0.0178877	0.585346
PELP1	-0.719143	0.303225	0.0177089	0.585346
RSL24D1	0.454291	0.19203	0.0179943	0.585346
TMCC1	1.3841	0.584925	0.0179674	0.585346
GTF3C6	0.725831	0.307393	0.0182135	0.587506
MIPEP	-1.48957	0.631089	0.018259	0.587506
ZMIZ2	-1.15081	0.487777	0.0183095	0.587506
ACAD8	1.02192	0.434371	0.018641	0.592221
ASH1L	1.27933	0.544022	0.0186922	0.592221
FXYD5	-0.462413	0.197251	0.0190635	0.592221
GLIPR2	1.02388	0.435891	0.0188269	0.592221
HYDIN2	2.17351	0.925986	0.018913	0.592221
NARS	0.646592	0.274753	0.0186047	0.592221
PIM1	-0.638707	0.272092	0.0189055	0.592221
PROSER1	-0.795566	0.339473	0.0191022	0.592221
SECISBP2	1.39645	0.595222	0.0189712	0.592221
TMCO6	-0.8085	0.343924	0.0187328	0.592221
TULP3	1.67495	0.713125	0.0188365	0.592221
WDR6	-0.941706	0.401575	0.0190256	0.592221
AMMECR1L	-1.14735	0.490219	0.0192583	0.595077
ETS2	-0.58281	0.249214	0.0193565	0.595077
KIAA1598	1.33637	0.571337	0.0193346	0.595077
FAM101B	0.398995	0.170729	0.0194389	0.595945
IFFO1	-1.14203	0.488921	0.0195005	0.596174
CLTA	-0.456052	0.195488	0.0196541	0.597351
IRAK3	0.64259	0.275496	0.0196754	0.597351
LOC400752	-2.14519	0.920307	0.0197561	0.597351
SYNGR1	-0.615181	0.263906	0.0197503	0.597351
GORAB	1.54338	0.662527	0.0198305	0.597956
ATN1	-0.925888	0.397748	0.0199214	0.599057
ARMCX4	-1.91647	0.825161	0.0202039	0.599278
LOC100129858	1.80277	0.77588	0.0201517	0.599278
NINJ2	-0.784513	0.338274	0.0203861	0.599278
RPL32P3	1.06247	0.458246	0.0204188	0.599278
SHANK3	-0.922611	0.397909	0.0204141	0.599278
SNAPC3	1.59139	0.685442	0.0202493	0.599278
TMX3	0.734403	0.316266	0.020227	0.599278
ZNF567	1.67846	0.721927	0.0200732	0.599278
ZNF649	-1.56859	0.675801	0.0202823	0.599278
ARL8B	0.700118	0.302171	0.0205058	0.59948
HIST2H2BE	-0.945137	0.40819	0.0205891	0.59948
KIF9	-1.28259	0.553742	0.0205457	0.59948
TPTE2P1	2.26924	0.980966	0.0207079	0.599766
ZFYVE21	-1.14139	0.493306	0.0206809	0.599766
BAZ2B	1.29773	0.561742	0.0208781	0.60311
C14orf93	-0.966994	0.419036	0.0210178	0.603975
SHMT1	-1.04075	0.450953	0.0210055	0.603975
CLDN7	-1.65754	0.719924	0.0213134	0.607363
EXOSC7	-0.75423	0.327484	0.0212731	0.607363
PSMA4	0.49786	0.216299	0.0213508	0.607363
USP34	0.65617	0.28509	0.0213565	0.607363
CTIF	1.79031	0.778248	0.0214233	0.607694
MDC1	-0.887382	0.386231	0.0215879	0.610787
ARHGAP15	0.716485	0.312463	0.0218465	0.612542
CDPF1	-1.00984	0.440114	0.0217619	0.612542
COQ6	-1.13054	0.493337	0.0219282	0.612542
SELT	0.498888	0.21765	0.0218963	0.612542
TRPM7	0.90915	0.396308	0.0217876	0.612542
EPB42	1.7758	0.775258	0.0219868	0.612569
TRIM14	-0.797031	0.348099	0.0220405	0.612569
DOCK5	2.15272	0.944454	0.0226474	0.614373
FAM86FP	-1.9117	0.838825	0.0226658	0.614373
GABPB1-AS1	1.43298	0.62698	0.0222814	0.614373
GRASP	-1.35277	0.593058	0.0225479	0.614373
GRIK5	-1.07475	0.471644	0.0226829	0.614373
LILRB1	1.66832	0.731708	0.0226056	0.614373
MON1B	2.089	0.914545	0.0223599	0.614373
SKA1	1.73511	0.759518	0.0223429	0.614373
TRIM35	-0.97711	0.428911	0.0227194	0.614373
XXYLT1	-0.832333	0.364187	0.0222862	0.614373
ZNF490	-0.983949	0.431799	0.0226836	0.614373
SNRPB2	0.49294	0.216577	0.0228427	0.616193
LRRC8B	1.08847	0.478941	0.0230461	0.617143
PIK3CG	0.801404	0.352538	0.0230117	0.617143
TBC1D22A	-0.936771	0.412161	0.0230367	0.617143
ZNF91	1.46855	0.647345	0.0232945	0.62228
FAM189B	-1.11948	0.494711	0.0236421	0.627319
LOC644961	1.76899	0.781805	0.0236541	0.627319
OTUD5	-0.646386	0.285572	0.0236061	0.627319
C10orf137	1.58481	0.701602	0.0238933	0.628269
CLPTM1L	-0.494137	0.218885	0.0239754	0.628269
DIABLO	-0.498097	0.220577	0.0239361	0.628269
LOC100507433	-2.21997	0.982577	0.0238624	0.628269
UBE2E3	-0.461224	0.204134	0.0238572	0.628269
DOCK11	0.765811	0.339566	0.0241167	0.630472
ANKRD9	1.15061	0.512534	0.0247717	0.631051
CD82	-0.859699	0.382081	0.0244462	0.631051
CIRBP	-0.48229	0.214736	0.0247064	0.631051
DCTN4	0.647962	0.287812	0.0243642	0.631051
DUSP10	-0.724185	0.322665	0.0248076	0.631051
EIF3G	-0.504324	0.223894	0.0242903	0.631051
NCF2	1.31058	0.584152	0.0248611	0.631051
NLGN2	-1.45812	0.649641	0.0248004	0.631051
PHTF2	1.55444	0.692628	0.0248153	0.631051
SPCS3	0.511501	0.22715	0.0243339	0.631051
SPOPL	1.23912	0.552391	0.0248843	0.631051
TOMM70A	0.731972	0.325605	0.0245739	0.631051
WDR34	-1.41159	0.628705	0.0247527	0.631051
CHST12	-0.702796	0.313778	0.0251047	0.63227
JAK2	1.28217	0.572007	0.0249918	0.63227
RBBP8	0.779126	0.347817	0.0250879	0.63227
ZNF174	-1.03819	0.464031	0.0252653	0.634862
CALM2	0.333719	0.149296	0.0253989	0.635174
KCMF1	0.494548	0.221412	0.0255085	0.635174
SLC39A4	-0.732538	0.327706	0.0253944	0.635174
STK38	0.76927	0.344375	0.0254955	0.635174
ATP13A2	-0.772653	0.347282	0.0260905	0.635292
CD93	1.23321	0.553255	0.0258136	0.635292
CYTL1	-0.741042	0.332989	0.0260527	0.635292
DAAM1	1.13818	0.510994	0.0259218	0.635292
FLJ27352	-2.30822	1.03424	0.0256283	0.635292
IPW	-1.74773	0.784658	0.0259218	0.635292
LARP4	0.951277	0.427304	0.0259988	0.635292
MATK	-0.986183	0.442201	0.0257362	0.635292
SLC38A1	0.963971	0.432834	0.0259398	0.635292
SYT15	1.62516	0.730394	0.0260781	0.635292
LZTS2	-1.05595	0.475244	0.0262891	0.635908
QSOX2	-1.33069	0.598759	0.0262557	0.635908
SETD8	1.09985	0.494712	0.0262019	0.635908
GVINP1	1.1971	0.54001	0.0266355	0.636097
HLCS	-1.48338	0.669004	0.0266029	0.636097
MRPS10	0.685221	0.308692	0.0264355	0.636097
RAP1B	0.448423	0.202293	0.0266437	0.636097
TOMM20	0.502714	0.226538	0.0264788	0.636097
VAMP4	0.718804	0.324079	0.0265556	0.636097
MYO5A	0.949762	0.42877	0.0267541	0.63735
KDM5A	0.72019	0.32532	0.0268432	0.638091
ADRA2A	-1.73624	0.78641	0.0272577	0.640447
DUSP3	0.655347	0.296442	0.0270562	0.640447
MEF2D	-0.705264	0.319573	0.0273215	0.640447
MMAA	1.26213	0.571356	0.027174	0.640447
MT-TH	1.25095	0.566939	0.0273496	0.640447
RAD21	0.559876	0.253729	0.0273427	0.640447
TMEM159	-0.612962	0.27743	0.0271448	0.640447
MMP28	-1.0473	0.474946	0.0274482	0.64139
MCM5	-0.612882	0.278205	0.0275955	0.642106
ZNF281	1.1017	0.499974	0.0275588	0.642106
CCNB1IP1	-0.531387	0.241949	0.0280718	0.642948
DAXX	0.714694	0.32583	0.0282743	0.642948
FBXO44	-1.53642	0.699797	0.0281267	0.642948
LOC220729	1.41001	0.642279	0.028141	0.642948
MYL9	-1.35013	0.615463	0.0282579	0.642948
PFN1P2	2.10788	0.959472	0.0280262	0.642948
SLC22A15	1.41318	0.643313	0.02804	0.642948
TBL2	-0.938917	0.428041	0.0282697	0.642948
TRPT1	-0.709487	0.32344	0.0282666	0.642948
TSPYL4	-0.735148	0.334265	0.0278569	0.642948
ZMAT2	0.546322	0.248523	0.0279294	0.642948
ARRDC4	0.867679	0.398207	0.0293342	0.643638
C15orf40	-0.928797	0.427602	0.0298476	0.643638
CBX2	-0.923045	0.424528	0.0296837	0.643638
CDC27	0.691564	0.315759	0.0285124	0.643638
CDC73	0.737899	0.338039	0.0290446	0.643638
DCAKD	-0.892192	0.407299	0.0284875	0.643638
DNM1L	0.808405	0.36923	0.0285654	0.643638
HMOX1	1.35998	0.622914	0.0290167	0.643638
KIF18A	1.64372	0.751617	0.028749	0.643638
LACTB	1.07333	0.494046	0.0298164	0.643638
MPRIP	-0.670941	0.307082	0.0288969	0.643638
N4BP1	0.966207	0.44524	0.0300006	0.643638
NEK2	0.979709	0.449567	0.0293146	0.643638
NME4	-0.567045	0.259636	0.0289624	0.643638
PAK4	-0.895441	0.411269	0.029461	0.643638
PPARGC1B	-1.26312	0.581394	0.0298125	0.643638
RAB13	-0.929303	0.426981	0.0295218	0.643638
RFX7	0.772095	0.354896	0.0295887	0.643638
SARNP	0.748639	0.344076	0.0295706	0.643638
SLC25A36	0.869992	0.398826	0.0291549	0.643638
SMIM15	0.713992	0.328192	0.0295901	0.643638
STAT3	-0.48063	0.22077	0.0294757	0.643638
THOC2	0.903943	0.416302	0.0299036	0.643638
TRIM3	-1.53223	0.706022	0.02999	0.643638
TRIT1	1.17614	0.541295	0.0297934	0.643638
TSC2	-0.679488	0.311674	0.0292483	0.643638
UBE2V2	0.827113	0.378707	0.0289589	0.643638
USP22	-0.562349	0.256988	0.0286527	0.643638
ZNF480	1.36954	0.630971	0.0299672	0.643638
BCCIP	0.759323	0.350347	0.0302088	0.646211
ZNF714	-1.2404	0.572414	0.0302379	0.646211
USP3	0.972624	0.449338	0.0304204	0.648852
PUM2	0.445173	0.205746	0.0304868	0.649009
C1orf131	-1.20635	0.558422	0.0307504	0.649523
HYMAI	-2.28879	1.05963	0.030773	0.649523
MGMT	-0.959184	0.444155	0.030806	0.649523
MMD	0.781607	0.361708	0.0307047	0.649523
SVOPL	-1.39252	0.644245	0.0306582	0.649523
CSNK2A1	-0.505265	0.23405	0.0308666	0.649556
RFC1	0.84957	0.39383	0.0309903	0.650914
ALDH5A1	-0.966522	0.44926	0.0314476	0.651484
DYNLT3	0.888752	0.413505	0.0316093	0.651484
EDF1	-0.423349	0.196594	0.0312858	0.651484
ENPP4	2.05506	0.954735	0.0313586	0.651484
FCRL1	2.31851	1.0773	0.0313853	0.651484
IL17RC	-1.19045	0.55239	0.0311555	0.651484
NCOR1	0.560324	0.26003	0.0311737	0.651484
NUPR1L	-1.57076	0.73024	0.0314751	0.651484
STX4	1.03116	0.479468	0.0315054	0.651484
UBE2Q2	0.621359	0.289068	0.0315931	0.651484
MRPL55	-0.841214	0.391958	0.0318584	0.652949
RBPMS	-0.842339	0.39248	0.0318573	0.652949
TET2	1.01955	0.474811	0.0317714	0.652949
SEL1L	0.871547	0.406299	0.0319459	0.653526
AGAP2	-0.939099	0.439936	0.0327914	0.654585
BET1L	-0.976649	0.460712	0.0340171	0.654585
DNAJC1	0.580634	0.27125	0.0323072	0.654585
DYRK4	0.647012	0.302276	0.0323169	0.654585
EHBP1L1	1.23729	0.583851	0.0340743	0.654585
EHD2	-0.775788	0.365966	0.0340198	0.654585
GTF3C1	-0.638079	0.300274	0.0335875	0.654585
GTPBP4	0.677224	0.316504	0.0323786	0.654585
GUCD1	-0.710783	0.332833	0.0327157	0.654585
HPS4	-0.660274	0.309889	0.0331156	0.654585
ISCA2	0.65622	0.306514	0.0322811	0.654585
LRRC61	-0.997725	0.469567	0.0336052	0.654585
LRRC8D	0.617831	0.290638	0.0335224	0.654585
LRRK2	1.37445	0.648593	0.0340793	0.654585
43525	1.05834	0.498277	0.0336693	0.654585
MRPS36	0.870163	0.409879	0.0337557	0.654585
MT-TS2	1.12379	0.529283	0.0337338	0.654585
NAA15	0.722982	0.339396	0.033155	0.654585
NMNAT3	-0.78566	0.368088	0.0328073	0.654585
NOB1	-0.572328	0.268878	0.0332894	0.654585
PHLDB2	1.25978	0.592666	0.0335347	0.654585
PRKAR1B	-1.22291	0.572373	0.0326342	0.654585
RBM14	-0.578995	0.272277	0.0334622	0.654585
RC3H1	0.908226	0.424613	0.0324398	0.654585
RPS6KC1	0.774987	0.365059	0.0337614	0.654585
SERPINF1	1.20095	0.561301	0.0323888	0.654585
SGPP1	0.895989	0.419335	0.0326232	0.654585
SPTAN1	-0.734778	0.344418	0.0328929	0.654585
THBS1	1.21923	0.574631	0.0338579	0.654585
THOC5	-1.30769	0.615753	0.0336932	0.654585
UIMC1	0.788201	0.37088	0.0335683	0.654585
ZNF280D	0.827251	0.388326	0.0331467	0.654585
ZNF346	-1.0875	0.511611	0.0335331	0.654585
ZNF746	-0.711632	0.33541	0.0338648	0.654585
ZSCAN5A	-1.33639	0.62618	0.0328273	0.654585
ZNF83	1.11738	0.527541	0.0341678	0.655141
C9orf89	-0.663763	0.313616	0.0343035	0.655458
EEPD1	1.14147	0.539193	0.0342598	0.655458
PDP1	0.872771	0.41268	0.0344399	0.656924
HPS1	-0.496745	0.235169	0.0346621	0.658858
MRPL19	-0.762185	0.360952	0.0347209	0.658858
VPS51	-0.564035	0.267062	0.0346863	0.658858
ADD1	-0.48459	0.230189	0.0352751	0.664791
ATL1	1.52325	0.7231	0.0351562	0.664791
NCKAP1	1.54898	0.735133	0.0351117	0.664791
RNF24	-0.515631	0.244879	0.035234	0.664791
FAM219B	-0.741264	0.353186	0.0358352	0.670847
MFAP2	-1.09029	0.51948	0.0358335	0.670847
SBF2-AS1	1.81394	0.863716	0.0357153	0.670847
VPS13C	0.7363	0.35083	0.0358402	0.670847
KRBOX4	1.17272	0.558984	0.0359096	0.671003
ANKS6	-1.29594	0.622173	0.0372584	0.67511
ARHGEF39	-1.67973	0.80391	0.036667	0.67511
C6orf211	1.07024	0.511494	0.0364038	0.67511
C8orf33	-0.53921	0.258908	0.0372851	0.67511
C9orf72	1.03674	0.497702	0.0372469	0.67511
CD79B	1.01554	0.48732	0.0371674	0.67511
CREBBP	0.692268	0.332077	0.0371	0.67511
ERMP1	-0.847781	0.407074	0.0372859	0.67511
ESYT1	-0.467117	0.223966	0.0370096	0.67511
FAM50A	0.881384	0.422532	0.0369825	0.67511
FPGS	-0.868316	0.416068	0.036892	0.67511
GSTM5	-1.05133	0.503523	0.0368018	0.67511
MT-TM	0.954857	0.457332	0.0368083	0.67511
NHLRC1	-1.75307	0.839294	0.0367312	0.67511
NR3C1	0.560145	0.269156	0.0374233	0.67511
PKN3	-0.944622	0.452785	0.0369562	0.67511
PTPRE	0.847606	0.406262	0.0369468	0.67511
PTRF	-0.829173	0.397631	0.0370438	0.67511
SMO	-1.06077	0.509862	0.0374788	0.67511
TAX1BP1	0.749405	0.359859	0.037297	0.67511
TET3	0.922947	0.441949	0.0367656	0.67511
TOM1L2	-0.987895	0.474583	0.0373784	0.67511
ATP6V1D	0.666823	0.320614	0.037541	0.675124
ABI2	0.776608	0.374312	0.0380089	0.676368
ATAD2B	1.3823	0.666435	0.038064	0.676368
CCNL2	0.648015	0.312583	0.0381632	0.676368
CECR1	0.894104	0.430664	0.0378841	0.676368
DHX34	-1.00793	0.486088	0.038121	0.676368
KIF14	1.75449	0.845251	0.0379216	0.676368
PRMT10	1.31991	0.63658	0.0381311	0.676368
TFDP1	-0.421368	0.20274	0.0376759	0.676368
TNPO1	0.568897	0.274236	0.0380349	0.676368
B3GNT2	-0.618621	0.298523	0.03824	0.676639
ABHD5	1.20271	0.581737	0.0386927	0.677288
HDLBP	0.57844	0.279742	0.0386624	0.677288
PEPD	-0.654815	0.316601	0.0386153	0.677288
PPARD	1.51808	0.734334	0.0387075	0.677288
PPP1R15B	0.766165	0.370161	0.0384697	0.677288
PRKAB2	-1.05927	0.511493	0.0383655	0.677288
SNX4	0.74954	0.361999	0.0384002	0.677288
ACBD5	0.980818	0.489358	0.0450386	0.679208
AKIRIN2	0.550134	0.27606	0.0462828	0.679208
ANKMY1	-1.7024	0.859966	0.0477476	0.679208
APOL3	0.70141	0.342035	0.0402966	0.679208
ARL6IP4	-0.403909	0.196126	0.0394523	0.679208
BHLHB9	1.52508	0.766837	0.0467241	0.679208
BOLA1	-0.707865	0.346606	0.0411244	0.679208
C1orf216	-1.42052	0.705058	0.0439298	0.679208
C6orf120	0.666649	0.335895	0.0471782	0.679208
CACYBP	0.474834	0.231538	0.0402877	0.679208
CAST	0.822784	0.4042	0.0417922	0.679208
CBX7	-1.2684	0.637414	0.0465997	0.679208
CCDC117	-0.862829	0.435695	0.0476639	0.679208
CCDC51	-1.46386	0.726318	0.0438578	0.679208
CCNT1	0.753156	0.372081	0.0429527	0.679208
CCR2	1.40356	0.702935	0.0458557	0.679208
CEP152	1.26444	0.627091	0.0437623	0.679208
CLSPN	1.00717	0.501756	0.044719	0.679208
CNNM3	-0.703545	0.353708	0.0466948	0.679208
CYB561D1	1.4756	0.72269	0.0411699	0.679208
DEGS1	-0.635339	0.315094	0.0437632	0.679208
DERL1	-0.466769	0.229438	0.0419114	0.679208
DIRAS1	-1.34113	0.673066	0.0463089	0.679208
DMTF1	1.24231	0.612522	0.0425406	0.679208
EFCC1	-1.39408	0.685241	0.0419067	0.679208
ESCO1	1.01878	0.502794	0.0427414	0.679208
FAM114A2	0.804559	0.389686	0.0389574	0.679208
FAM193A	-0.775912	0.384271	0.0434686	0.679208
FAM57A	-1.13205	0.565051	0.0451283	0.679208
FCGR3A	1.45573	0.727262	0.0453209	0.679208
FLJ20021	-1.21305	0.6106	0.0469615	0.679208
FLJ31306	0.810735	0.407211	0.0464869	0.679208
FOCAD	-0.942978	0.476169	0.0476649	0.679208
GAMT	-0.795117	0.385642	0.0392267	0.679208
GK5	1.13477	0.573767	0.0479559	0.679208
GNAI3	0.488536	0.241589	0.0431578	0.679208
HBS1L	0.800455	0.397322	0.0439439	0.679208
HDAC7	-0.652224	0.329588	0.0478265	0.679208
HGF	1.47299	0.733928	0.0447502	0.679208
HIF1A	1.58957	0.791362	0.0445746	0.679208
HLA-J	-1.92542	0.952103	0.0431469	0.679208
HRH2	1.74903	0.870576	0.0445315	0.679208
IGFBP2	-1.68639	0.846051	0.0462337	0.679208
IL1RN	1.26521	0.615164	0.0397149	0.679208
ITPKB	-0.670628	0.330892	0.0426902	0.679208
JAM3	1.25653	0.614147	0.0407587	0.679208
JHDM1D	1.56147	0.78655	0.0471204	0.679208
JMJD1C	1.04576	0.52889	0.0480106	0.679208
JPH4	-1.85739	0.931114	0.0460647	0.679208
KCTD20	0.98055	0.494924	0.0475675	0.679208
KLHL18	1.3245	0.660481	0.0449241	0.679208
LINC00263	-0.897077	0.440616	0.0417542	0.679208
LMF2	-0.735834	0.358822	0.0402967	0.679208
LOC100505761	-0.740078	0.370925	0.0460185	0.679208
LOC202781	-1.01406	0.495999	0.0409068	0.679208
LOC339803	-1.06234	0.531471	0.0456235	0.679208
LPGAT1	0.703738	0.344477	0.0410609	0.679208
LRFN1	-1.26957	0.635539	0.0457568	0.679208
LYPD3	-1.70435	0.851381	0.0452988	0.679208
MAK16	0.724878	0.355289	0.0413258	0.679208
MAP2K5	-0.953834	0.463446	0.0395773	0.679208
MAP3K3	0.74705	0.368801	0.0428041	0.679208
MAPKBP1	-1.16155	0.566265	0.0402426	0.679208
MCTP1	1.41688	0.709645	0.0458688	0.679208
MEGF9	0.953208	0.465873	0.0407494	0.679208
MEIS1-AS3	-1.7832	0.887945	0.0446185	0.679208
MIA3	-0.881144	0.429419	0.0401751	0.679208
MKRN1	0.435753	0.216441	0.0440866	0.679208
MLC1	-0.718523	0.361677	0.0469622	0.679208
MLH3	1.10338	0.545577	0.0431336	0.679208
MLLT10	-0.575087	0.286836	0.0449699	0.679208
MLLT11	-0.850534	0.416686	0.0412322	0.679208
MPP5	1.38331	0.699067	0.0478394	0.679208
MRPL16	-0.579712	0.288072	0.0441794	0.679208
MS4A4A	1.33457	0.656158	0.0419593	0.679208
MSH3	0.989442	0.500312	0.047968	0.679208
MT-TV	0.972828	0.49067	0.0474061	0.679208
MTMR10	0.989186	0.488719	0.0429662	0.679208
NARFL	-1.2607	0.620557	0.0421975	0.679208
NCAPH2	-0.866905	0.431851	0.0447054	0.679208
NCBP1	0.720162	0.352799	0.041223	0.679208
NCKIPSD	-1.08027	0.539055	0.0450682	0.679208
NCSTN	-0.503825	0.24487	0.0396363	0.679208
NDUFAF7	1.0145	0.494045	0.0400293	0.679208
NPEPPS	0.600556	0.302717	0.0472687	0.679208
ODF3B	1.4332	0.702192	0.0412471	0.679208
OPA1	0.681627	0.335298	0.0420627	0.679208
PCYT2	-0.955541	0.463174	0.0391097	0.679208
PHF20L1	0.792406	0.392227	0.0433547	0.679208
PHF8	0.766059	0.37657	0.0419209	0.679208
PIP5K1A	-1.20981	0.602635	0.0446929	0.679208
PNPO	-0.575985	0.287654	0.0452469	0.679208
POLR2G	-0.476504	0.234815	0.04243	0.679208
PPIP5K2	0.736747	0.362321	0.0420115	0.679208
PPP1R16A	-1.11332	0.539671	0.039116	0.679208
RAB39B	-1.53602	0.771445	0.0464704	0.679208
RFX1	0.841807	0.412948	0.0414967	0.679208
RHOQ	0.975814	0.475579	0.0401846	0.679208
RHPN1	-1.08329	0.535864	0.0432204	0.679208
RMDN1	0.726271	0.364756	0.0464682	0.679208
RNF220	-0.500351	0.247511	0.0432247	0.679208
RPL6	0.302412	0.149582	0.0432068	0.679208
SAR1A	0.602411	0.303548	0.0471932	0.679208
SART1	-0.536495	0.263291	0.0415847	0.679208
SGOL2	1.1822	0.579072	0.0411965	0.679208
SHISA9	1.73058	0.864136	0.0452127	0.679208
SHOC2	0.704671	0.349403	0.0437177	0.679208
SIMC1	1.46585	0.71698	0.0409068	0.679208
SLC16A11	-2.01823	1.01089	0.0458813	0.679208
SLC31A2	1.03777	0.513744	0.0433827	0.679208
ST3GAL5	-1.27294	0.623444	0.0411726	0.679208
STIL	1.29392	0.647529	0.0456898	0.679208
SULF2	1.41948	0.701854	0.043127	0.679208
TAF3	0.962911	0.480778	0.0451969	0.679208
TCF19	-0.642924	0.321936	0.0458192	0.679208
TCL1A	1.5289	0.770629	0.0472596	0.679208
TEX261	-0.552118	0.276246	0.0456462	0.679208
TGIF2	-0.741114	0.372525	0.0466536	0.679208
THAP11	-0.650422	0.322921	0.0439906	0.679208
THNSL2	-1.98242	0.99725	0.0468242	0.679208
TIMM50	-0.531152	0.268152	0.0476151	0.679208
TIMP3	-0.980991	0.478372	0.0402973	0.679208
TM2D1	-0.612416	0.307676	0.0465403	0.679208
TMED10	0.396381	0.200293	0.047816	0.679208
TMEM246	-0.990826	0.500847	0.0478947	0.679208
TMEM41B	0.876785	0.435354	0.0440138	0.679208
TMEM56	2.05148	1.00028	0.0402767	0.679208
TMEM57	0.76351	0.373655	0.0410173	0.679208
TOM1	0.746965	0.376485	0.0472503	0.679208
TPX2	-0.671016	0.327433	0.0404306	0.679208
TRIM58	0.801926	0.40322	0.0467225	0.679208
TRMT1L	0.878101	0.439895	0.0459166	0.679208
TSHZ1	0.695307	0.343364	0.042869	0.679208
TSPAN33	-0.880648	0.43152	0.04127	0.679208
UBL3	0.62597	0.314769	0.0467381	0.679208
UGT3A2	2.7144	1.35257	0.0447657	0.679208
URB1	-0.974866	0.492355	0.0477028	0.679208
USP8	1.14289	0.554798	0.0393971	0.679208
USP9Y	-1.05787	0.535019	0.0480123	0.679208
VWA8	0.813322	0.397963	0.0409819	0.679208
WDFY1	0.873847	0.433493	0.043818	0.679208
WDR5B	-1.06591	0.522119	0.0412008	0.679208
WDR75	-0.98211	0.47787	0.0398613	0.679208
ZAK	0.804381	0.399184	0.0438979	0.679208
ZBTB39	-1.15672	0.583508	0.0474393	0.679208
ZC2HC1A	-1.32876	0.661492	0.0445654	0.679208
ZNF16	-1.03961	0.515906	0.0438918	0.679208
ZNF829	1.51386	0.736246	0.039765	0.679208
ZNHIT1	-0.45571	0.228496	0.0461098	0.679208
TUBGCP4	0.874759	0.442534	0.0480752	0.679225
ARHGAP31	0.809773	0.410543	0.0485587	0.679838
C16orf55	-1.2961	0.656045	0.0481968	0.679838
CR1	1.3535	0.685593	0.0483585	0.679838
ERAL1	-0.71265	0.361042	0.0483963	0.679838
HAUS5	-0.770453	0.390846	0.0486961	0.679838
IDS	-0.574854	0.291672	0.0487364	0.679838
JMJD8	-0.635092	0.322213	0.0487199	0.679838
NPHP4	-1.57585	0.798773	0.0485133	0.679838
TBC1D23	0.822685	0.416536	0.0482608	0.679838
TUT1	-1.05014	0.532779	0.0487162	0.679838
ANXA1	0.595019	0.303862	0.0502077	0.680243
BCORL1	1.14303	0.584291	0.0504345	0.680243
C1orf21	-0.598278	0.303949	0.0490275	0.680243
CDH4	-1.25826	0.640958	0.0496361	0.680243
CHN2	0.989354	0.506288	0.0506854	0.680243
DLGAP5	1.35573	0.691782	0.0500233	0.680243
DR1	0.586318	0.299874	0.0505576	0.680243
FAM134A	-0.535352	0.272247	0.0492502	0.680243

## Sheet: GMP
gene	Log2_FoldChange	lfcSE	pvalue	padj
EPB42	3.45796	0.921244	0.000174333	0.516992
MX2	1.3824	0.369848	0.000185677	0.516992
S100A11	1.19966	0.319644	0.000174653	0.516992
SLC48A1	2.07914	0.563028	0.000221814	0.516992
AHSP	2.04264	0.625671	0.00109573	0.566534
BLVRB	1.55961	0.472655	0.000967958	0.566534
CA1	2.57597	0.764345	0.000751239	0.566534
CAST	1.53136	0.453245	0.000728413	0.566534
CD101	2.74468	0.864015	0.00148981	0.566534
CXCL12	2.89998	0.879076	0.000970641	0.566534
GLRX5	0.814443	0.236039	0.000559631	0.566534
GPT2	-1.45216	0.456428	0.00146477	0.566534
HBA1	1.59037	0.496624	0.00136304	0.566534
LGALS3	1.9101	0.582053	0.001032	0.566534
MAD2L2	-0.73788	0.221461	0.000862621	0.566534
PABPC1L	-1.30897	0.412796	0.00151918	0.566534
PARP8	1.3699	0.407113	0.00076569	0.566534
PHLPP1	-0.969398	0.295825	0.00104942	0.566534
PTAFR	1.80936	0.530414	0.000646738	0.566534
RTN1	2.0254	0.618826	0.00106424	0.566534
TFE3	1.28836	0.395792	0.0011333	0.566534
THBS1	1.97151	0.619578	0.00146248	0.566534
TRIB1	1.87072	0.588014	0.00146556	0.566534
VEGFA	2.43416	0.751538	0.0011999	0.566534
XAF1	1.68397	0.520343	0.00121098	0.566534
ANK1	2.06823	0.671264	0.00206234	0.588116
APOC1	2.37599	0.790298	0.00264322	0.588116
ARHGEF1	0.953581	0.316607	0.00259639	0.588116
ATP1B2	2.66651	0.893791	0.00285097	0.588116
ATP6V0C	0.470455	0.155502	0.00248315	0.588116
CFD	2.05108	0.691137	0.00300054	0.588116
FCER2	2.45452	0.807637	0.00237261	0.588116
FES	1.49171	0.499753	0.00283675	0.588116
GLRX	1.20401	0.385782	0.0018026	0.588116
HEG1	1.61186	0.53493	0.00258498	0.588116
IFI6	2.08042	0.690114	0.00257321	0.588116
MTHFR	1.36743	0.437635	0.00178048	0.588116
NT5DC1	-0.822201	0.263779	0.00182697	0.588116
OAF	1.49639	0.481614	0.00188982	0.588116
OAS1	1.50761	0.493192	0.00223687	0.588116
PDE7A	-0.771908	0.25753	0.00272331	0.588116
PSAP	1.24788	0.406982	0.00216813	0.588116
PXN	1.54091	0.511123	0.0025719	0.588116
RCL1	1.31913	0.44253	0.00287411	0.588116
RHAG	2.50533	0.843506	0.00297667	0.588116
SOD2	1.22766	0.414066	0.00302795	0.588116
UROD	1.21812	0.404737	0.00261548	0.588116
ZWILCH	-0.963217	0.315615	0.00227419	0.588116
C5AR1	1.88729	0.641585	0.00326525	0.589553
GPBAR1	2.5671	0.868726	0.00312651	0.589553
IFITM3	1.95011	0.661694	0.00320724	0.589553
SAT1	0.972103	0.330713	0.00328829	0.589553
C10orf32	1.06437	0.375623	0.00460231	0.679272
CLEC7A	1.96982	0.685049	0.00403459	0.679272
FTH1	0.585865	0.205436	0.0043471	0.679272
G0S2	1.8957	0.66907	0.00460641	0.679272
HBB	1.69453	0.591648	0.00418209	0.679272
ITGAM	1.48849	0.524647	0.00455221	0.679272
MGAT4B	1.17032	0.411929	0.00449616	0.679272
MT-RNR2	0.588487	0.206558	0.0043854	0.679272
PNPLA4	1.52663	0.539554	0.00466303	0.679272
SDCBP	0.835072	0.294396	0.00456029	0.679272
SLC22A15	2.01201	0.703664	0.00424528	0.679272
UBASH3B	-1.21178	0.421653	0.0040546	0.679272
ITGB2-AS1	1.90571	0.675717	0.00479825	0.688216
PADI4	1.2992	0.463604	0.00507253	0.716534
ALAS2	1.96835	0.70782	0.00542139	0.754382
CRISPLD2	1.93756	0.698721	0.00555401	0.761472
SGTB	1.47515	0.532937	0.00564092	0.762178
FAM179B	-1.10559	0.40277	0.00605181	0.783625
MTF2	-0.532012	0.193552	0.00598363	0.783625
TSHZ3	2.53701	0.923691	0.00602167	0.783625
MAP4K4	0.807855	0.295615	0.00627991	0.791183
SERPINA1	1.8296	0.669083	0.00624789	0.791183
CHST15	2.1244	0.785974	0.0068739	0.836285
DNAJB14	-1.42428	0.528097	0.0069967	0.836285
POLR3F	-1.12057	0.414951	0.00692382	0.836285
TCF3	-0.617352	0.22884	0.00698121	0.836285
CD86	1.10366	0.414763	0.00779241	0.88596
FGR	1.0801	0.405693	0.00775966	0.88596
FLT3	-1.01389	0.380437	0.00769736	0.88596
PFKP	-0.917494	0.343251	0.0075186	0.88596
RASSF4	2.12994	0.801849	0.00790079	0.887459
ACOT13	1.10531	0.480819	0.0215159	0.902084
AGPAT3	0.869589	0.340723	0.0107048	0.902084
AGTRAP	1.35329	0.528122	0.0103933	0.902084
AHSA1	1.35439	0.571303	0.0177541	0.902084
ANKRD65	-1.84596	0.789389	0.0193631	0.902084
APOL6	1.45811	0.584236	0.0125691	0.902084
ARSB	-0.78418	0.334449	0.0190427	0.902084
BCL2L11	1.39999	0.533748	0.00871755	0.902084
BRI3	0.823882	0.333864	0.0135977	0.902084
BTN3A2	1.30193	0.553848	0.018738	0.902084
C16orf72	0.577502	0.240746	0.0164489	0.902084
C1orf122	1.00854	0.43007	0.0190234	0.902084
C2orf42	1.28881	0.543376	0.0176988	0.902084
CAMK1	1.6604	0.701739	0.0179752	0.902084
CAPN7	-0.971276	0.422848	0.0216195	0.902084
CASP1	1.09669	0.456673	0.0163287	0.902084
CASP2	-0.56893	0.245837	0.0206537	0.902084
CD109	-1.16305	0.459114	0.0113013	0.902084
CD300LF	1.33442	0.556909	0.0165701	0.902084
CD36	0.896922	0.384078	0.01953	0.902084
CD3D	1.75251	0.706847	0.0131627	0.902084
CD3EAP	-0.719542	0.310185	0.0203561	0.902084
CD58	1.14166	0.465235	0.0141297	0.902084
CECR1	1.01881	0.396636	0.0102101	0.902084
CHST2	1.5161	0.612624	0.0133322	0.902084
CKAP4	1.6768	0.725468	0.0208144	0.902084
CLU	1.3714	0.583437	0.0187452	0.902084
COMMD9	0.567166	0.232669	0.0147832	0.902084
CSPP1	-0.898581	0.38113	0.0183898	0.902084
CST7	1.40326	0.598355	0.0190169	0.902084
CTSD	1.03981	0.449473	0.0207004	0.902084
CXCL16	1.80208	0.743612	0.0153752	0.902084
CYP2U1	-1.32502	0.540192	0.014172	0.902084
DCTN5	1.17563	0.515017	0.0224481	0.902084
DDX6	1.02204	0.440561	0.020348	0.902084
DEF8	1.48001	0.576728	0.0102816	0.902084
DNTT	-0.946802	0.405018	0.0194038	0.902084
DOK2	2.09262	0.907315	0.0210886	0.902084
EMC10	0.928398	0.354057	0.00873714	0.902084
ENTPD1	1.29271	0.525678	0.0139278	0.902084
EPB49	1.97942	0.789887	0.0122123	0.902084
EPOR	2.29117	0.995943	0.0214199	0.902084
EPSTI1	1.83903	0.768153	0.0166613	0.902084
F5	1.52765	0.617902	0.0134243	0.902084
FAM172A	-1.28858	0.527059	0.0144914	0.902084
FAM213B	0.977788	0.395589	0.0134462	0.902084
FBXO18	0.708075	0.306732	0.0209741	0.902084
FCER1G	0.67156	0.287304	0.0194156	0.902084
FCN1	1.53256	0.642471	0.0170599	0.902084
FCRL6	1.43264	0.625957	0.0220957	0.902084
FGL2	0.892438	0.342492	0.00916809	0.902084
FHL1	-0.870573	0.346214	0.0119183	0.902084
FKBP4	0.898565	0.37316	0.0160406	0.902084
FTL	0.729428	0.286016	0.0107629	0.902084
FURIN	1.35328	0.517383	0.00890649	0.902084
GIMAP1	1.9808	0.768136	0.00991707	0.902084
GPSM3	0.809714	0.340904	0.0175397	0.902084
GRN	0.542995	0.234523	0.0205954	0.902084
GYPC	0.831878	0.346549	0.0163743	0.902084
GZMK	2.54617	1.0273	0.0131932	0.902084
HBEGF	1.76391	0.730677	0.0157753	0.902084
HDGFRP3	-0.890026	0.367582	0.0154652	0.902084
HLA-C	0.728927	0.294221	0.0132313	0.902084
HN1	0.447858	0.189933	0.0183746	0.902084
HPS4	-0.630793	0.274223	0.0214315	0.902084
ICAM4	2.19294	0.919634	0.0170989	0.902084
IDH3A	-0.567879	0.246901	0.0214468	0.902084
IFI30	1.16905	0.451851	0.00967464	0.902084
IGFBP7	-0.488859	0.213839	0.0222477	0.902084
IL1RN	1.07328	0.43604	0.0138385	0.902084
KCNA5	-1.25169	0.545379	0.0217288	0.902084
KCNE3	1.6924	0.738049	0.0218439	0.902084
KIAA2018	0.874415	0.374489	0.0195458	0.902084
KIN	0.778411	0.320275	0.0150802	0.902084
LGALS2	2.4787	0.971161	0.0107011	0.902084
LHPP	1.36339	0.533993	0.0106741	0.902084
LILRA3	1.93592	0.789805	0.0142407	0.902084
LILRA6	1.7736	0.752263	0.0183892	0.902084
LMNA	1.70195	0.744802	0.0223064	0.902084
MAB21L3	1.26306	0.504323	0.0122635	0.902084
MAFB	2.16676	0.910028	0.0172663	0.902084
MAN2B1	0.570261	0.224884	0.011219	0.902084
43526	0.937262	0.409515	0.0220963	0.902084
MEGF9	1.10128	0.474454	0.0202784	0.902084
MID1IP1	0.780743	0.326413	0.0167619	0.902084
MPP1	0.552162	0.232149	0.0173839	0.902084
MRPL20	0.530074	0.221244	0.0165805	0.902084
MSRB1	1.20562	0.502877	0.01651	0.902084
MT-ATP8	0.584227	0.231469	0.0116028	0.902084
MT-ND1	0.730545	0.305269	0.016706	0.902084
MT-ND2	0.738962	0.2929	0.0116386	0.902084
MT-ND4	0.582506	0.248958	0.0192952	0.902084
MT-RNR1	0.543627	0.226934	0.0165963	0.902084
MTRF1L	0.859564	0.373388	0.0213313	0.902084
MTSS1	2.46513	0.93806	0.00859138	0.902084
NAV1	-1.0236	0.43035	0.0173822	0.902084
NMNAT3	1.78857	0.677044	0.0082481	0.902084
NUDT19	0.856747	0.362617	0.0181435	0.902084
NUDT4	1.51349	0.594252	0.0108693	0.902084
OSBP2	2.2836	0.93422	0.0145097	0.902084
PEA15	0.764092	0.31793	0.0162464	0.902084
PELI1	1.16412	0.502837	0.0206067	0.902084
PIGL	1.97858	0.849474	0.0198494	0.902084
PIGX	-0.943024	0.366768	0.0101354	0.902084
PIP5K1B	1.55348	0.61529	0.0115763	0.902084
PITPNC1	0.883452	0.386539	0.022281	0.902084
PLEKHM1	1.34257	0.564285	0.0173482	0.902084
PMM2	1.63659	0.711232	0.0213885	0.902084
PNKD	0.846093	0.359566	0.018618	0.902084
PQLC1	0.908246	0.349163	0.00928954	0.902084
PRF1	1.58387	0.691484	0.0219905	0.902084
PRR5	2.29125	0.934846	0.0142487	0.902084
PVT1	2.16611	0.930794	0.0199563	0.902084
RAB11FIP2	-1.13526	0.481126	0.0182954	0.902084
RASSF3	1.0825	0.426624	0.0111694	0.902084
RBM38	1.42059	0.576983	0.0138127	0.902084
RNF2	0.789759	0.300279	0.00853632	0.902084
RPL26	-0.247718	0.103647	0.0168474	0.902084
RPS25	-0.281788	0.116981	0.0160037	0.902084
S100A12	1.60151	0.638197	0.0120926	0.902084
S100A4	0.592961	0.259727	0.0224292	0.902084
S100A8	1.5713	0.653462	0.0161912	0.902084
SAMSN1	1.20805	0.523749	0.0210808	0.902084
SCIMP	1.98315	0.806755	0.0139641	0.902084
SECTM1	2.24234	0.913212	0.0140709	0.902084
SETD2	-0.557522	0.236836	0.0185706	0.902084
SHCBP1	-0.900116	0.381978	0.0184502	0.902084
SIAH2	0.652519	0.257298	0.0112114	0.902084
SLC16A3	1.32777	0.558687	0.0174737	0.902084
SLC2A3	1.42451	0.550348	0.00964281	0.902084
SNAPC2	0.996765	0.401263	0.0129891	0.902084
SNX27	0.81948	0.34829	0.0186293	0.902084
SPINK2	-1.05714	0.420615	0.0119601	0.902084
SS18L1	-0.949245	0.37843	0.0121288	0.902084
STEAP4	2.29287	0.966318	0.0176545	0.902084
STRADA	-0.602958	0.250453	0.0160636	0.902084
STX11	1.21433	0.521307	0.0198385	0.902084
STXBP2	0.835323	0.321914	0.00946277	0.902084
TCF19	-0.732468	0.302545	0.015477	0.902084
TGFB1	1.21032	0.501101	0.0157217	0.902084
TIFA	-0.798685	0.318644	0.0121931	0.902084
TK1	-0.572109	0.223052	0.0103201	0.902084
TMEM176B	1.64991	0.665047	0.0131052	0.902084
TMEM71	0.700703	0.277316	0.0115131	0.902084
TRIM58	1.14657	0.447003	0.0103171	0.902084
TYROBP	0.897702	0.365366	0.0140106	0.902084
ZNF525	-1.6755	0.691021	0.0153223	0.902084
ZNF584	-1.76014	0.731599	0.0161339	0.902084
ZNF621	-0.8596	0.358628	0.0165339	0.902084
ZMAT2	0.454095	0.199345	0.0227306	0.909516
C20orf194	1.61249	0.709855	0.0231121	0.920541
NFKBIA	0.679849	0.299484	0.0232036	0.920541
INPP5D	0.408493	0.180081	0.0233062	0.920693
ACADVL	-0.7157	0.317725	0.0242856	0.923671
BDH2	-0.79408	0.354426	0.0250608	0.923671
C17orf53	-1.45274	0.643443	0.0239602	0.923671
CLEC4G	-1.83961	0.823169	0.0254309	0.923671
GTPBP8	-1.38709	0.615471	0.0242144	0.923671
HSPBAP1	-1.00168	0.448571	0.0255452	0.923671
IMP4	0.620364	0.273896	0.023515	0.923671
LEPRE1	-1.27178	0.570825	0.0258826	0.923671
LOC100289092	-1.66964	0.746241	0.0252601	0.923671
LSM3	-0.400483	0.179446	0.0256297	0.923671
LYAR	0.759799	0.3412	0.0259575	0.923671
MTFMT	1.24524	0.558771	0.0258451	0.923671
MX1	1.13064	0.501231	0.0240879	0.923671
NDFIP1	0.732403	0.326314	0.0248018	0.923671
PCTP	1.68432	0.748633	0.0244578	0.923671
PDLIM5	0.793673	0.351689	0.0240237	0.923671
PISD	1.47335	0.660218	0.0256408	0.923671
PTK7	-1.37019	0.607091	0.0240099	0.923671
S100A9	1.50704	0.675618	0.0257069	0.923671
SPG21	0.561136	0.248203	0.023772	0.923671
STAT1	0.603062	0.268933	0.0249341	0.923671
STK38	1.00865	0.449947	0.0249808	0.923671
TFDP2	-0.855793	0.378252	0.0236669	0.923671
TLE1	2.02641	0.903385	0.0248888	0.923671
TMIGD2	-1.10486	0.492911	0.0249936	0.923671
UFM1	0.422953	0.188909	0.0251609	0.923671
CD7	1.59409	0.717754	0.0263548	0.92437
HSPA1A	0.838221	0.377241	0.0262849	0.92437
KCNH2	2.46971	1.1105	0.0261509	0.92437
MSH6	-0.798551	0.359837	0.0264729	0.92437
NAPSB	-0.556694	0.250816	0.0264503	0.92437
LYZ	0.691149	0.311886	0.0266891	0.928442
AGPAT9	1.31914	0.597409	0.0272376	0.929035
FAM222B	-1.03076	0.466512	0.0271397	0.929035
FLJ31306	0.954006	0.432371	0.0273524	0.929035
GYPB	1.70154	0.770838	0.0272869	0.929035
MICAL2	0.788737	0.356984	0.0271435	0.929035
MT-TV	1.41297	0.640281	0.0273283	0.929035
SLC9A7	-0.634116	0.287487	0.0274037	0.929035
CD4	0.824498	0.374184	0.0275626	0.929969
NCSTN	0.606441	0.275872	0.02793	0.929969
PFDN5	0.599109	0.272501	0.0279093	0.929969
TADA2B	1.13574	0.516079	0.0277566	0.929969
TATDN1	-1.23791	0.562785	0.0278348	0.929969
ACSL4	0.55959	0.294067	0.0570493	0.930711
ACY3	-1.06897	0.539014	0.0473464	0.930711
ACYP1	-0.852718	0.431492	0.0481313	0.930711
AGA	-0.782197	0.385948	0.0426942	0.930711
AHNAK	0.516087	0.254575	0.042637	0.930711
AMT	1.61642	0.777882	0.0377116	0.930711
ANAPC16	0.373239	0.185213	0.0438853	0.930711
ANKH	0.82074	0.416702	0.0488834	0.930711
ANPEP	1.80296	0.950387	0.0578171	0.930711
AOAH	1.47618	0.709694	0.0375229	0.930711
APLP2	0.583466	0.29966	0.0515234	0.930711
APOOL	-0.747782	0.364466	0.0401968	0.930711
ASAH1	0.839354	0.419058	0.0451823	0.930711
ASGR1	1.97025	0.969976	0.0422313	0.930711
ATF7IP	0.854192	0.404139	0.0345489	0.930711
ATG9A	1.18963	0.598504	0.0468484	0.930711
ATP13A2	0.808251	0.426624	0.0581553	0.930711
ATP6AP2	0.452121	0.227854	0.0472267	0.930711
BCL2A1	1.60932	0.796783	0.0434073	0.930711
BIVM	-0.876757	0.452574	0.052713	0.930711
BLVRA	1.08562	0.512136	0.0340245	0.930711
BNIP3L	0.69397	0.320466	0.0303493	0.930711
BNIP3	1.38654	0.674943	0.0399459	0.930711
BZRAP1-AS1	-0.927799	0.451889	0.0400572	0.930711
C19orf43	0.44574	0.207072	0.031351	0.930711
C19orf77	-0.707338	0.337334	0.0360072	0.930711
C1orf198	0.902508	0.451939	0.0458285	0.930711
C1orf27	-0.96564	0.446456	0.0305488	0.930711
CACNA2D3	-0.80342	0.368269	0.0291379	0.930711
CAMKK2	0.588823	0.284574	0.0385328	0.930711
CARD16	1.48234	0.732822	0.0430959	0.930711
CASK	-1.23569	0.615837	0.0448004	0.930711
CBR4	1.33774	0.639808	0.0365423	0.930711
CCNT2	-0.741859	0.378569	0.0500377	0.930711
CCR1	0.839151	0.392608	0.0325674	0.930711
CCR2	0.766814	0.403645	0.0574696	0.930711
CD247	1.82912	0.843402	0.030102	0.930711
CD300E	1.42174	0.674884	0.0351483	0.930711
CD33	0.978277	0.504445	0.0524631	0.930711
CD55	0.751682	0.383292	0.0498651	0.930711
CD93	0.820768	0.392617	0.0365726	0.930711
CDC42	0.405976	0.192087	0.0345578	0.930711
CDKN1A	0.877975	0.440254	0.0461249	0.930711
CEBPB	1.31248	0.660587	0.0469396	0.930711
CENPQ	-1.07836	0.564413	0.056058	0.930711
CES1	1.50348	0.720296	0.0368606	0.930711
CHMP4A	0.69951	0.358284	0.0508919	0.930711
CITED2	0.767124	0.383632	0.0455396	0.930711
CLK4	0.956937	0.484628	0.048316	0.930711
CNEP1R1	1.58403	0.794054	0.0460582	0.930711
CNOT6	-0.54871	0.27768	0.0481483	0.930711
COG6	-0.958614	0.447431	0.0321546	0.930711
CPM	1.21921	0.560555	0.0296298	0.930711
CPSF1	0.545672	0.267375	0.0412656	0.930711
CSF3R	0.914692	0.424518	0.0311884	0.930711
CSNK1G1	-0.701551	0.355245	0.0482866	0.930711
CSRP1	0.491441	0.231854	0.0340387	0.930711
CSTA	0.879583	0.408646	0.0313634	0.930711
CTSS	1.013	0.474525	0.03278	0.930711
CTSZ	1.36647	0.717548	0.0568624	0.930711
CX3CR1	1.16734	0.601005	0.0520985	0.930711
CYP1B1	1.70612	0.839137	0.0420342	0.930711
DACH1	-0.846894	0.438721	0.0535611	0.930711
DAZAP2	0.385594	0.200776	0.0547923	0.930711
DCAF11	1.0594	0.559866	0.058459	0.930711
DEDD2	0.914736	0.464738	0.0490355	0.930711
DLC1	1.79517	0.889888	0.0436647	0.930711
DMTF1	-0.625733	0.324167	0.0535721	0.930711
DNAJB6	0.563638	0.263966	0.0327391	0.930711
DR1	-0.555298	0.276416	0.0445452	0.930711
DTWD2	-1.10764	0.546069	0.0425214	0.930711
DYSF	1.55877	0.730293	0.0328066	0.930711
EID1	-0.329418	0.156973	0.0358557	0.930711
EPB41L3	0.994432	0.522113	0.0568282	0.930711
EVI2B	0.463597	0.228609	0.0425703	0.930711
EXPH5	-1.62475	0.809114	0.0446373	0.930711
FAM118A	1.12544	0.545151	0.0389748	0.930711
FAM129A	-0.737949	0.353331	0.0367485	0.930711
FAM20B	-1.04398	0.500879	0.0371341	0.930711
FAM210B	1.07721	0.506673	0.0334995	0.930711
FAM8A1	1.16464	0.565442	0.0394269	0.930711
FBXO46	0.745187	0.384548	0.0526445	0.930711
FCHSD2	-0.571114	0.288186	0.0475069	0.930711
FECH	0.811073	0.397951	0.0415376	0.930711
FHL2	1.53403	0.799244	0.0549396	0.930711
FLYWCH1	1.45275	0.726515	0.0455422	0.930711
FNDC3B	0.922999	0.447691	0.0392376	0.930711
FOXRED2	-0.564748	0.262274	0.0312969	0.930711
FPGT	1.39744	0.640411	0.0291023	0.930711
FYB	0.658799	0.339632	0.052411	0.930711
GBP4	0.962141	0.455992	0.0348586	0.930711
GIMAP4	1.61004	0.754418	0.0328304	0.930711
GIMAP6	1.45566	0.702688	0.038306	0.930711
GINS2	-0.518117	0.26698	0.0522993	0.930711
GNAI3	0.429052	0.196297	0.0288358	0.930711
GNAS	-0.284443	0.141236	0.0440139	0.930711
GNLY	1.21184	0.574505	0.034913	0.930711
GNPDA1	1.10306	0.558559	0.0482865	0.930711
GOLGA8S	-0.567926	0.271322	0.0363334	0.930711
GSDMD	1.58065	0.72781	0.0298721	0.930711
GSTM4	-0.802246	0.37962	0.0345762	0.930711
GTF3C1	0.828079	0.425153	0.0514484	0.930711
H2AFY	-0.277286	0.137074	0.043084	0.930711
HBA2	0.631316	0.323945	0.0513153	0.930711
HECA	0.674591	0.347947	0.0525283	0.930711
HELZ2	1.57516	0.77562	0.0422706	0.930711
HLA-DOA	-0.94835	0.440545	0.0313445	0.930711
HLA-DOB	0.865326	0.440078	0.0492636	0.930711
HLA-E	0.594186	0.311246	0.0562551	0.930711
HMBS	0.859475	0.414867	0.0382946	0.930711
HSPB11	-0.550858	0.260044	0.0341471	0.930711
IFIH1	1.61432	0.779026	0.0382444	0.930711
IGF2R	0.907753	0.479246	0.0582081	0.930711
IGLL5	0.667513	0.314023	0.0335297	0.930711
IKZF3	1.52718	0.711425	0.031821	0.930711
IL18R1	-0.935635	0.443517	0.0348946	0.930711
IPCEF1	1.59956	0.834773	0.0553448	0.930711
ITK	1.33862	0.645676	0.0381527	0.930711
ITM2C	-0.513124	0.23976	0.032342	0.930711
JDP2	2.23726	1.17174	0.0562161	0.930711
JHDM1D	1.18408	0.60263	0.0494314	0.930711
KIAA0922	0.789001	0.390984	0.0435924	0.930711
KIAA1551	0.769736	0.370607	0.0378055	0.930711
KIF3B	1.17527	0.566782	0.0381185	0.930711
KLF13	0.429902	0.215013	0.0455625	0.930711
KLHL36	1.25079	0.643839	0.0520515	0.930711
KPNA4	0.643257	0.319526	0.0440979	0.930711
LAPTM5	0.538579	0.284307	0.0581776	0.930711
LEPROT	0.533463	0.255055	0.0364777	0.930711
LILRA4	-0.961293	0.502601	0.0557948	0.930711
LINC00263	-1.33279	0.608014	0.0283762	0.930711
LOC152217	0.472491	0.248983	0.057738	0.930711
LOC400657	-1.41282	0.697686	0.0428662	0.930711
LOC401397	-0.637227	0.325024	0.0499314	0.930711
LOC541471	1.59077	0.759202	0.0361428	0.930711
LONRF1	-0.79213	0.402088	0.0488334	0.930711
LPAR6	1.28296	0.67694	0.0580622	0.930711
LPCAT3	0.580836	0.306073	0.0577354	0.930711
LRG1	1.51276	0.709118	0.0329005	0.930711
LRP5	1.59926	0.832634	0.054767	0.930711
LRP8	-1.15122	0.588453	0.0504238	0.930711
LST1	0.610547	0.318839	0.0555039	0.930711
LTC4S	-1.2396	0.628767	0.0486692	0.930711
LY96	0.98532	0.476278	0.0385659	0.930711
LYL1	0.755121	0.371453	0.0420644	0.930711
MAP3K3	1.02796	0.468203	0.0281251	0.930711
43525	1.00158	0.50672	0.048088	0.930711
MAT2B	0.489596	0.224834	0.0294369	0.930711
MCTP2	1.52085	0.734406	0.038372	0.930711
MEF2D	-0.395483	0.195091	0.0426448	0.930711
MEFV	1.54566	0.79486	0.0518275	0.930711
MGLL	-0.863086	0.42236	0.0410046	0.930711
MGST1	0.767445	0.354738	0.0305096	0.930711
MIDN	0.604419	0.298875	0.0431436	0.930711
MINPP1	1.01233	0.533038	0.0575411	0.930711
MIR22HG	1.38746	0.697508	0.0466828	0.930711
MKNK1	0.678518	0.345665	0.0496535	0.930711
MNDA	1.21593	0.595221	0.0410703	0.930711
MOCS3	1.00069	0.462995	0.0306695	0.930711
MRPL14	0.583802	0.281633	0.0381799	0.930711
MRPS28	-1.17391	0.608405	0.0536697	0.930711
MS4A6A	0.957218	0.493934	0.0526296	0.930711
MST4	-0.431361	0.205755	0.0360403	0.930711
MT-CO2	0.516469	0.263367	0.0498765	0.930711
MT-CO3	0.578459	0.284463	0.0420011	0.930711
MT-ND3	0.697566	0.331688	0.0354587	0.930711
MT-TM	0.639397	0.322613	0.0474867	0.930711
MTMR3	1.10784	0.58196	0.0569583	0.930711
MYCBP2	0.686582	0.355555	0.0534811	0.930711
N4BP2	-0.859192	0.435886	0.0487078	0.930711
NAB2	-1.2359	0.623289	0.0473829	0.930711
