# Supplementary material for: Reprogramming of bone marrow myeloid progenitor cells in patients with severe coronary artery disease
Source: eLife journal article supplement (doi:10.7554/elife.60939), 2020-11-09
Supplement: supp [file elife-60939-supp-v1.zip › elife_poa_e60939_Figure_6_source_data_2.xlsx]

## Sheet: enrichment_6
Cell.Dedirection	CellGroup	ID	Description	count_DE	BgRatio	pvalue	p.adjust	geneSymbol	GeneRatio
HSC.UP	HSC	GO:0043312	neutrophil degranulation	36	485/18493	7.87376e-19	1.49242e-15	CFD/ACTR2/PSMD6/ANXA2/AZU1/C3AR1/C6orf120/CD33/CD93/COTL1/CPPED1/CR1/CST3/CTSH/CTSS/FGL2/GNS/HVCN1/IGF2R/IQGAP1/LGALS3/MAN2B1/MNDA/MS4A3/OSTF1/PRKCD/PYGL/QPCT/RAB10/RAB31/RAB7A/S100A11/SERPINA1/SIRPA/TLR2/TNFRSF1B	0.165138
HSC.UP	HSC	GO:0002283	neutrophil activation involved in immune response	36	488/18493	9.62544e-19	1.49242e-15	CFD/ACTR2/PSMD6/ANXA2/AZU1/C3AR1/C6orf120/CD33/CD93/COTL1/CPPED1/CR1/CST3/CTSH/CTSS/FGL2/GNS/HVCN1/IGF2R/IQGAP1/LGALS3/MAN2B1/MNDA/MS4A3/OSTF1/PRKCD/PYGL/QPCT/RAB10/RAB31/RAB7A/S100A11/SERPINA1/SIRPA/TLR2/TNFRSF1B	0.165138
HSC.UP	HSC	GO:0042119	neutrophil activation	36	498/18493	1.86059e-18	1.53935e-15	CFD/ACTR2/PSMD6/ANXA2/AZU1/C3AR1/C6orf120/CD33/CD93/COTL1/CPPED1/CR1/CST3/CTSH/CTSS/FGL2/GNS/HVCN1/IGF2R/IQGAP1/LGALS3/MAN2B1/MNDA/MS4A3/OSTF1/PRKCD/PYGL/QPCT/RAB10/RAB31/RAB7A/S100A11/SERPINA1/SIRPA/TLR2/TNFRSF1B	0.165138
HSC.UP	HSC	GO:0002446	neutrophil mediated immunity	36	499/18493	1.98562e-18	1.53935e-15	CFD/ACTR2/PSMD6/ANXA2/AZU1/C3AR1/C6orf120/CD33/CD93/COTL1/CPPED1/CR1/CST3/CTSH/CTSS/FGL2/GNS/HVCN1/IGF2R/IQGAP1/LGALS3/MAN2B1/MNDA/MS4A3/OSTF1/PRKCD/PYGL/QPCT/RAB10/RAB31/RAB7A/S100A11/SERPINA1/SIRPA/TLR2/TNFRSF1B	0.165138
HSC.UP	HSC	GO:0042533	tumor necrosis factor biosynthetic process	6	20/18493	8.45859e-08	4.37168e-05	BCL3/AZU1/CCR2/LILRB1/TLR1/TLR4	0.0275229
HSC.UP	HSC	GO:0042534	regulation of tumor necrosis factor biosynthetic process	6	20/18493	8.45859e-08	4.37168e-05	BCL3/AZU1/CCR2/LILRB1/TLR1/TLR4	0.0275229
HSC.UP	HSC	GO:0042116	macrophage activation	9	80/18493	4.18582e-07	0.000185432	AZU1/CD93/DYSF/IL4R/LRRK2/TLR1/TLR2/TLR4/TLR7	0.0412844
HSC.UP	HSC	GO:0032680	regulation of tumor necrosis factor production	10	127/18493	2.65306e-06	0.000938387	BCL3/AZU1/CCR2/LILRB1/LRRK2/LY96/SIRPA/TLR1/TLR2/TLR4	0.0458716
HSC.UP	HSC	GO:0001819	positive regulation of cytokine production	18	422/18493	2.82328e-06	0.000938387	BCL3/AZU1/C3AR1/CCR2/CLEC4E/CSF1R/IL1RN/IL4R/LRRK2/LY96/MYD88/SCAMP5/SLAMF6/SULF2/TLR1/TLR2/TLR4/TLR7	0.0825688
HSC.UP	HSC	GO:0032640	tumor necrosis factor production	10	129/18493	3.05656e-06	0.000938387	BCL3/AZU1/CCR2/LILRB1/LRRK2/LY96/SIRPA/TLR1/TLR2/TLR4	0.0458716
HSC.UP	HSC	GO:1903555	regulation of tumor necrosis factor superfamily cytokine production	10	131/18493	3.51236e-06	0.000938387	BCL3/AZU1/CCR2/LILRB1/LRRK2/LY96/SIRPA/TLR1/TLR2/TLR4	0.0458716
HSC.UP	HSC	GO:0002755	MyD88-dependent toll-like receptor signaling pathway	6	36/18493	3.63129e-06	0.000938387	LY96/MYD88/TLR1/TLR2/TLR4/TLR7	0.0275229
HSC.UP	HSC	GO:0045806	negative regulation of endocytosis	7	56/18493	4.08051e-06	0.000973358	DYSF/LGALS3/LILRB1/SCAMP5/SIRPA/SNX33/TLR2	0.0321101
MPP.UP	MPP	GO:0061001	regulation of dendritic spine morphogenesis	7	40/18493	1.21411e-05	0.0360699	PTEN/SIPA1L1/TIAM1/DNM1L/LRRK2/BHLHB9/OPA1	0.0190736
MPP.UP	MPP	GO:0031124	mRNA 3'-end processing	10	95/18493	1.89493e-05	0.0360699	PAPOLG/WDR33/CTR9/SRRM1/MTPAP/CDC73/SARNP/THOC2/CCNT1/NCBP1	0.027248
GMP.UP	GMP	GO:0043312	neutrophil degranulation	21	485/18493	5.13696e-08	6.43946e-05	ATP6V0C/BCR/C5AR1/CANT1/CD58/CFD/CRISPLD2/FGL2/FGR/FTH1/GSDMD/LGALS3/LILRA3/MAN2B1/NCSTN/PSAP/PTAFR/RHOA/S100A11/SDCBP/SERPINA1	0.107143
GMP.UP	GMP	GO:0002283	neutrophil activation involved in immune response	21	488/18493	5.7035e-08	6.43946e-05	ATP6V0C/BCR/C5AR1/CANT1/CD58/CFD/CRISPLD2/FGL2/FGR/FTH1/GSDMD/LGALS3/LILRA3/MAN2B1/NCSTN/PSAP/PTAFR/RHOA/S100A11/SDCBP/SERPINA1	0.107143
GMP.UP	GMP	GO:0042119	neutrophil activation	21	498/18493	8.03552e-08	6.43946e-05	ATP6V0C/BCR/C5AR1/CANT1/CD58/CFD/CRISPLD2/FGL2/FGR/FTH1/GSDMD/LGALS3/LILRA3/MAN2B1/NCSTN/PSAP/PTAFR/RHOA/S100A11/SDCBP/SERPINA1	0.107143
GMP.UP	GMP	GO:0002446	neutrophil mediated immunity	21	499/18493	8.31166e-08	6.43946e-05	ATP6V0C/BCR/C5AR1/CANT1/CD58/CFD/CRISPLD2/FGL2/FGR/FTH1/GSDMD/LGALS3/LILRA3/MAN2B1/NCSTN/PSAP/PTAFR/RHOA/S100A11/SDCBP/SERPINA1	0.107143
GMP.UP	GMP	GO:0048872	homeostasis of number of cells	14	248/18493	4.26294e-07	0.000232968	AHSP/BCL2L11/BCR/CCR2/EPB42/FAM210B/INPP5D/MAFB/NCSTN/RHAG/TGFB1/TNFSF13B/TRIM58/VEGFA	0.0714286
GMP.UP	GMP	GO:0002262	myeloid cell homeostasis	11	146/18493	4.51051e-07	0.000232968	AHSP/BCL2L11/CCR2/EPB42/FAM210B/INPP5D/MAFB/NCSTN/RHAG/TRIM58/VEGFA	0.0561224
GMP.UP	GMP	GO:0002687	positive regulation of leukocyte migration	10	121/18493	6.48767e-07	0.000287219	C5AR1/CCR2/CXCL12/GPSM3/LGALS3/PTAFR/RHOA/TGFB1/THBS1/VEGFA	0.0510204
GMP.UP	GMP	GO:0030099	myeloid cell differentiation	17	405/18493	1.56881e-06	0.000607716	AHSP/CD101/EPB42/FAM210B/FES/INPP5D/LGALS3/MAFB/NOTCH2/RHAG/TFE3/TGFB1/THBS1/TNRC6A/TRIB1/TRIM58/VEGFA	0.0867347
GMP.UP	GMP	GO:0045637	regulation of myeloid cell differentiation	13	248/18493	2.54405e-06	0.000876001	CD101/FAM210B/FES/INPP5D/LGALS3/MAFB/NOTCH2/TFE3/TGFB1/THBS1/TNRC6A/TRIB1/TRIM58	0.0663265
GMP.UP	GMP	GO:0002685	regulation of leukocyte migration	11	180/18493	3.55637e-06	0.00110212	BCR/C5AR1/CCR2/CXCL12/GPSM3/LGALS3/PTAFR/RHOA/TGFB1/THBS1/VEGFA	0.0561224
GMP.UP	GMP	GO:0043300	regulation of leukocyte degranulation	6	42/18493	5.01312e-06	0.00129464	BCR/CCR2/FES/FGR/PDPK1/PTAFR	0.0306122
GMP.UP	GMP	GO:0071675	regulation of mononuclear cell migration	6	42/18493	5.01312e-06	0.00129464	C5AR1/CCR2/CXCL12/LGALS3/TGFB1/THBS1	0.0306122
GMP.UP	GMP	GO:1903706	regulation of hemopoiesis	16	418/18493	1.03038e-05	0.00245626	CD101/CD86/FAM210B/FES/IKZF3/INPP5D/LGALS3/MAFB/NOTCH2/RHOA/TFE3/TGFB1/THBS1/TNRC6A/TRIB1/TRIM58	0.0816327
GMP.DOWN	GMP	GO:0010839	negative regulation of keratinocyte proliferation	3	13/18493	2.16098e-05	0.0368043	CASK/CD109/VDR	0.0375
GMP.DOWN	GMP	GO:0042772	DNA damage response, signal transduction resulting in transcription	3	16/18493	4.19184e-05	0.0368043	ING4/MAD2L2/RPL26	0.0375
