# Supplementary figures and images for: Reprogramming of bone marrow myeloid progenitor cells in patients with severe coronary artery disease
Source: eLife journal article supplement (doi:10.7554/elife.60939), 2020-11-09

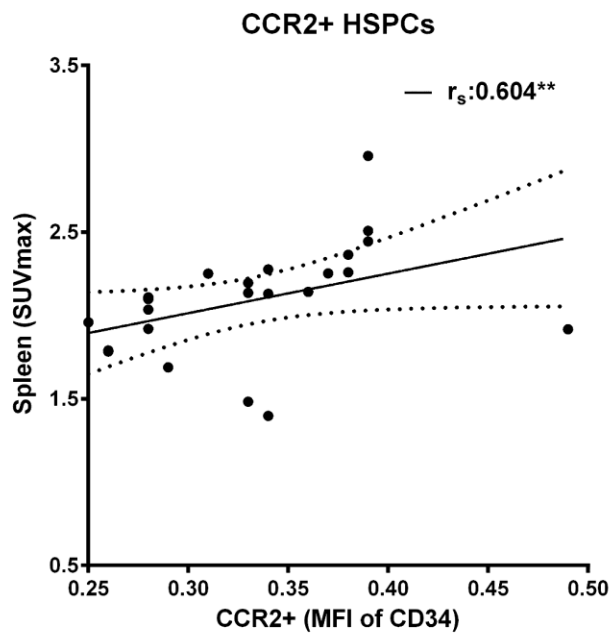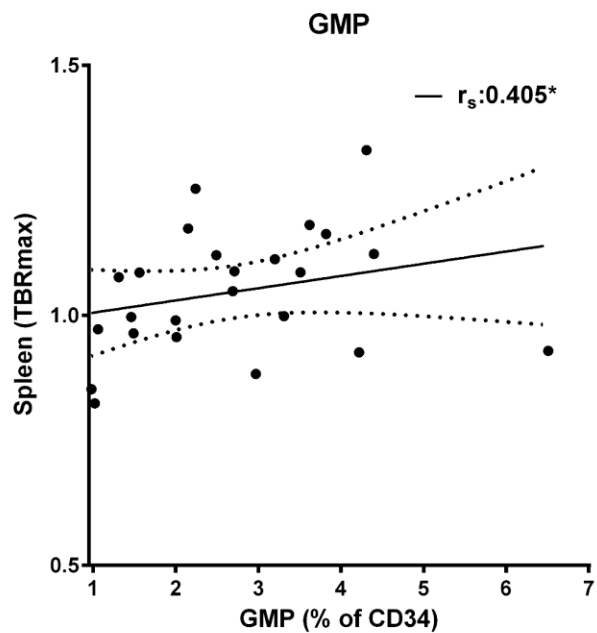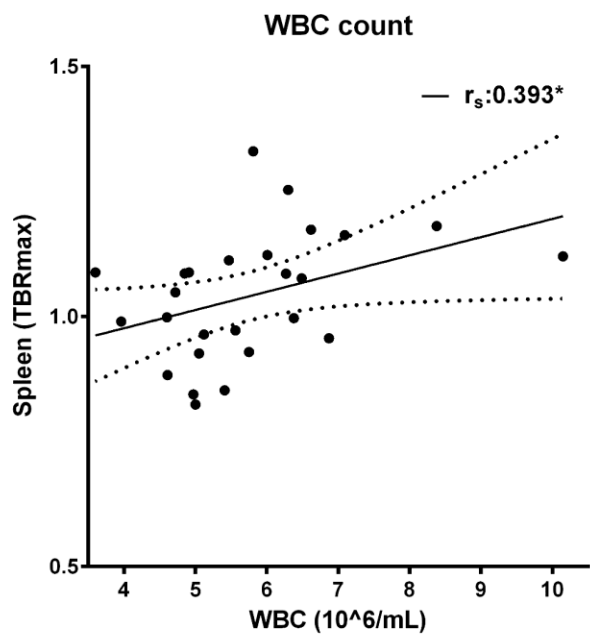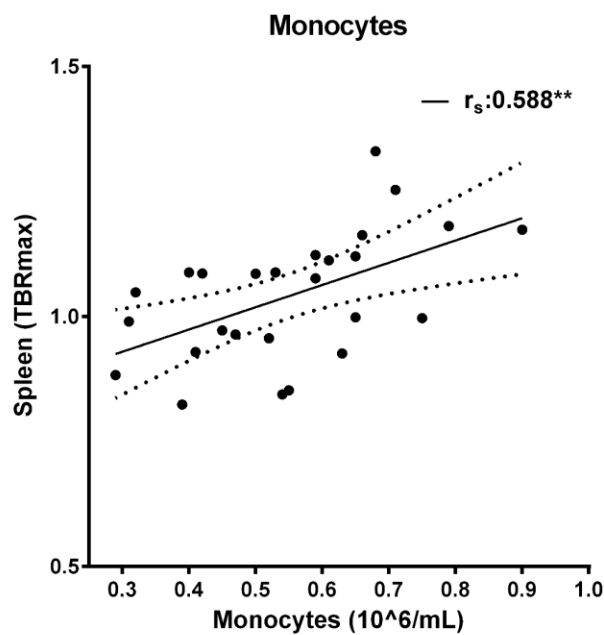

Supplement: supp [file elife-60939-supp-v1.zip]

HSC

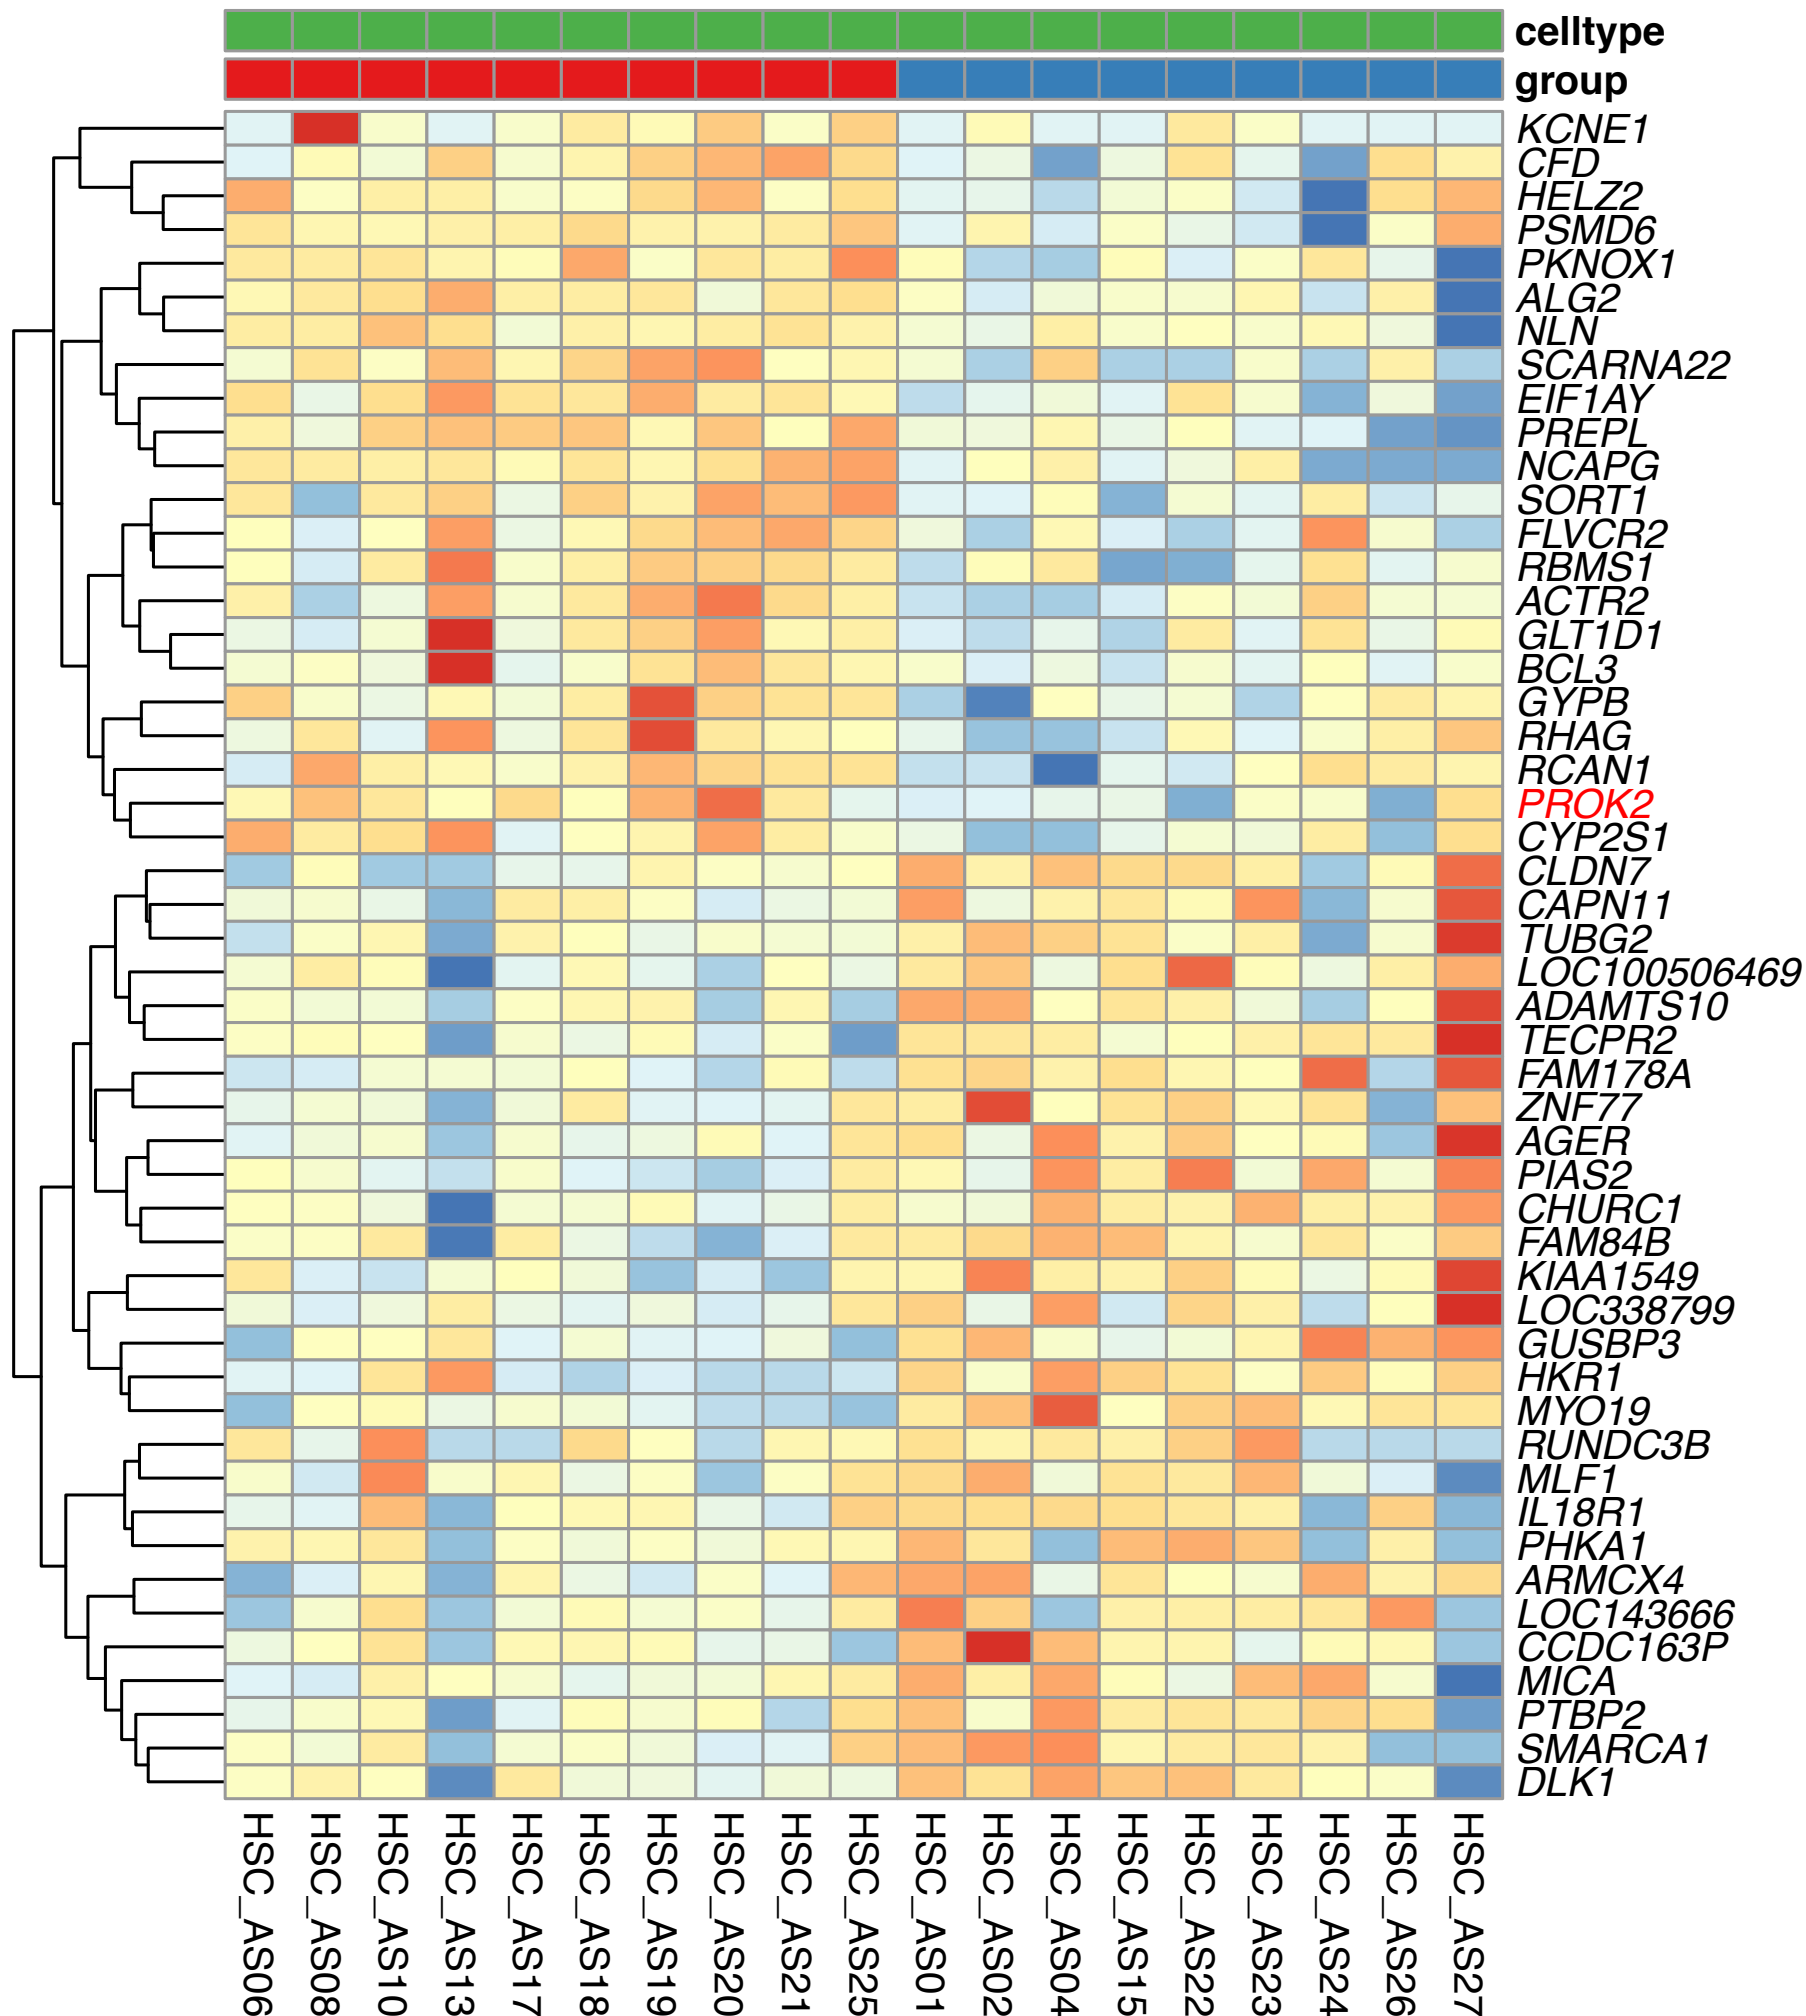

GMP

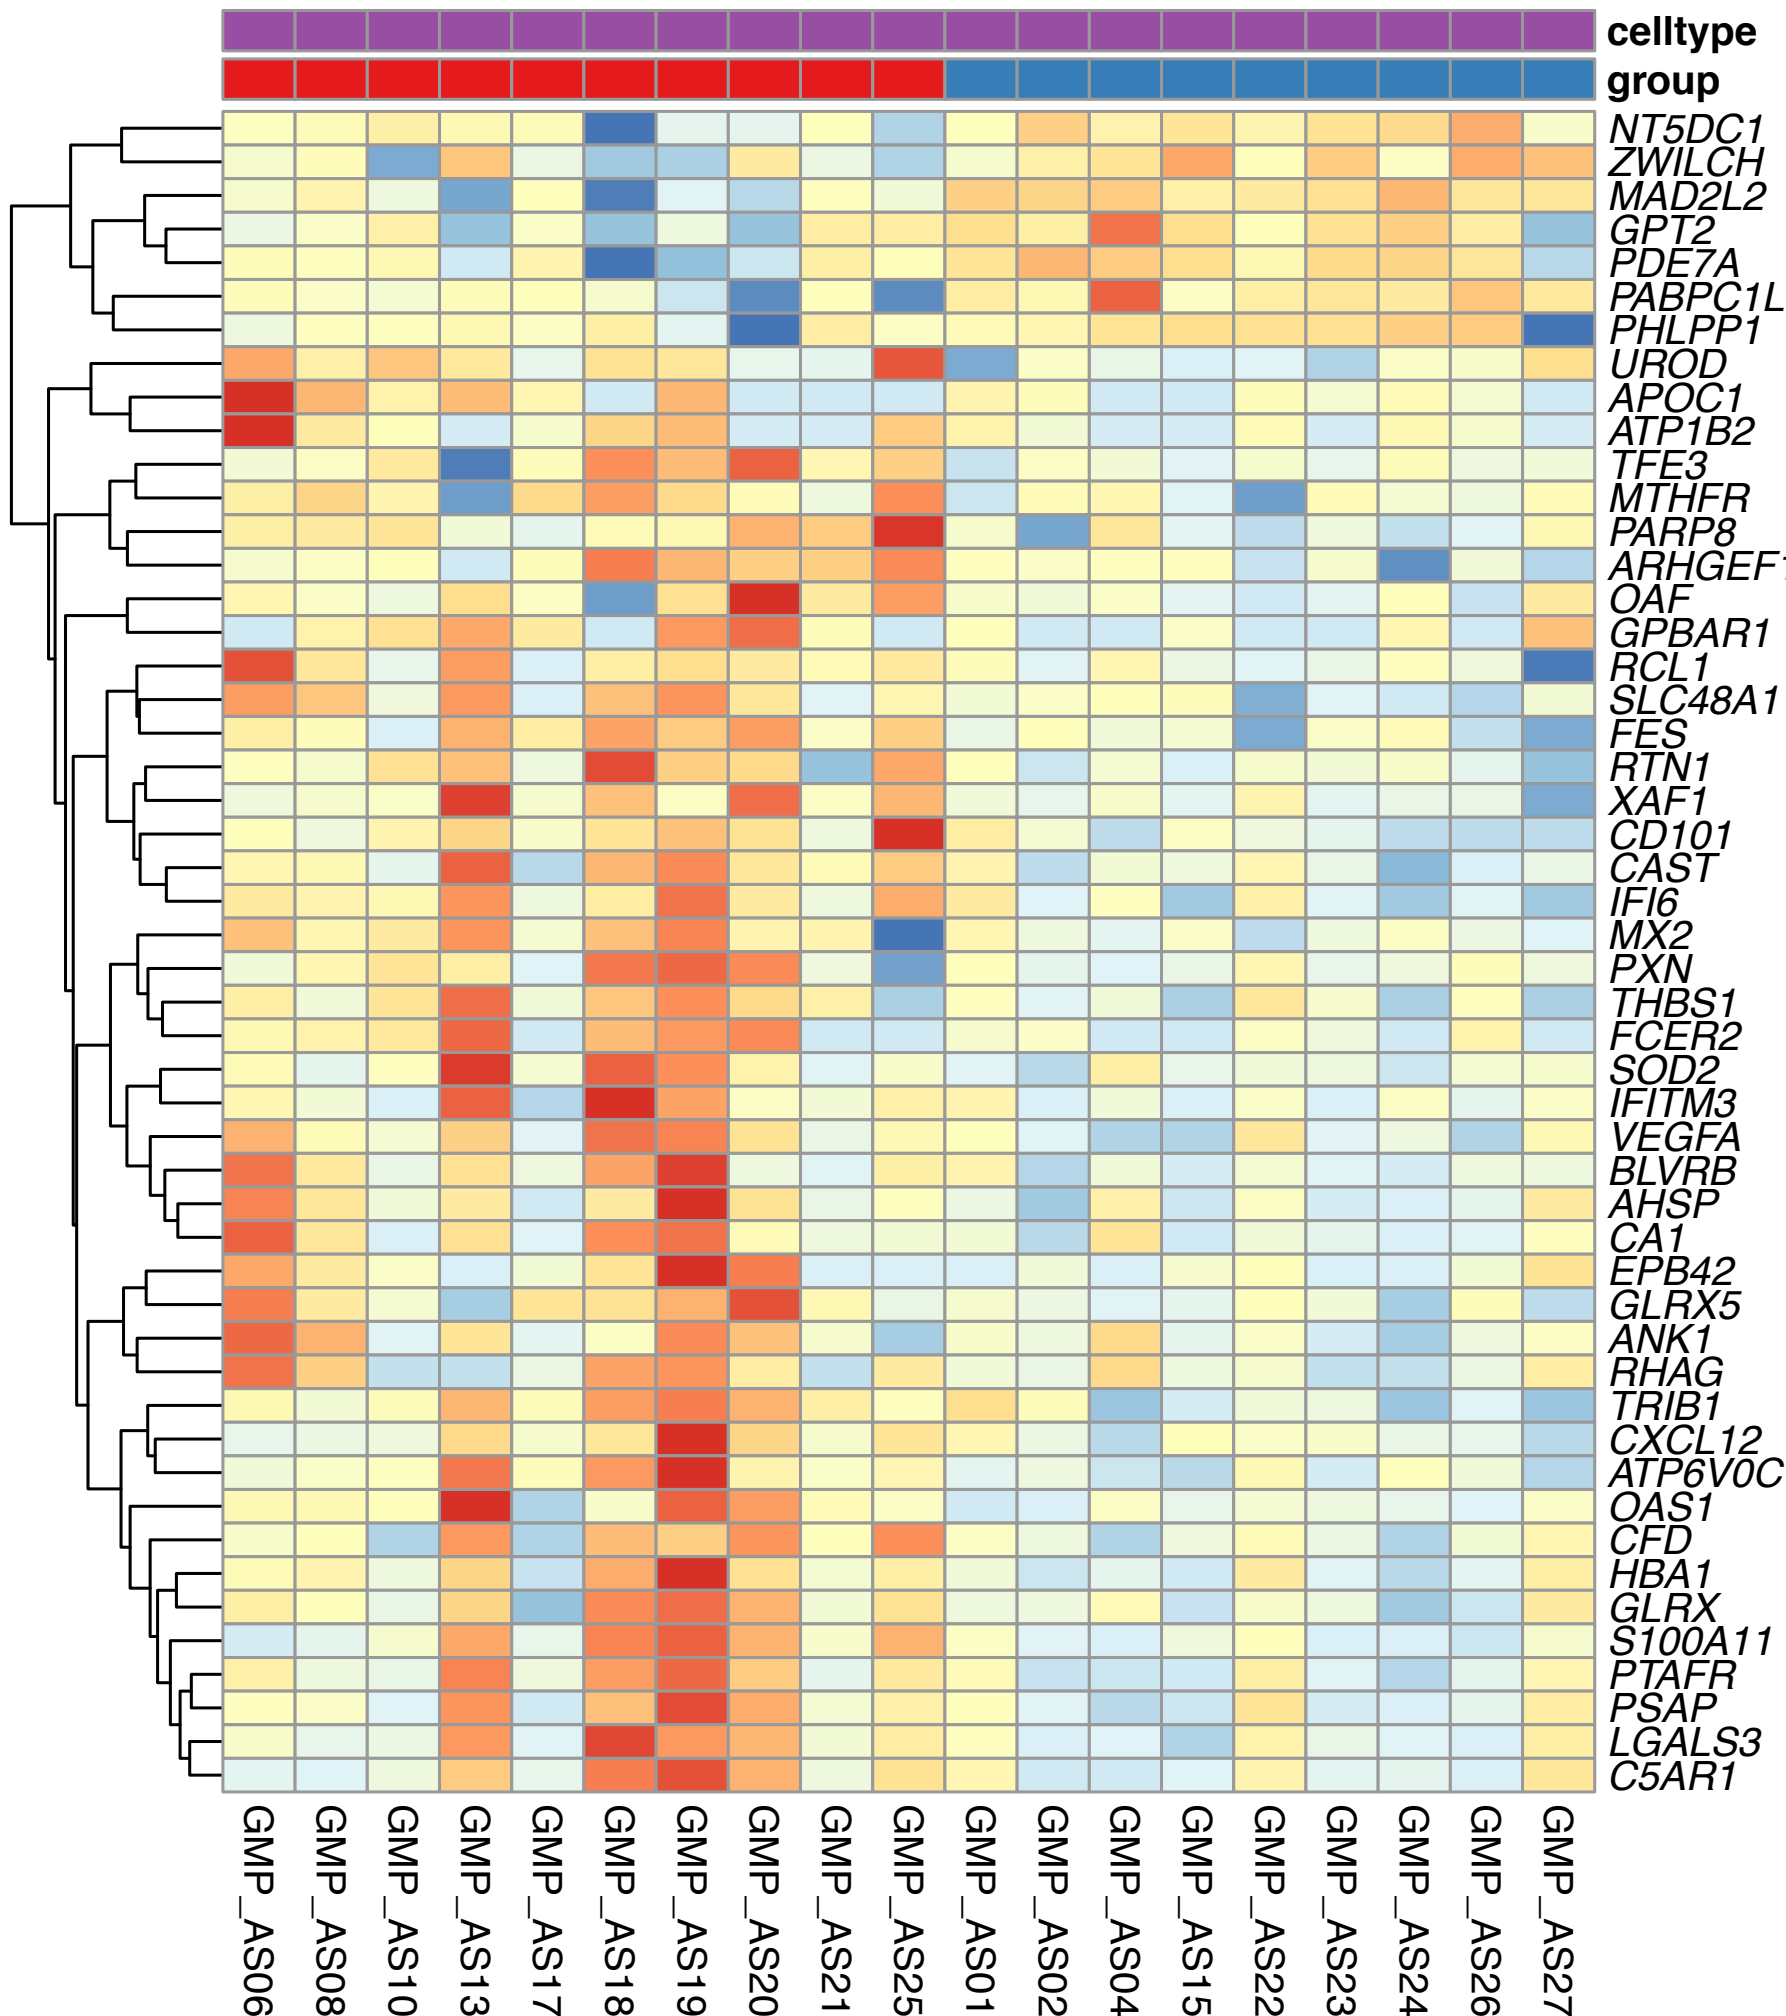

MPP

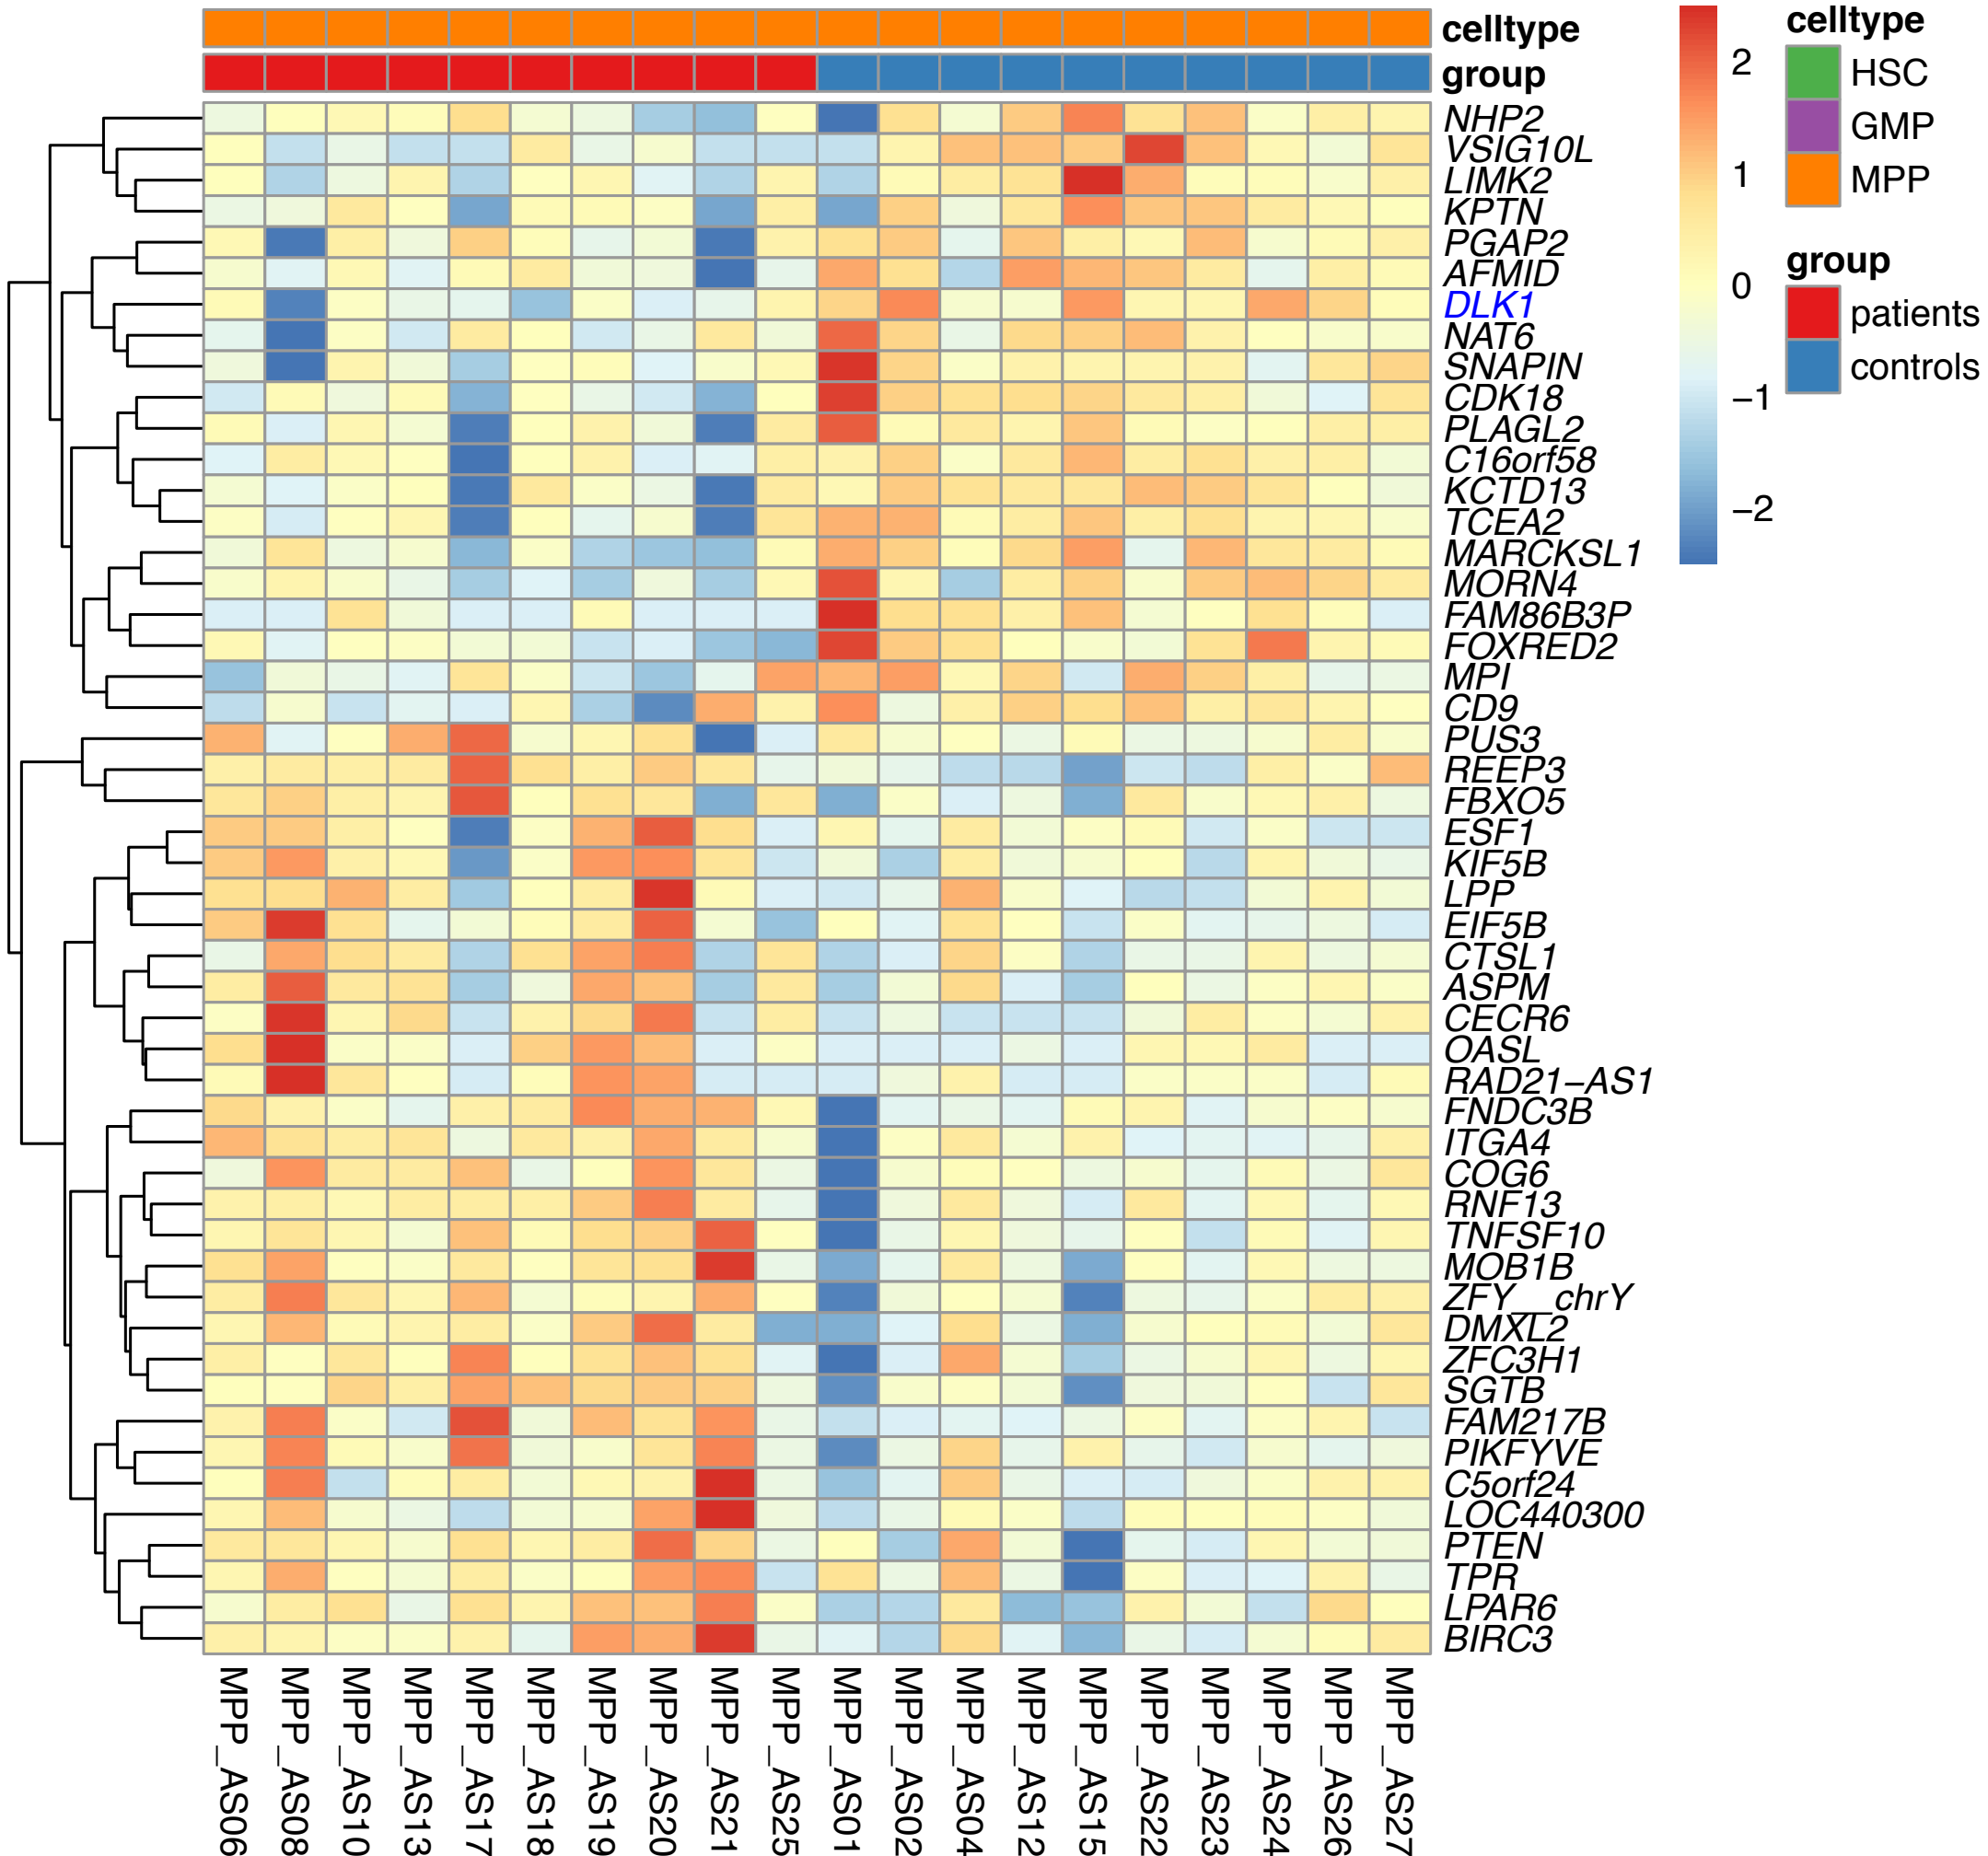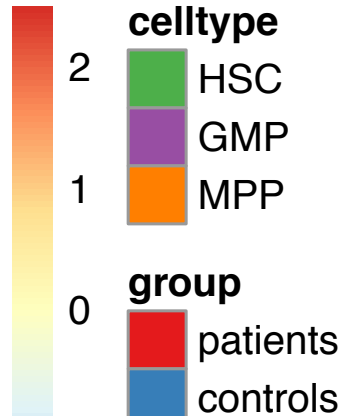

Supplement: supp [file elife-60939-supp-v1.zip]

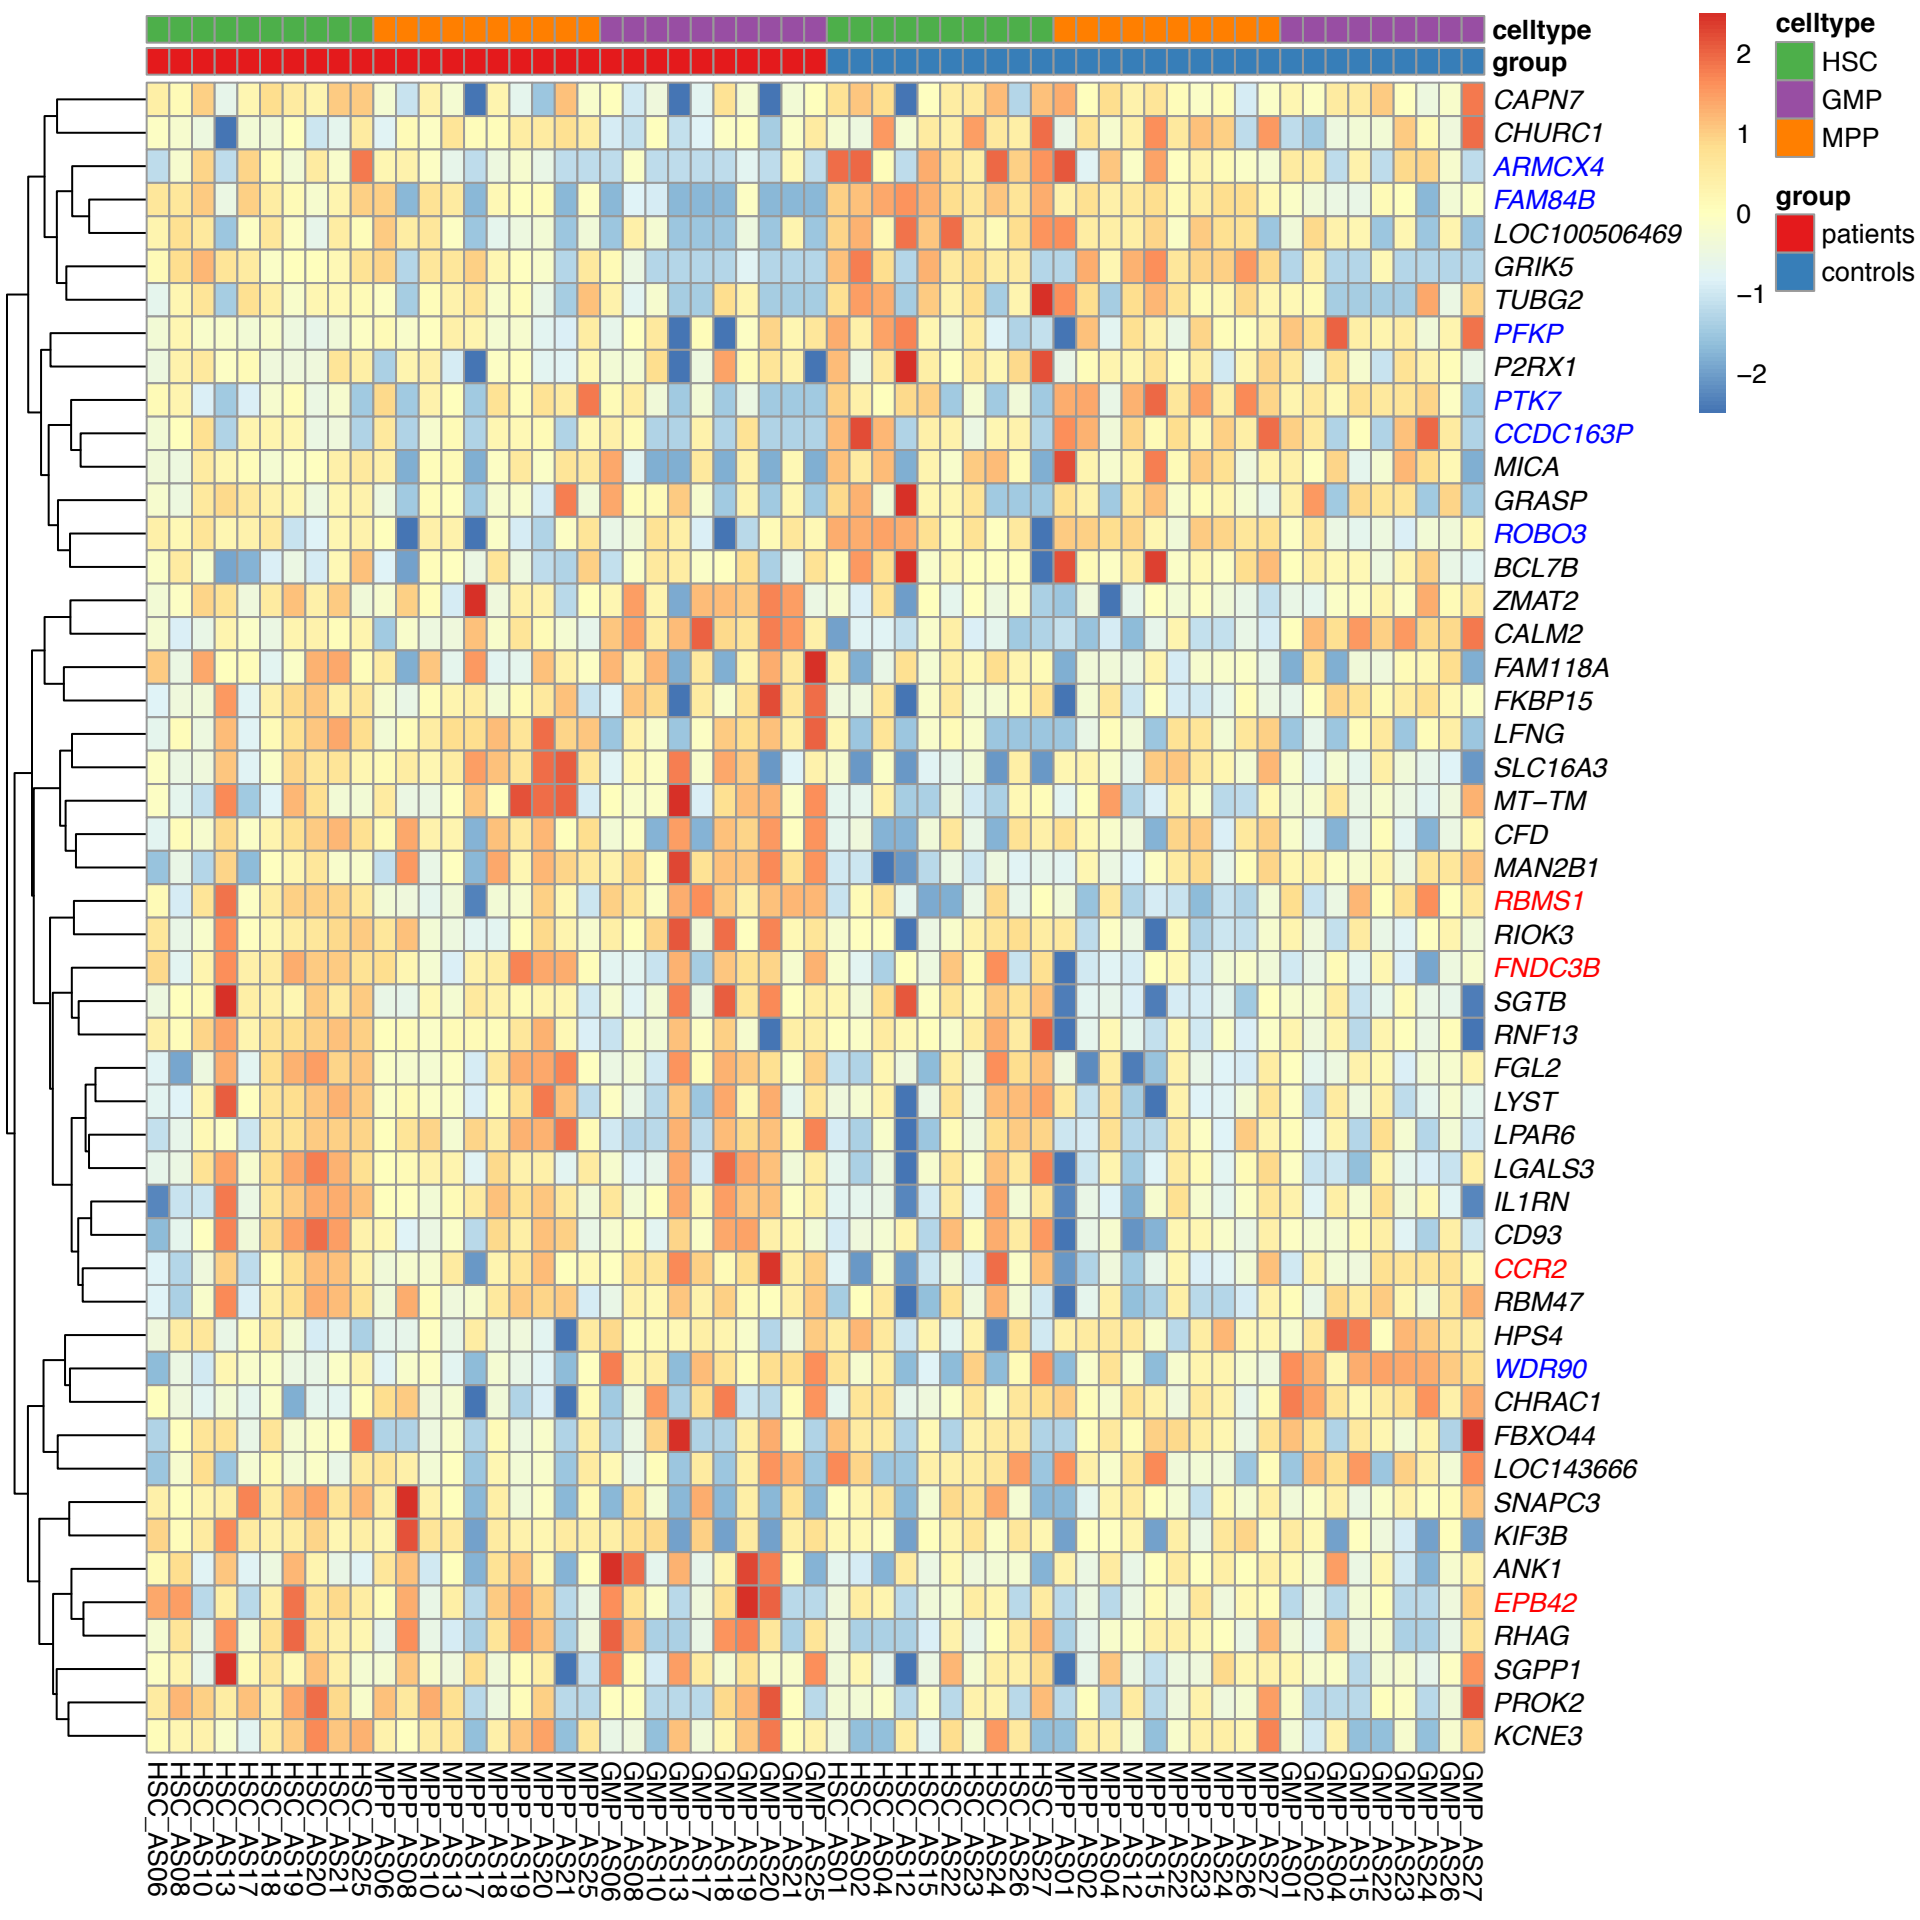

Supplement: supp [file elife-60939-supp-v1.zip]

A

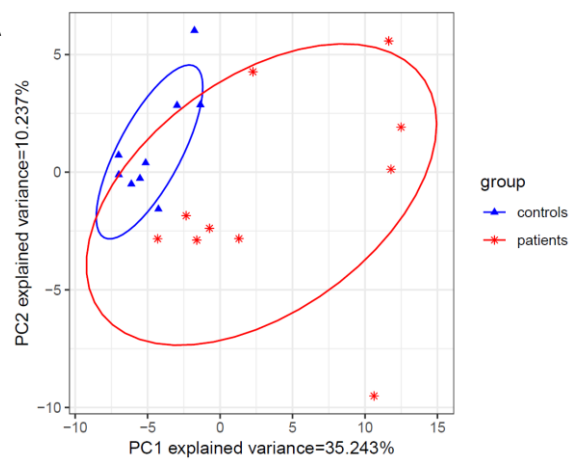

GMP

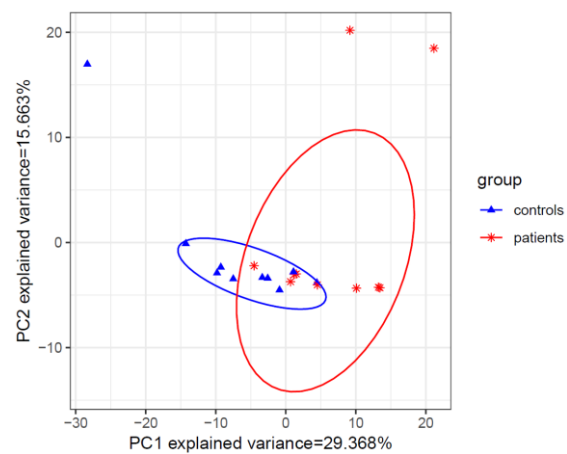

MPP

B

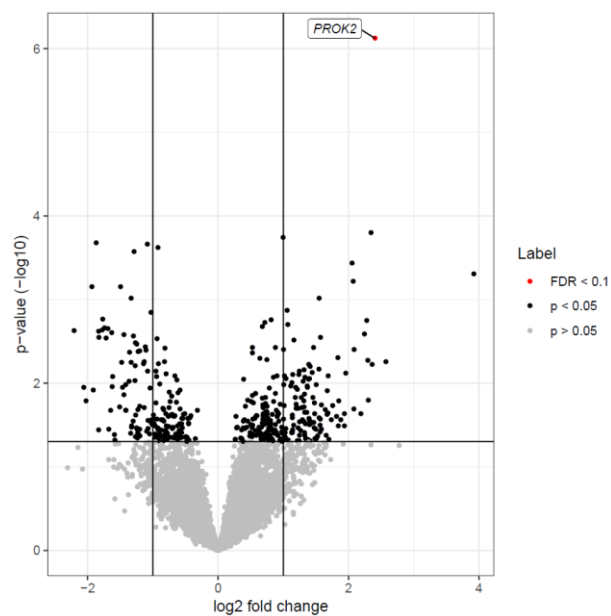

HSC

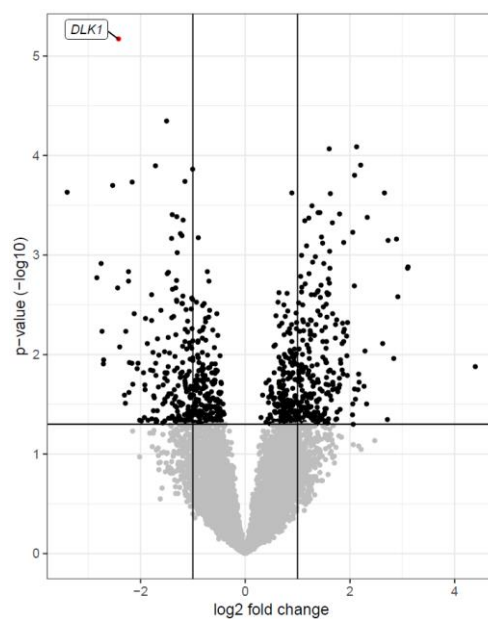

MPP

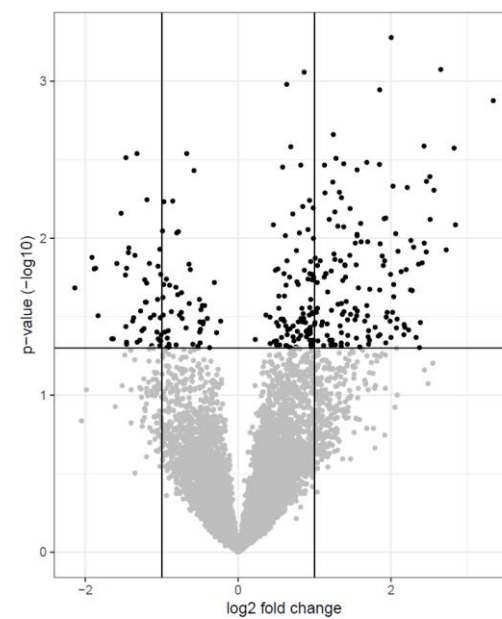

GMP

Supplement: supp [file elife-60939-supp-v1.zip]
